# Supplementary material for: 4,5-Bis(arylethynyl)-1,2,3-triazoles—A New Class of Fluorescent Labels: Synthesis and Applications
Source: MDPI journal article supplement (doi:10.3390/molecules27103191), 2022-05-17

# Supplementary Information

## 4,5-Bis(arylethynyl)-1,2,3-triazoles—A New Class of Fluorescent Labels: Synthesis and Applications

Anastasia I. Govdi <sup>1,\*</sup>, Polina V. Tokareva <sup>1</sup>, Andrey M. Rumyantsev <sup>2</sup>, Maxim S. Panov <sup>1</sup>, Johannes Stellmacher <sup>3</sup>, Ulrike Alexiev <sup>3</sup>, Natalia A. Danilkina <sup>1</sup> and Irina A. Balova <sup>1,\*</sup>

<sup>1</sup> Institute of Chemistry, Saint Petersburg State University (SPbU), Universitetskaya nab. 7/9, 199034 Saint Petersburg, Russia; tokareva.spbu@gmail.com (P.V.T.); m.s.panov@spbu.ru (M.S.P.); danilkina.natalia@gmail.com (N.A.D.)

<sup>2</sup> Department of Genetics and Biotechnology, Saint Petersburg State University (SPbU), Universitetskaya nab. 7/9, 199034 Saint Petersburg, Russia; rumyantsev-am@mail.ru

<sup>3</sup> Department of Physics, Institute of Experimental Physics, Freie Universität Berlin, Arnimallee 14, 14195 Berlin, Germany; jcart@zedat.fu-berlin.de (J.S.); ulrike.alexiev@fu-berlin.de (U.A.)

\* Correspondence: a.govdi@spbu.ru (A.I.G.); i.balova@spbu.ru (I.A.B.); Tel.: +7-812-428-4054 (A.I.G.); +7-812-428-6733 (I.A.B.)

<sup>1</sup>H NMR (CDCl<sub>3</sub>, 400.13 MHz)

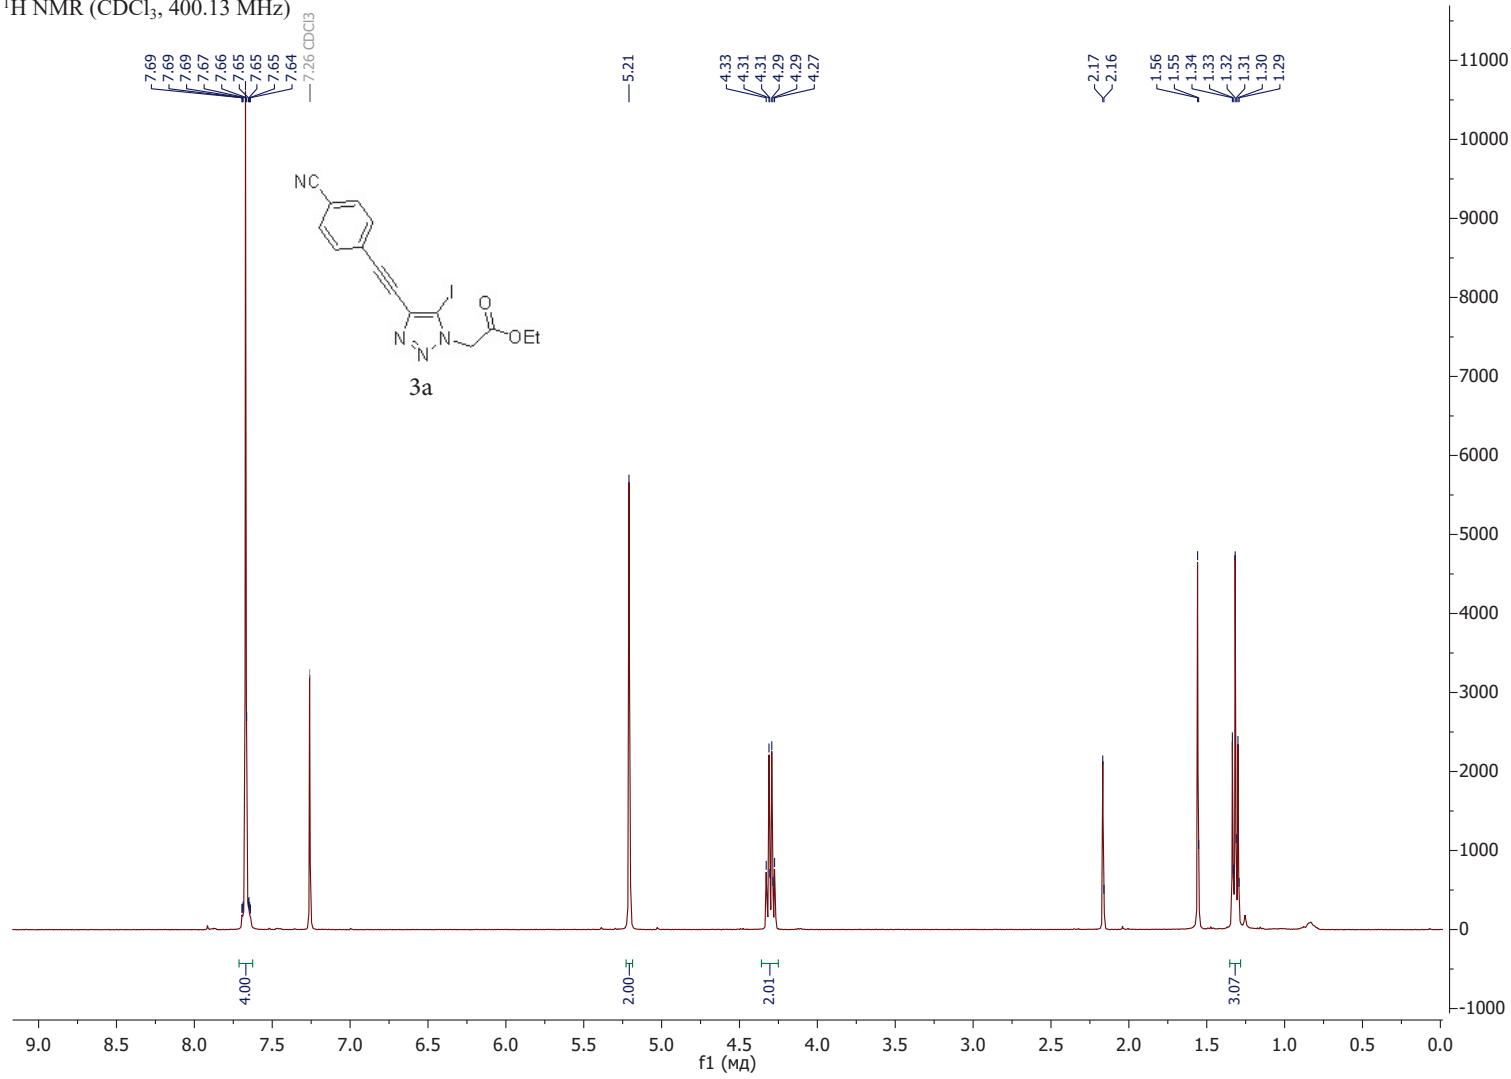

<sup>13</sup>C NMR (CDCl<sub>3</sub>, 101 MHz)

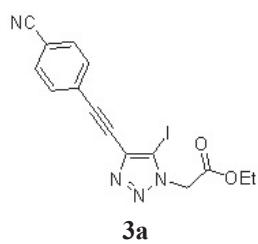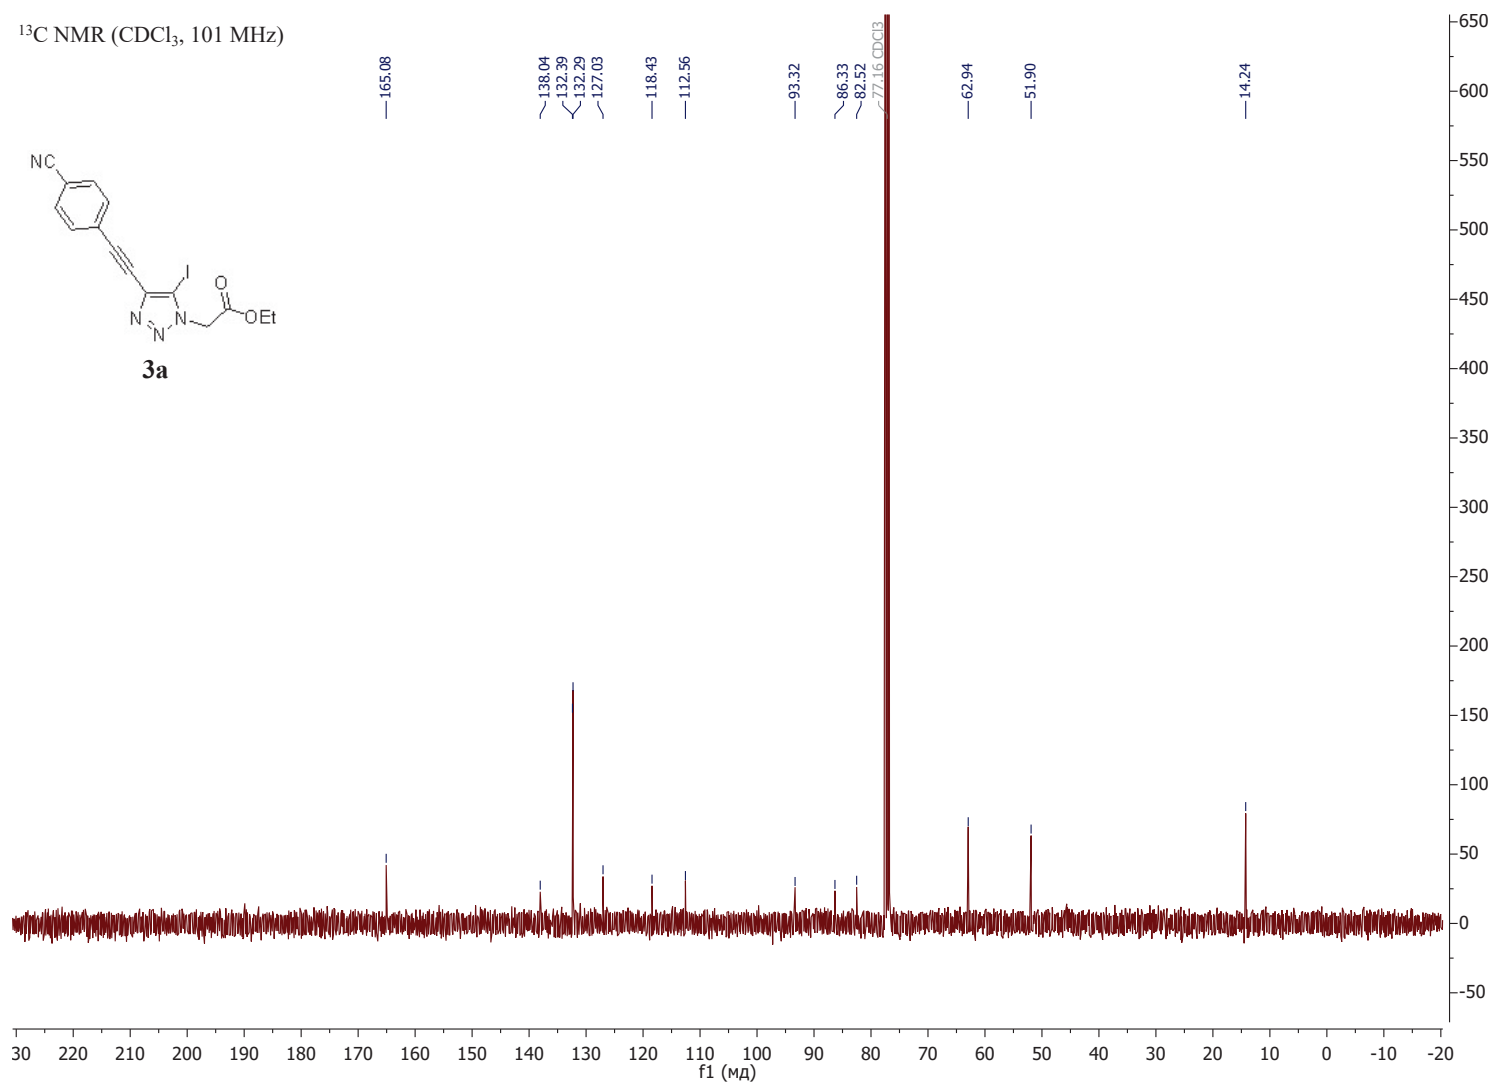

<sup>13</sup>C NMR (CDCl<sub>3</sub>, 101 MHz)

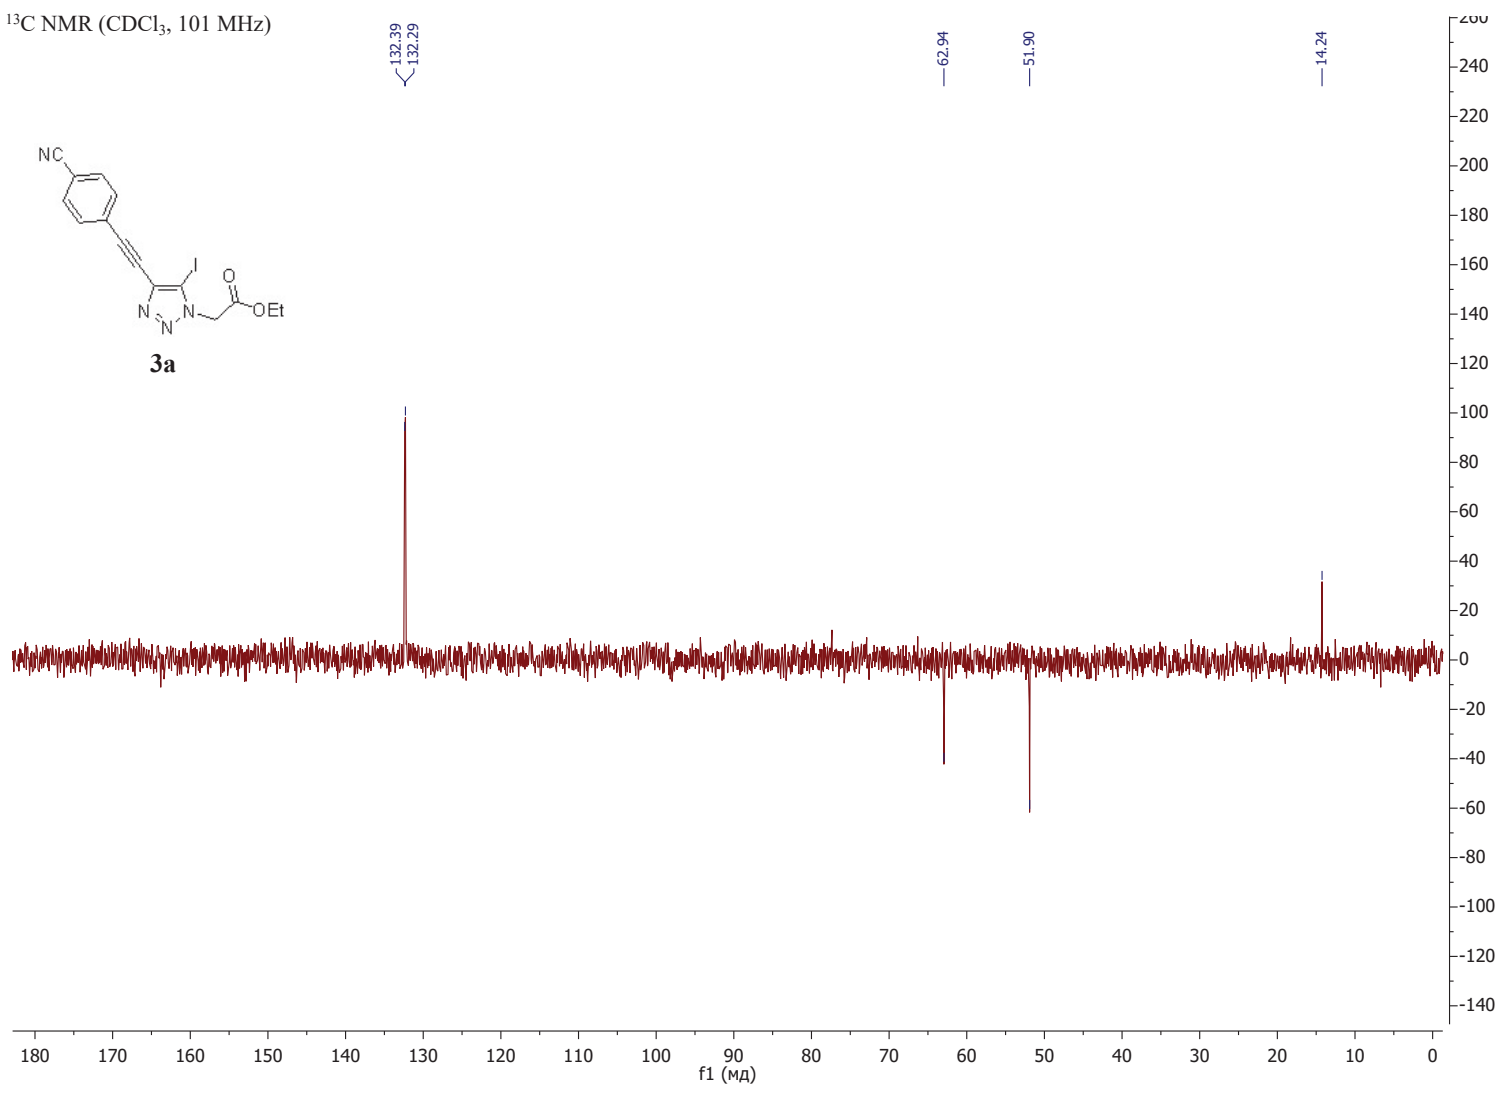

<sup>1</sup>H NMR (CDCl<sub>3</sub>, 400 MHz)

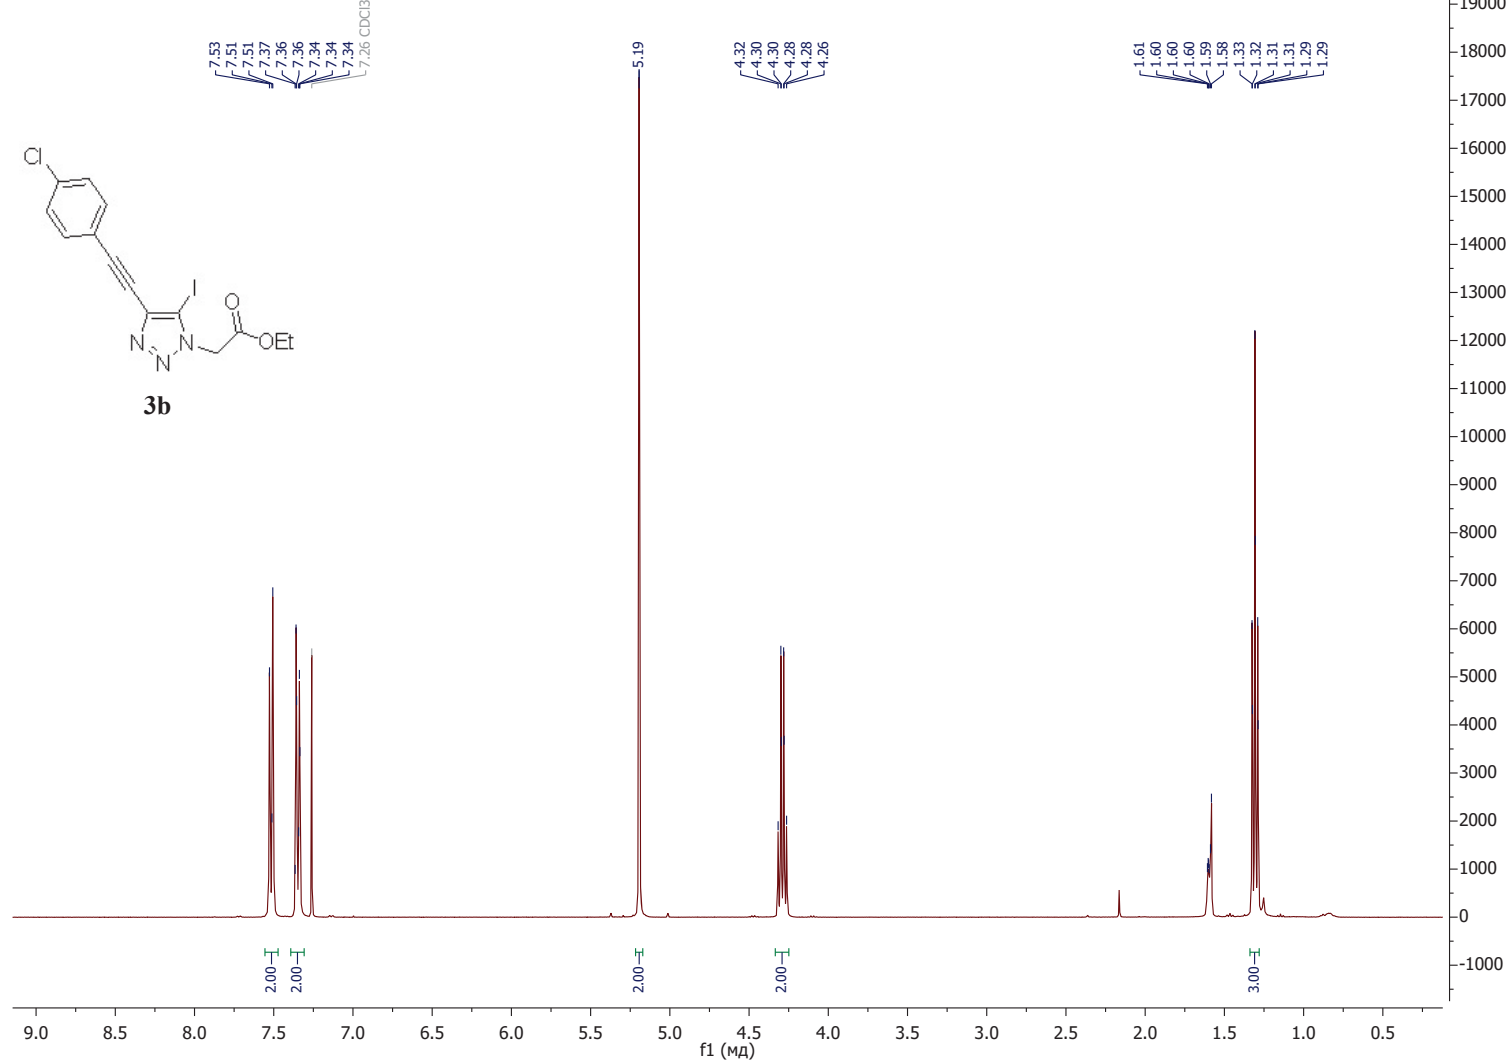

<sup>13</sup>C NMR (CDCl<sub>3</sub>, 101 MHz)

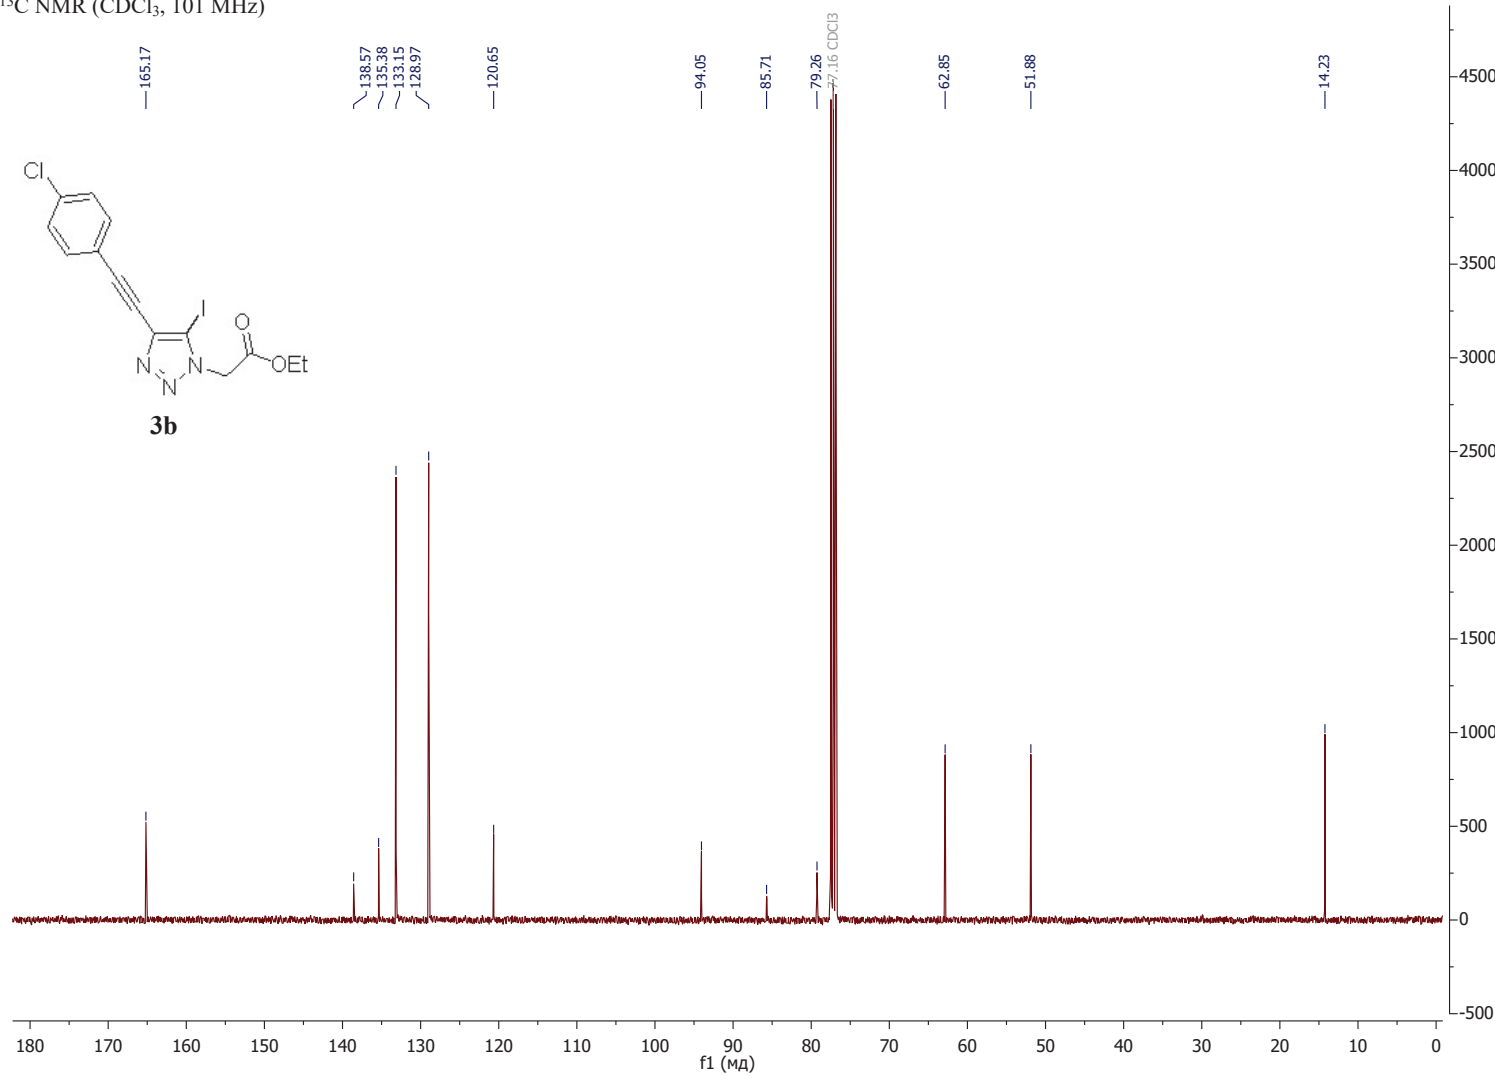

<sup>13</sup>C NMR (CDCl<sub>3</sub>, 101 MHz)

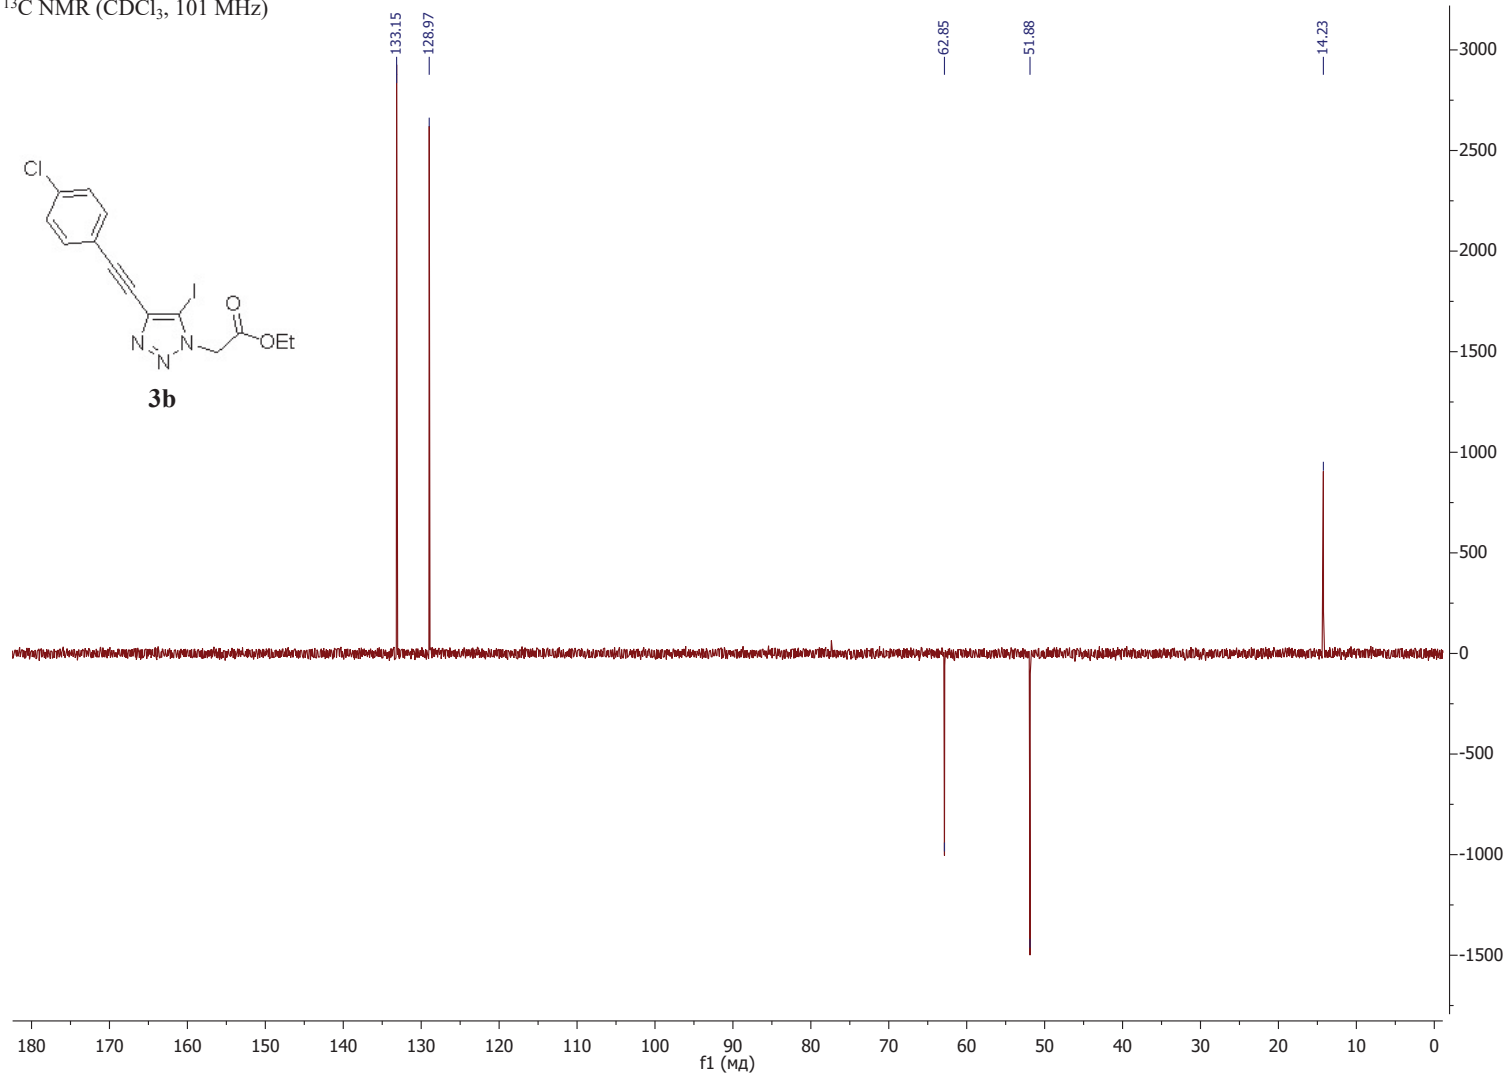

<sup>1</sup>H NMR (CDCl<sub>3</sub>, 400 MHz)

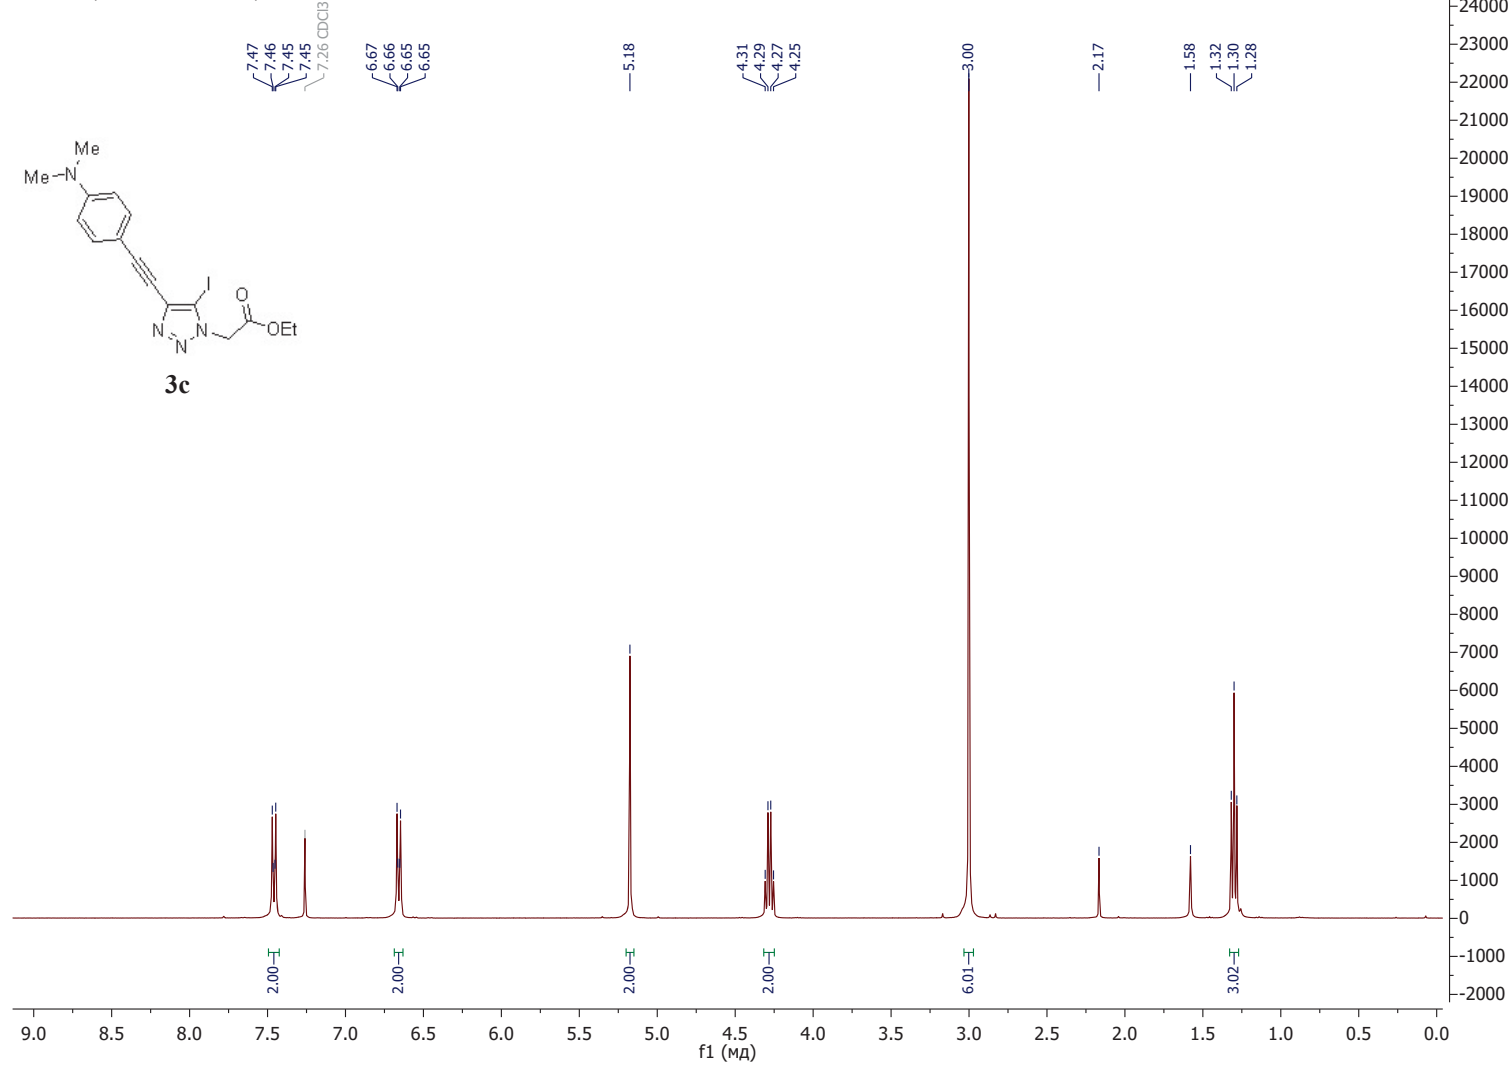



<sup>13</sup>C NMR (CDCl<sub>3</sub>, 101 MHz)

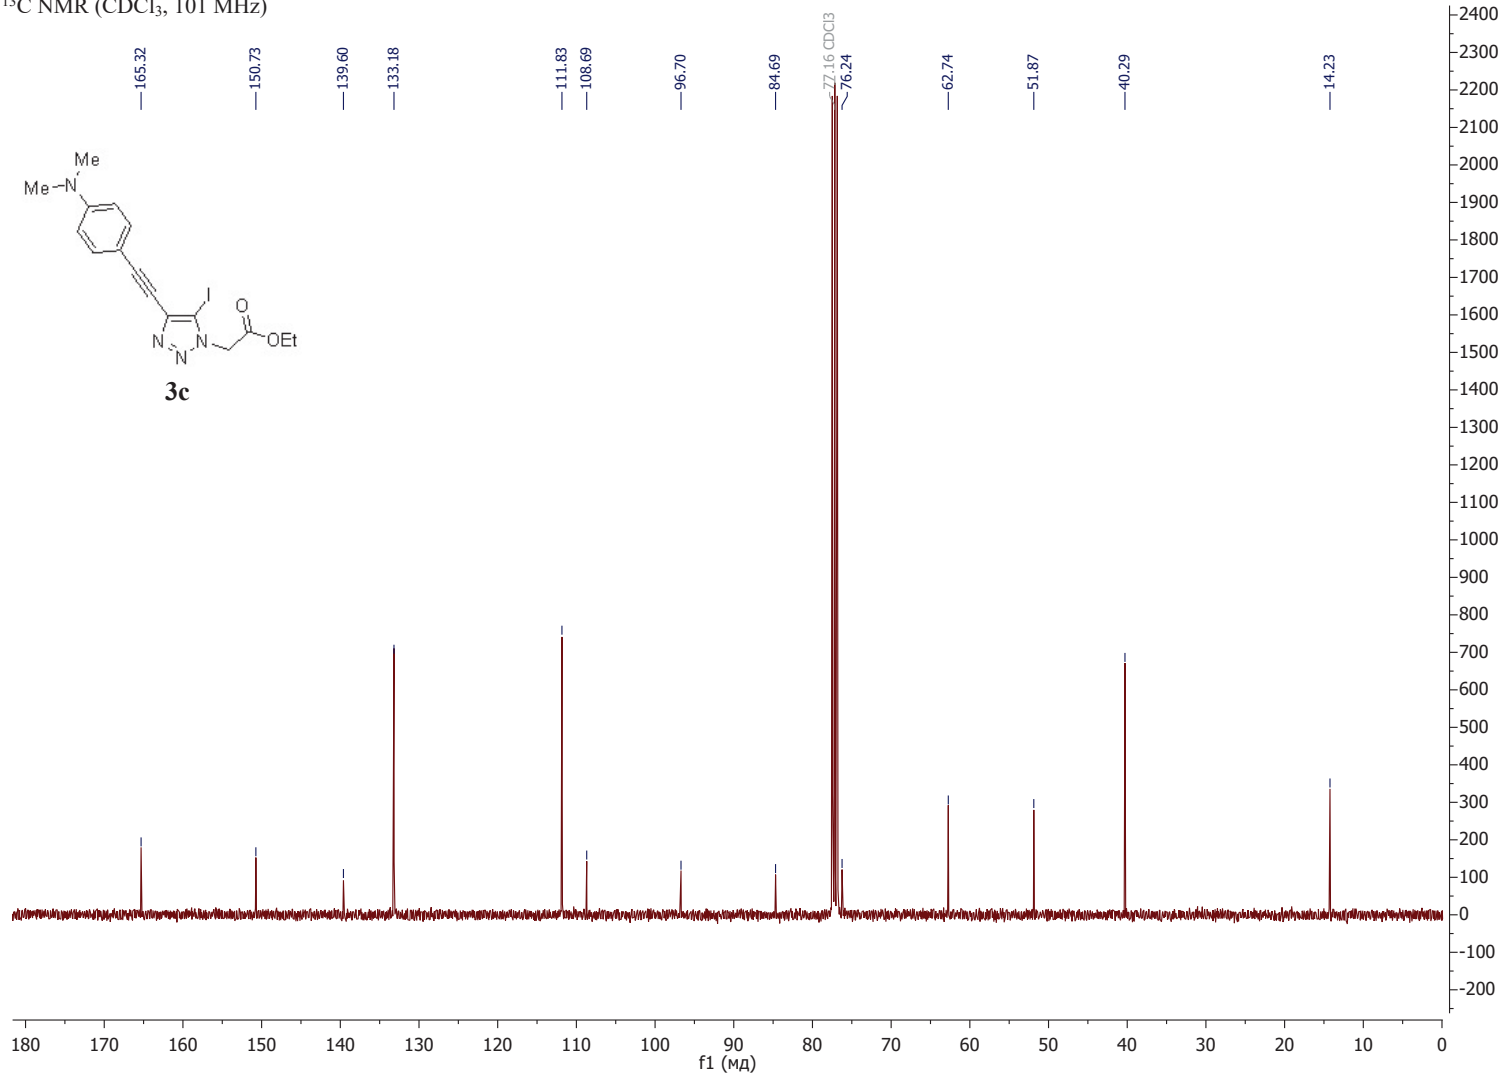

<sup>13</sup>C NMR (CDCl<sub>3</sub>, 101 MHz)

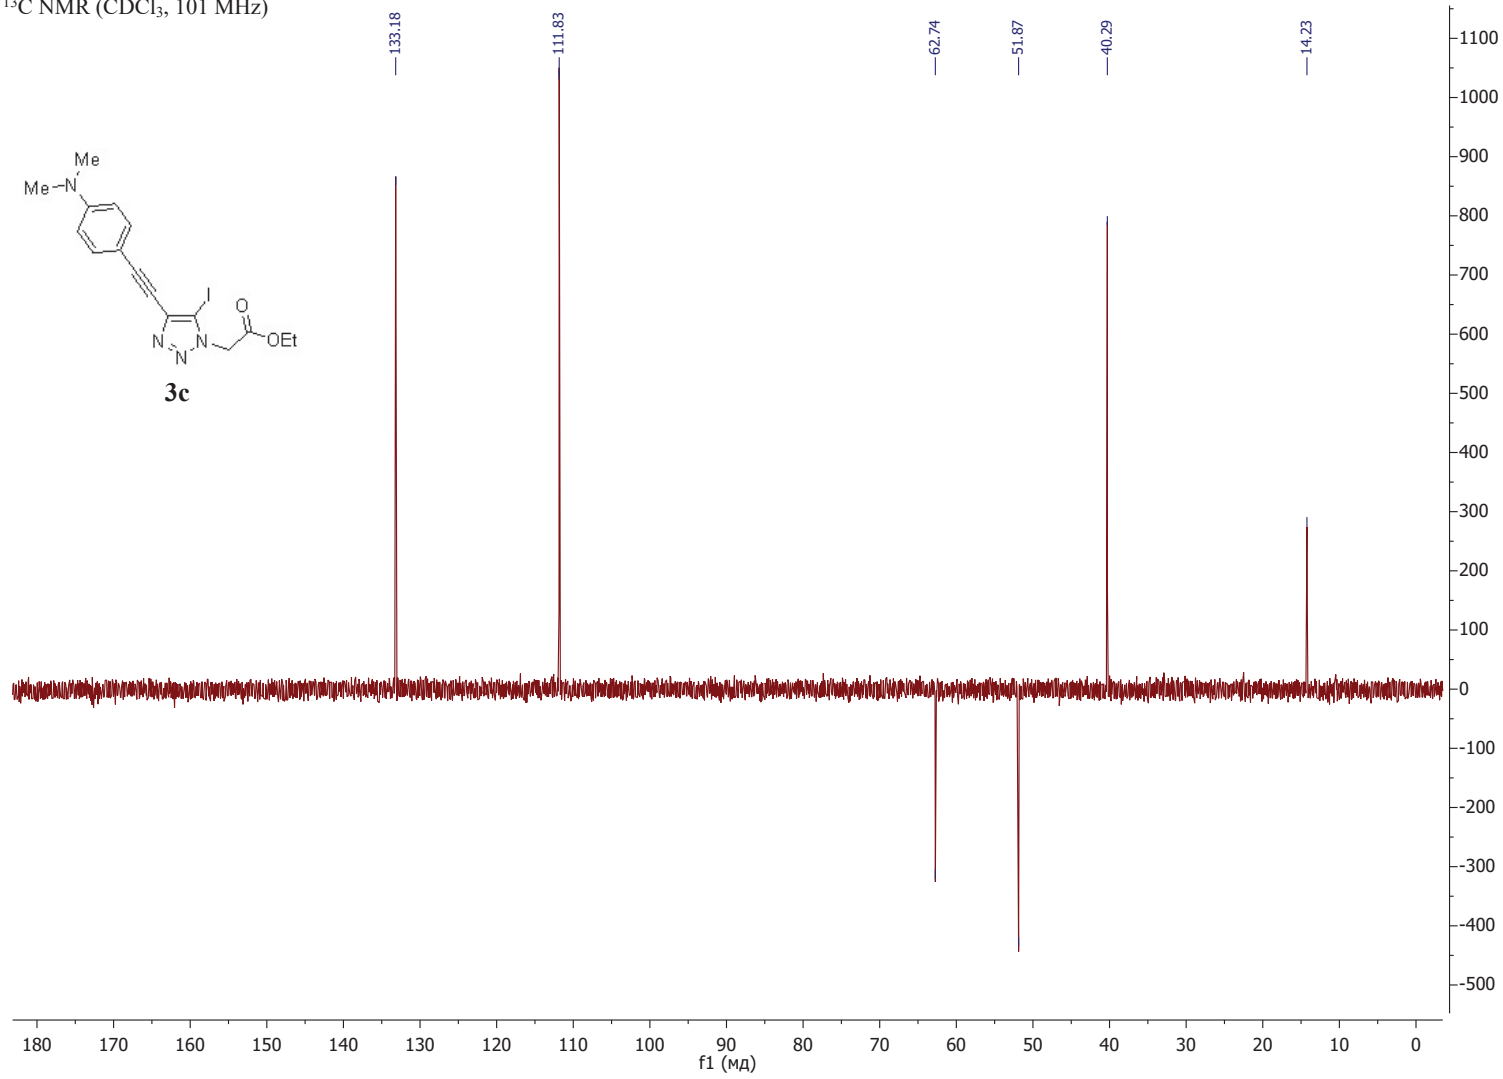

<sup>1</sup>H NMR (CDCl<sub>3</sub>, 400 MHz)

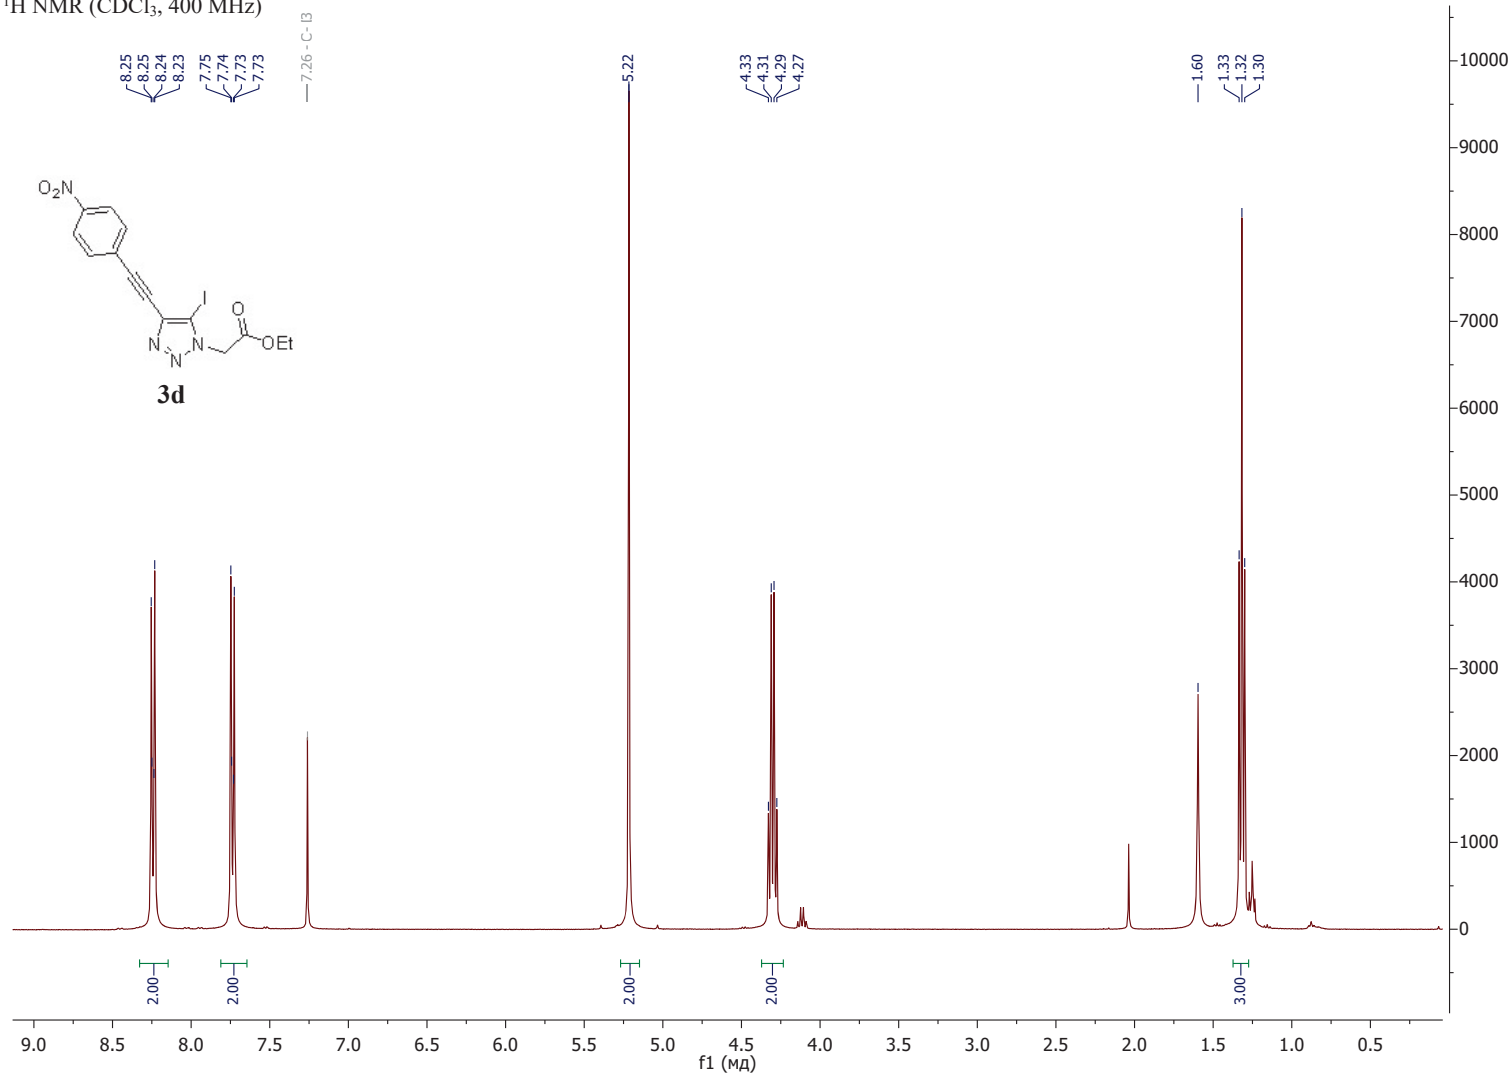

<sup>13</sup>C NMR (CDCl<sub>3</sub>, 101 MHz)

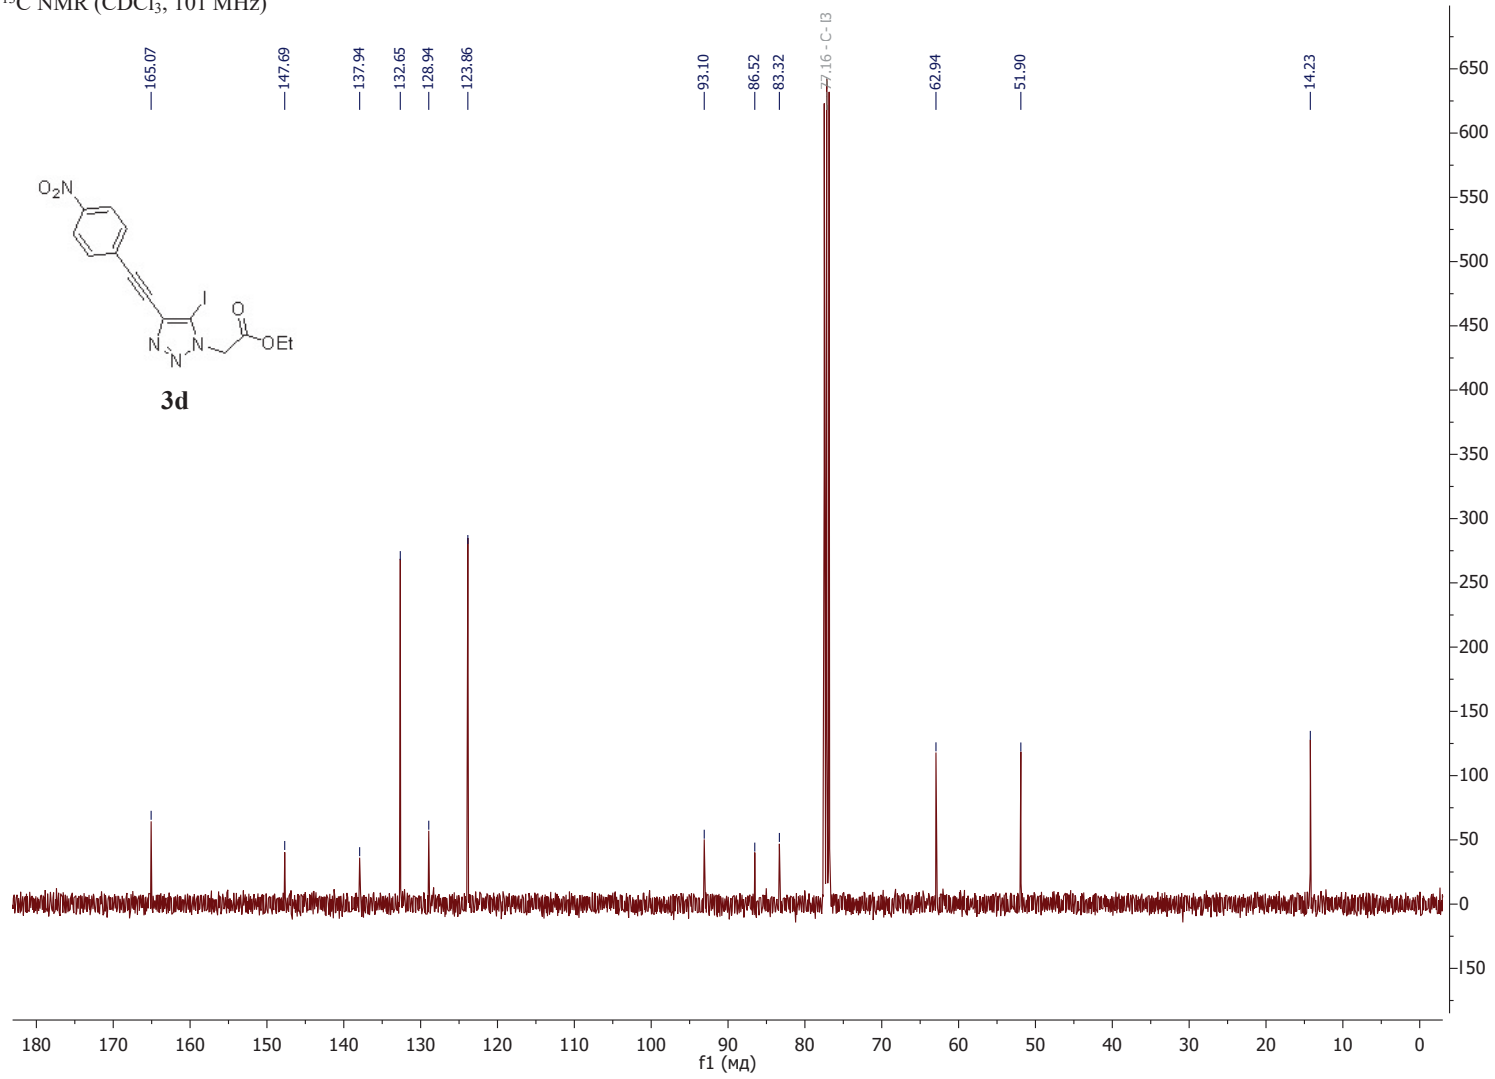

<sup>1</sup>H NMR (CDCl<sub>3</sub>, 400 MHz)

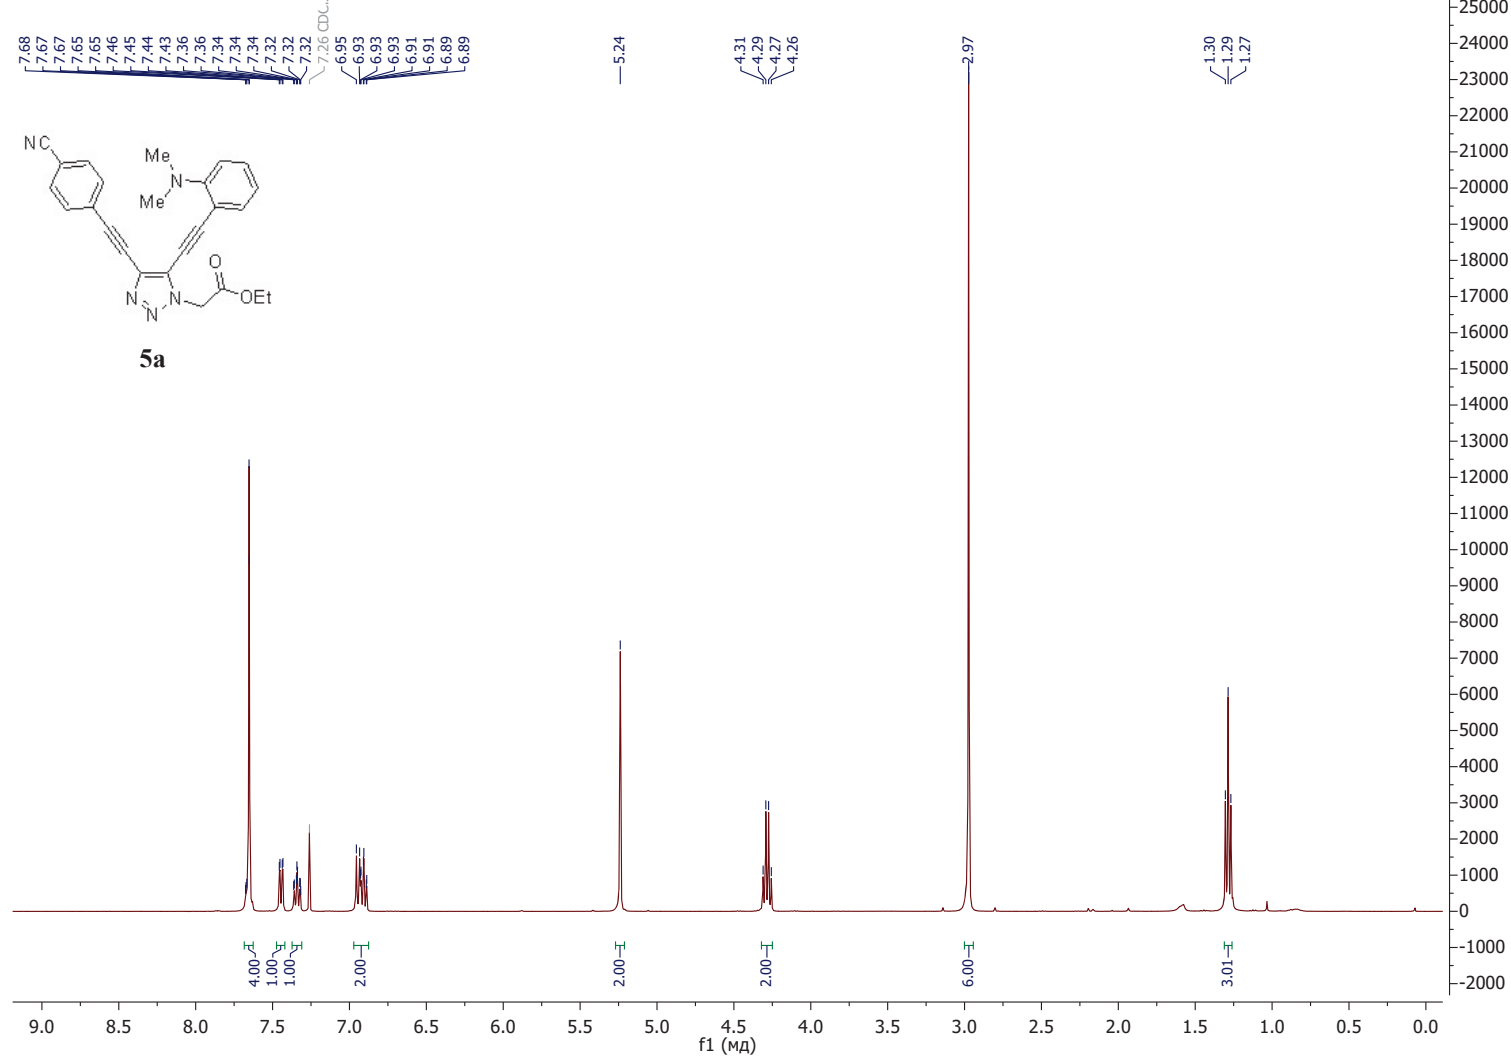

<sup>13</sup>C NMR (CDCl<sub>3</sub>, 101 MHz)

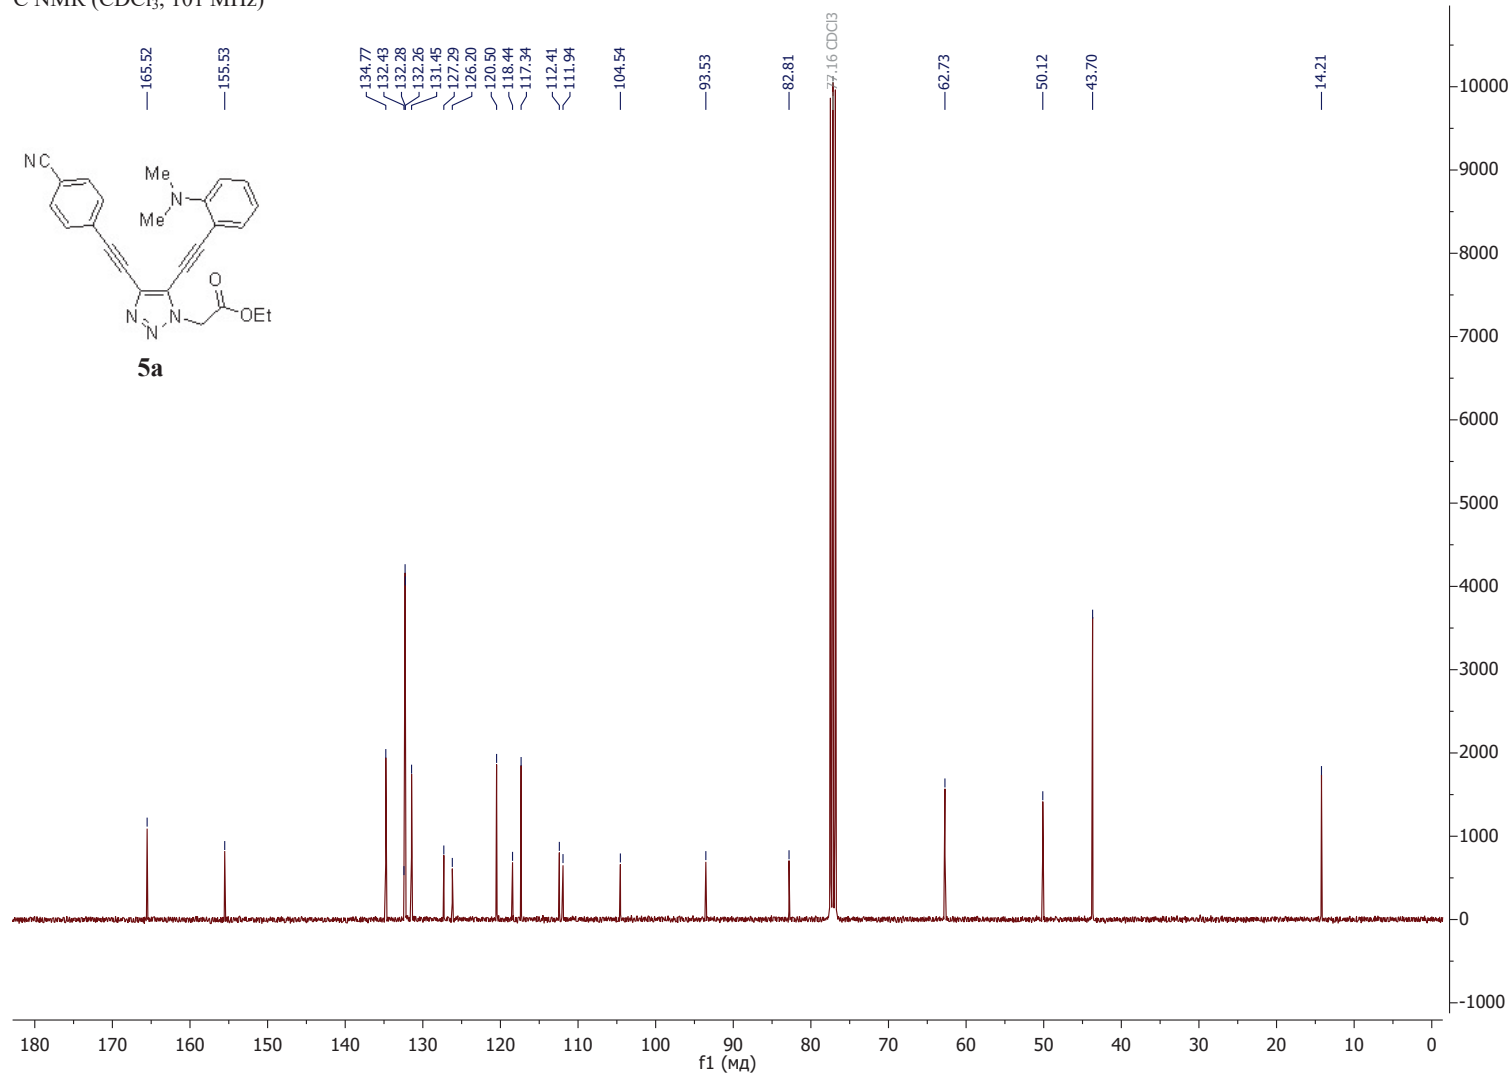

<sup>13</sup>C NMR (CDCl<sub>3</sub>, 101 MHz)

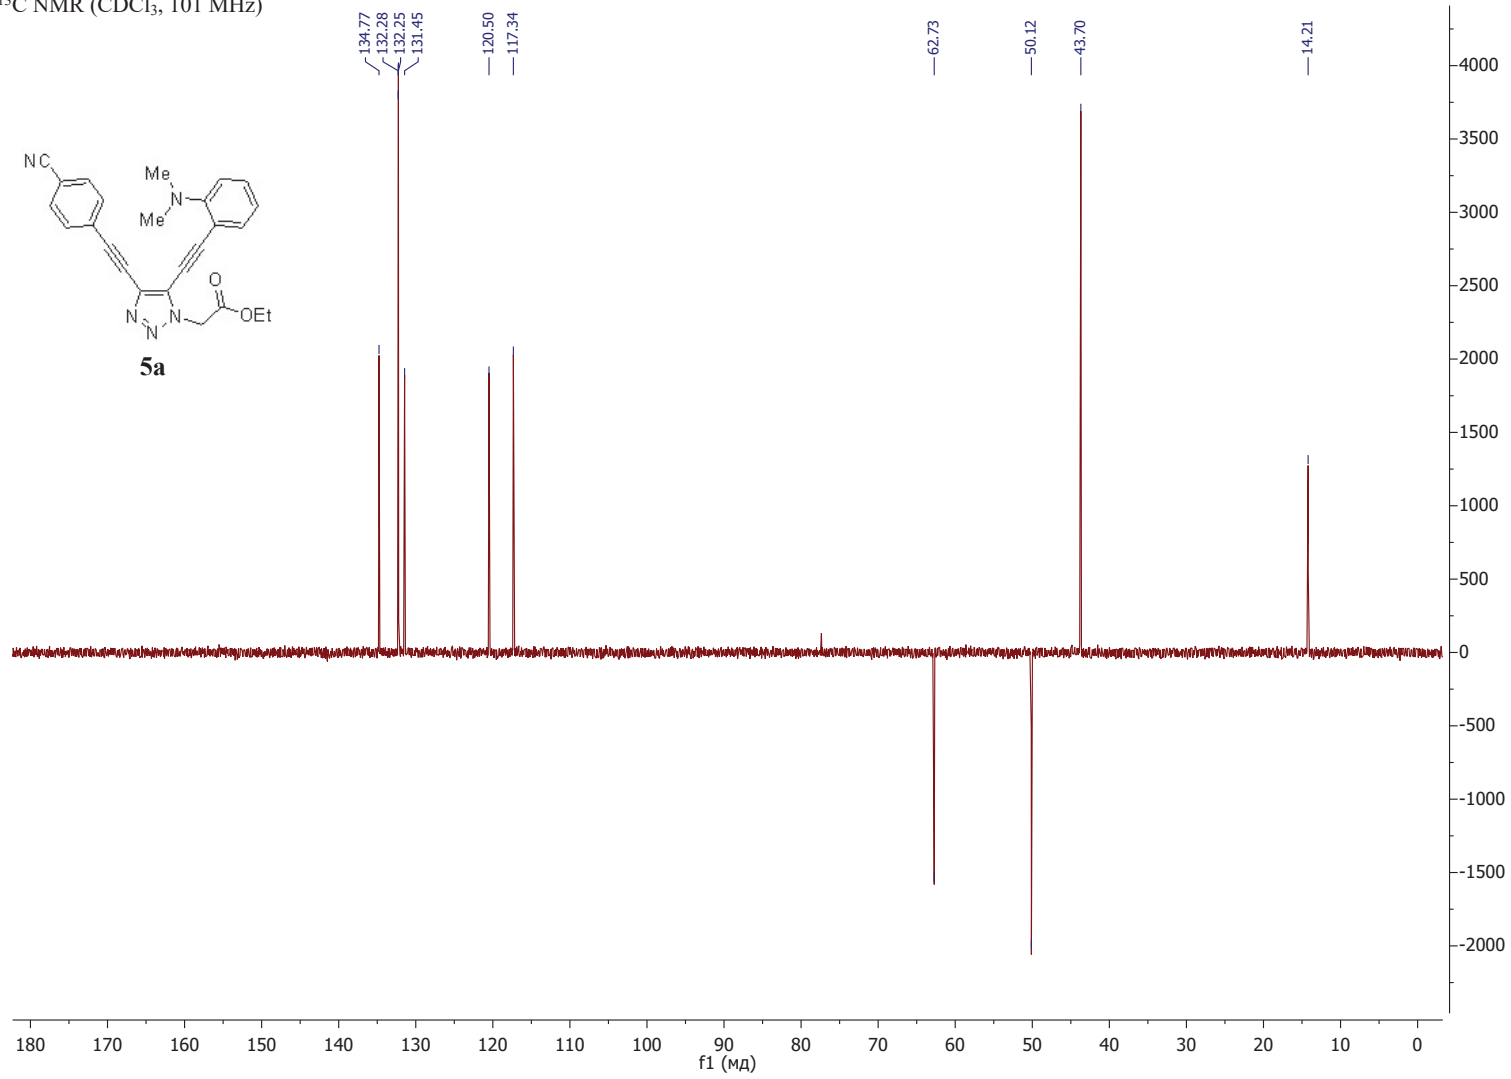

<sup>1</sup>H NMR (CDCl<sub>3</sub>, 400 MHz)

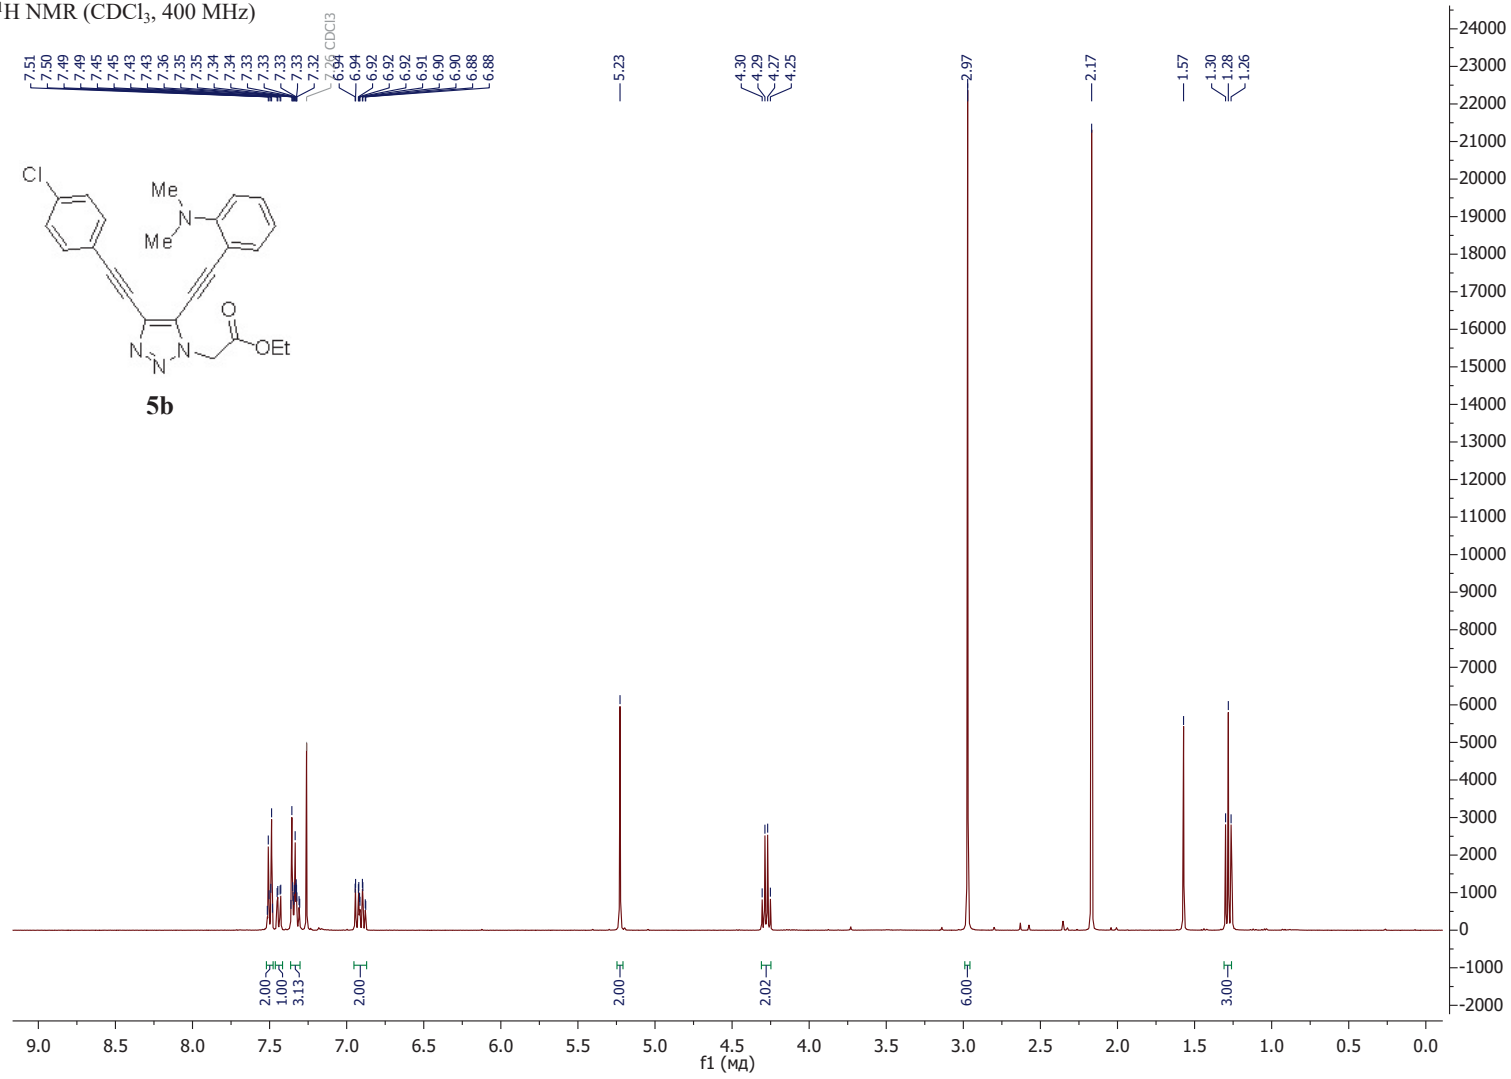



<sup>13</sup>C NMR (CDCl<sub>3</sub>, 101 MHz)

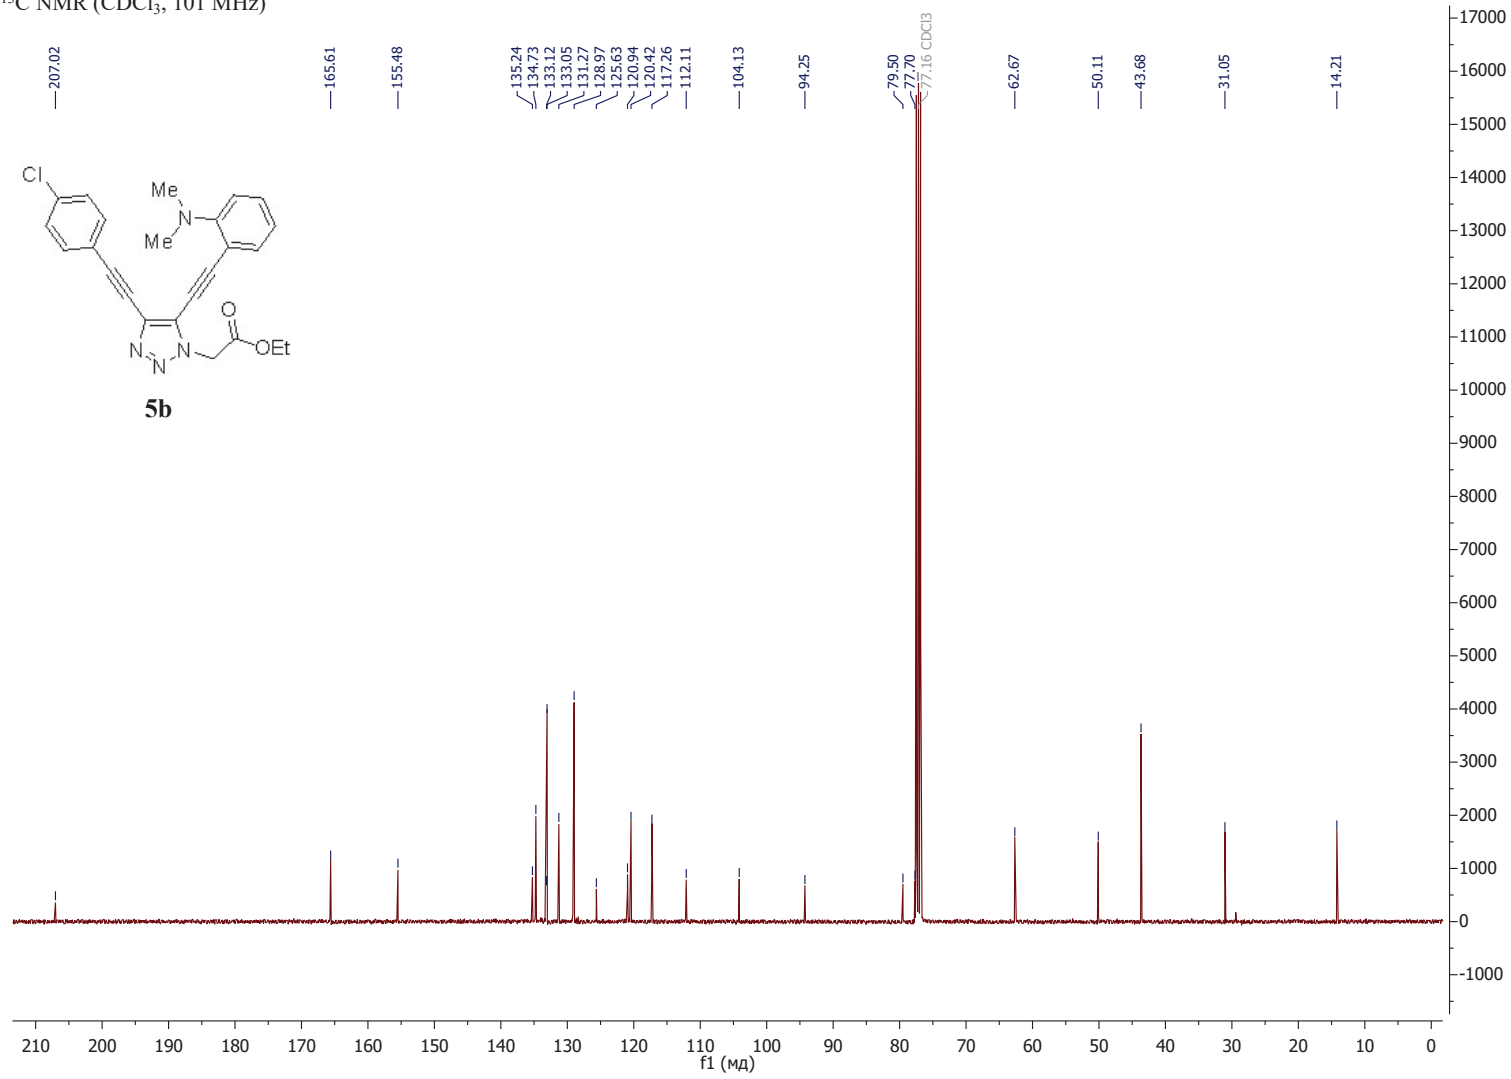

<sup>13</sup>C NMR (CDCl<sub>3</sub>, 101 MHz)

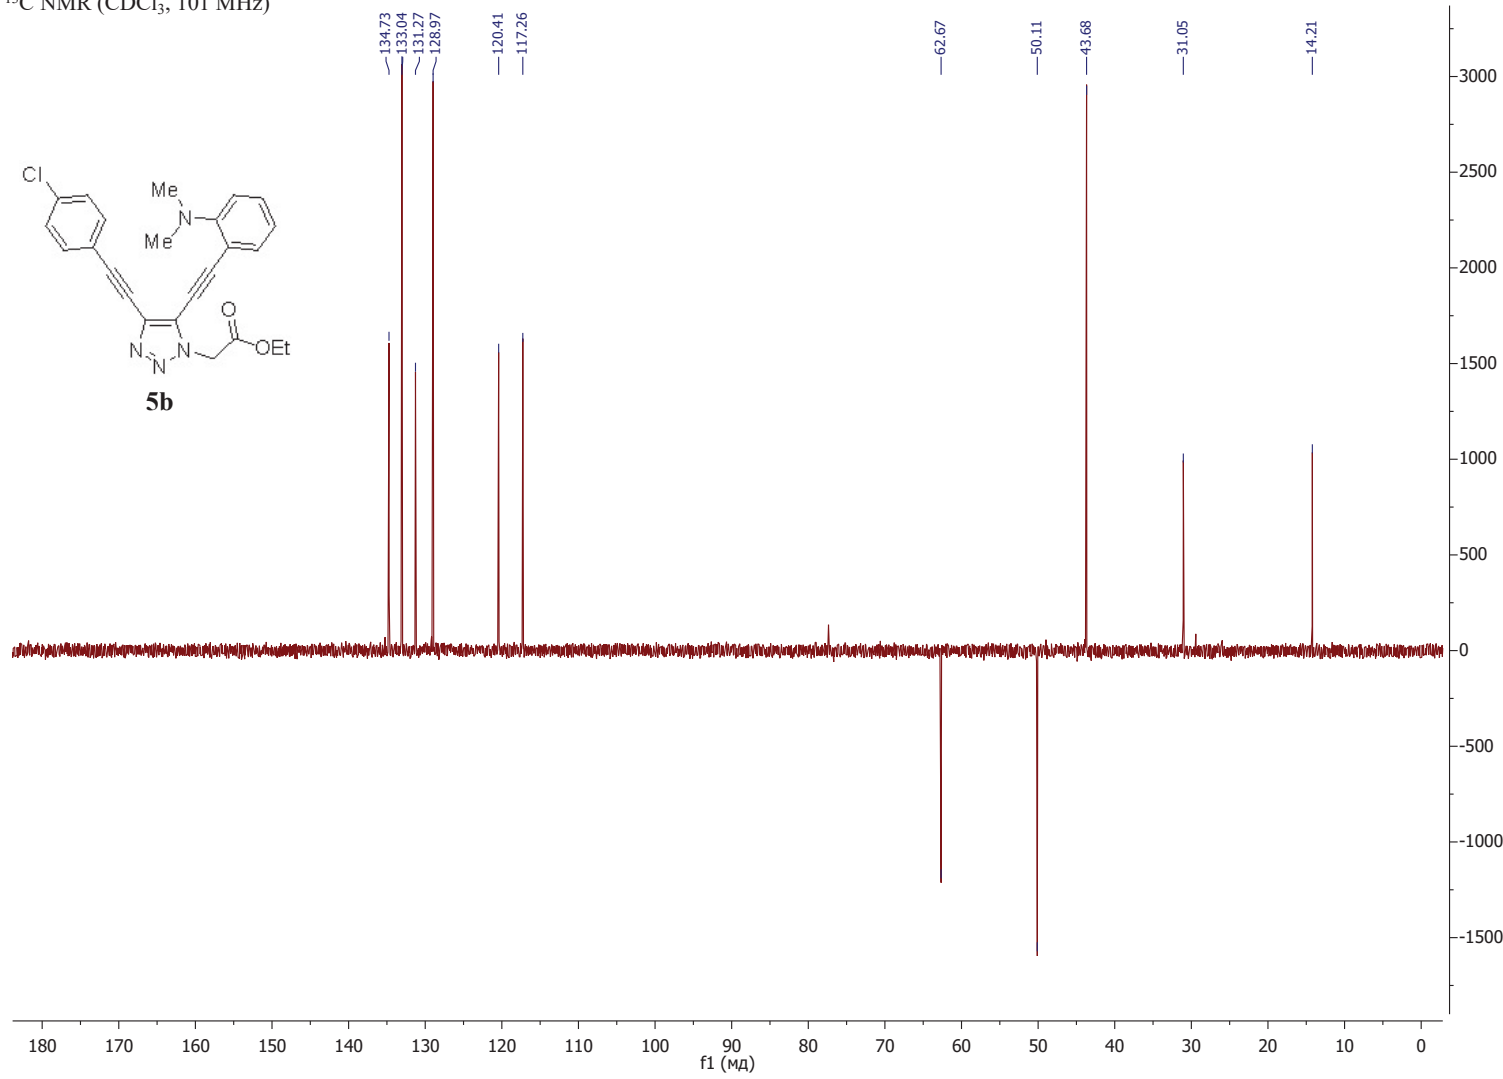

<sup>1</sup>H NMR (CDCl<sub>3</sub>, 400 MHz)

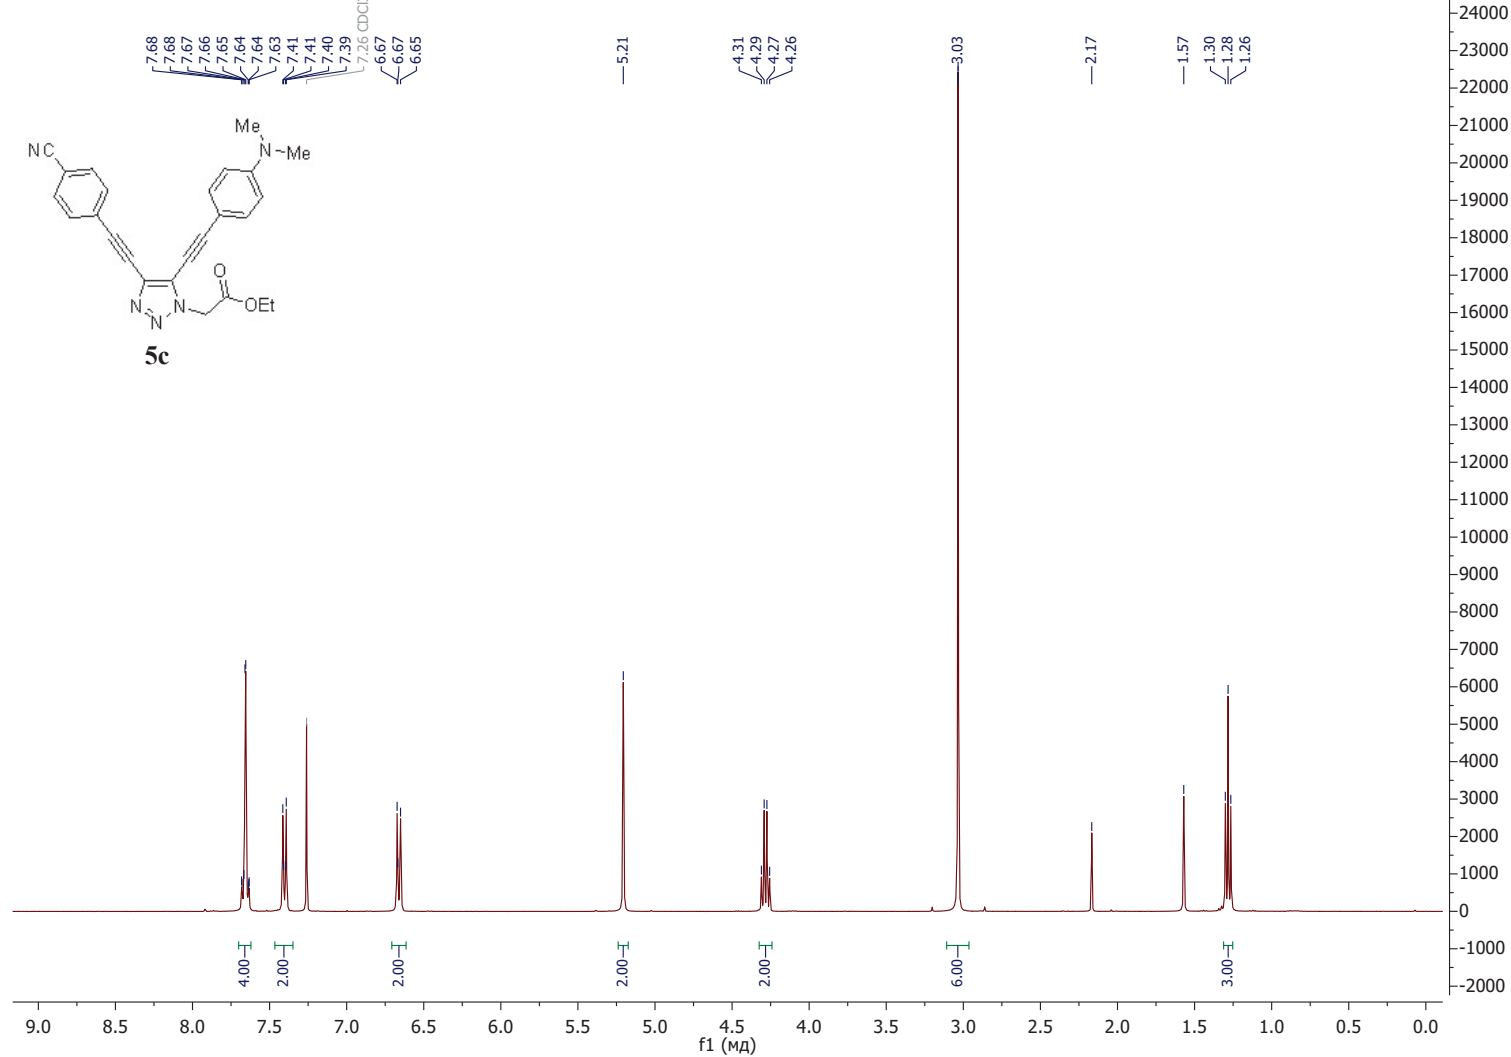

<sup>13</sup>C NMR (CDCl<sub>3</sub>, 101 MHz)

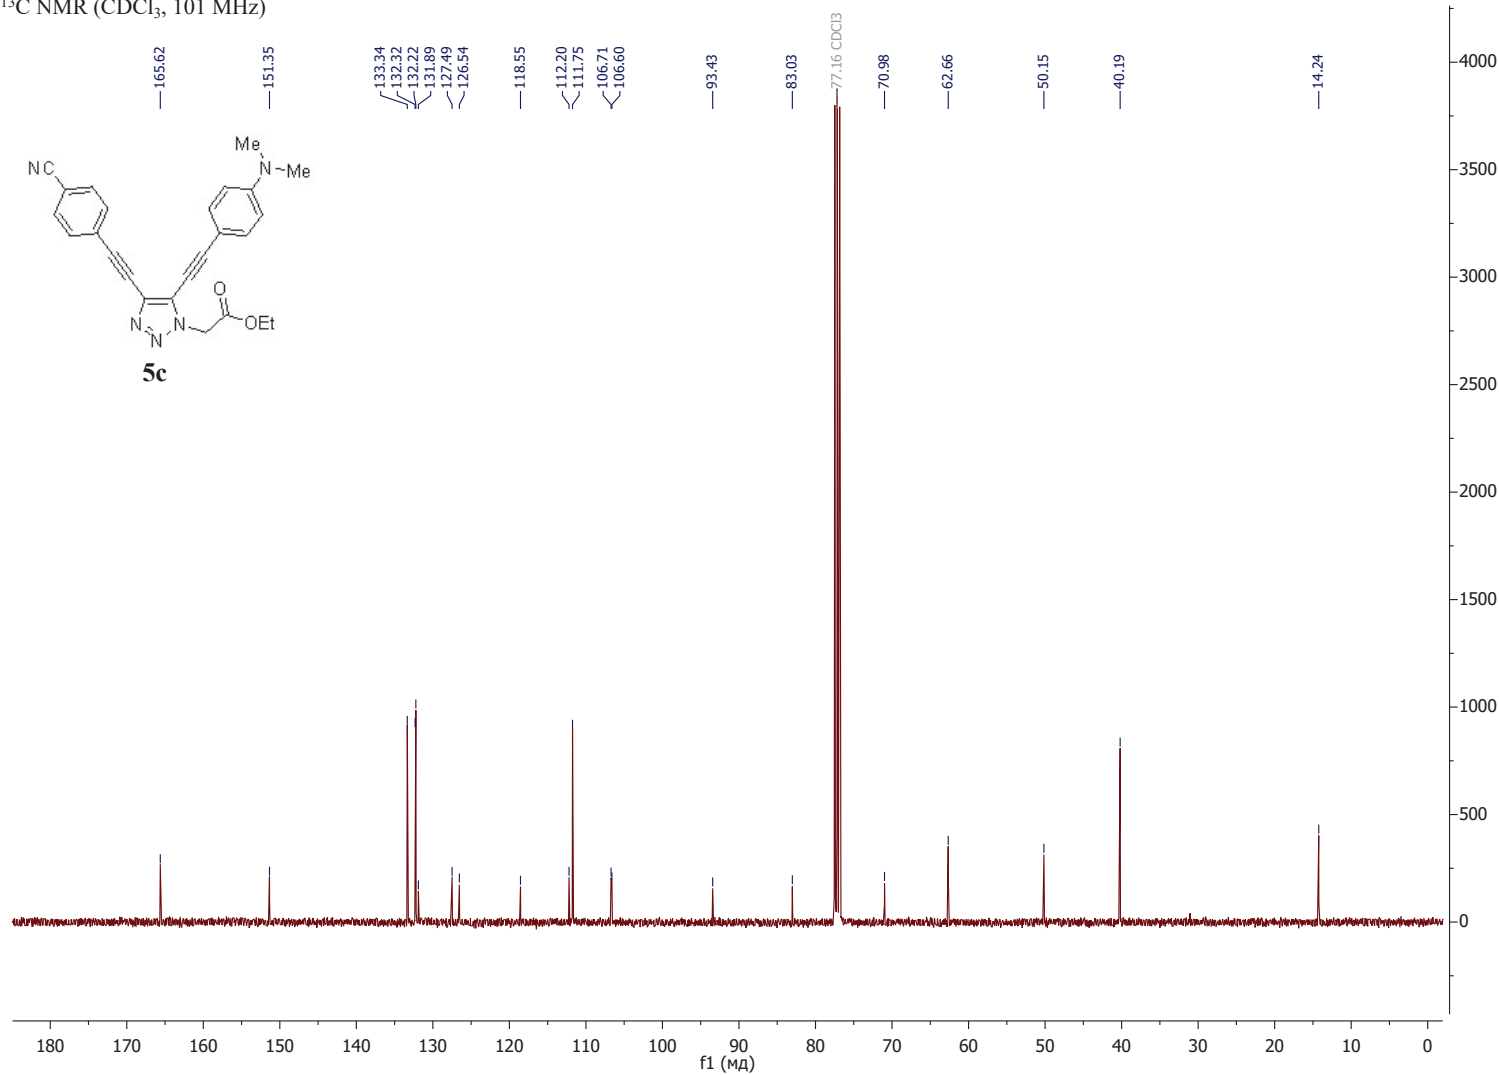

<sup>13</sup>C NMR (CDCl<sub>3</sub>, 101 MHz)

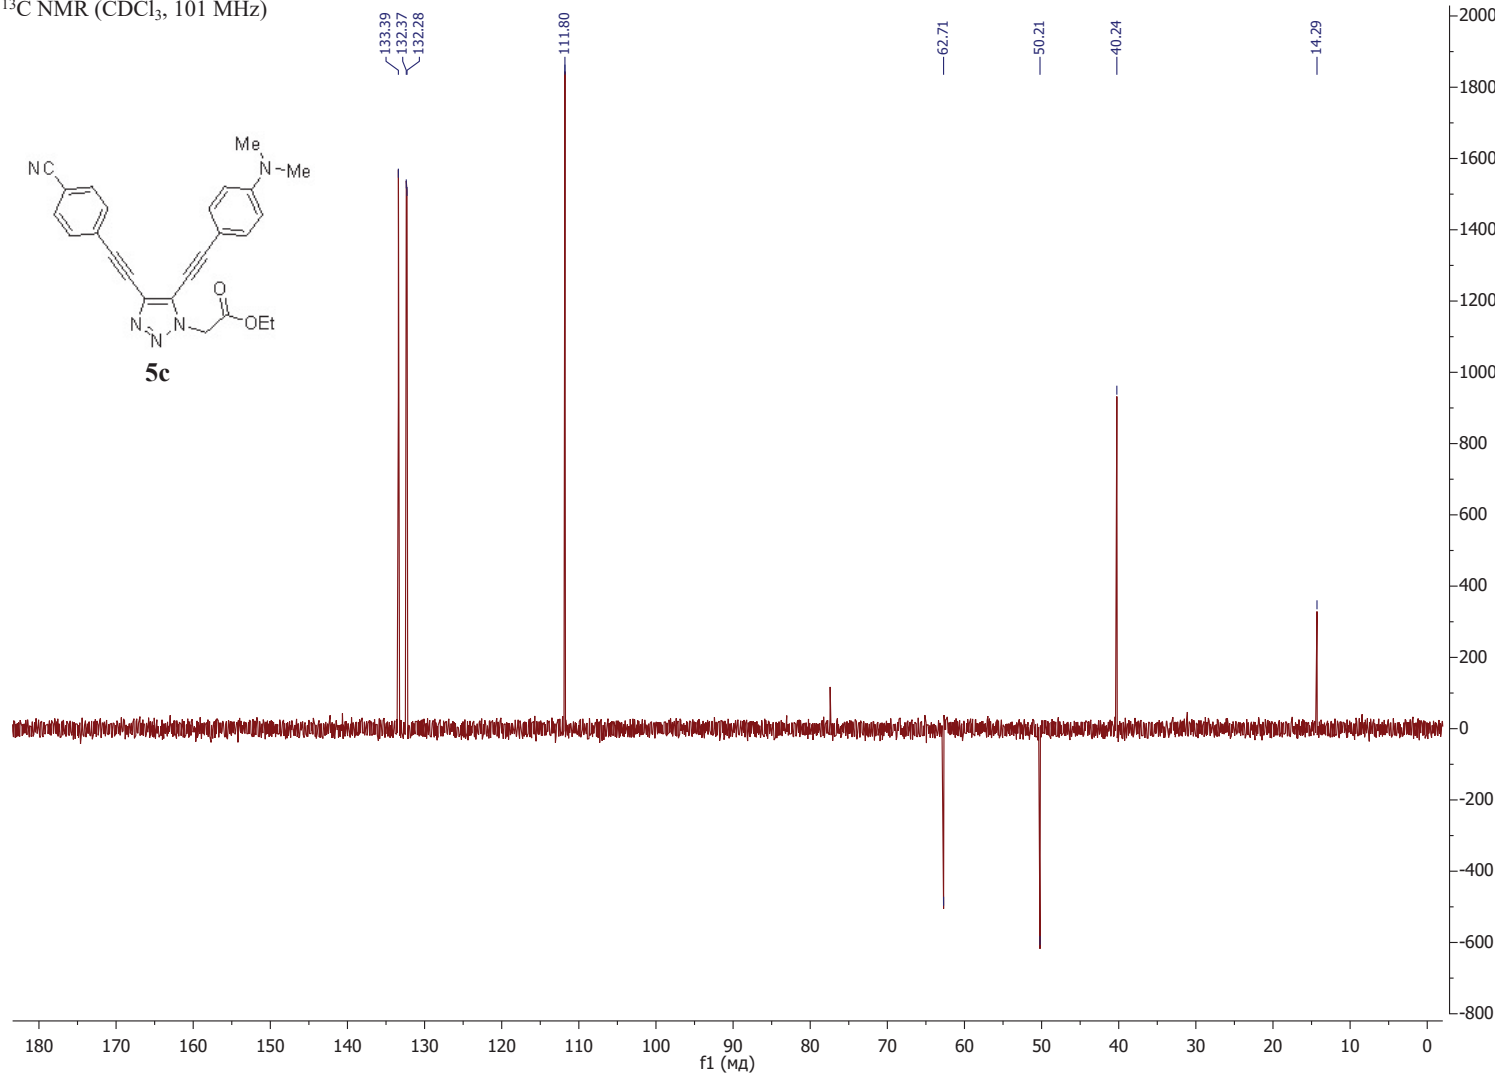

<sup>1</sup>H NMR (CDCl<sub>3</sub>, 400 MHz)

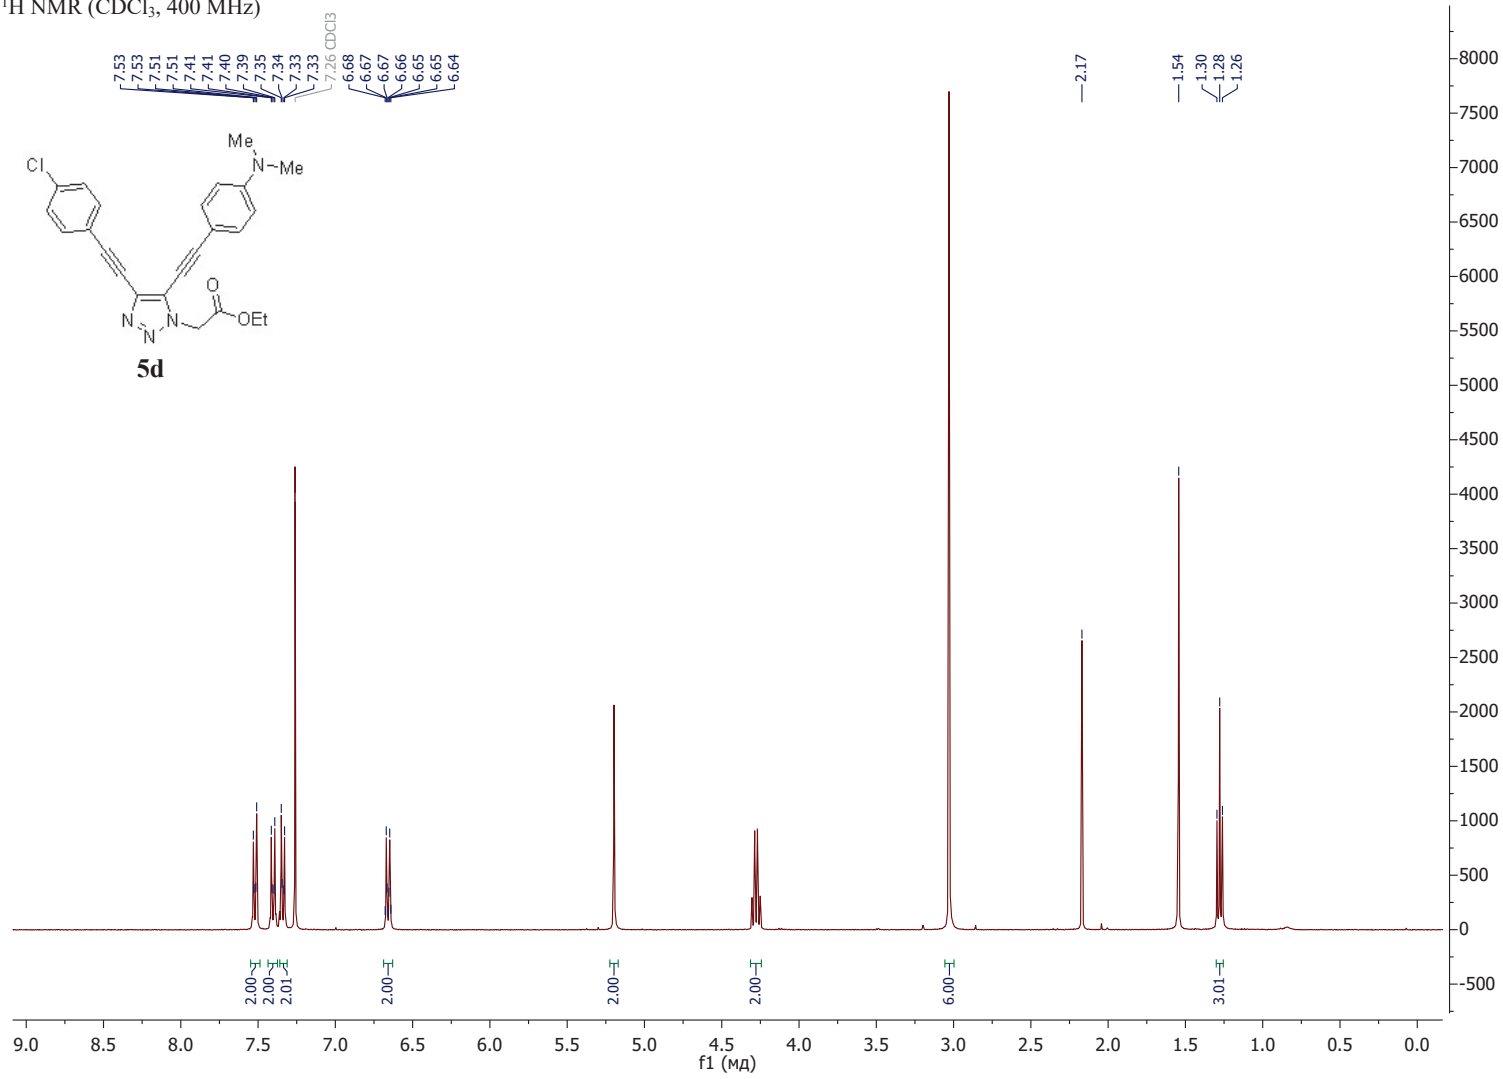

<sup>13</sup>C NMR (CDCl<sub>3</sub>, 101 MHz)

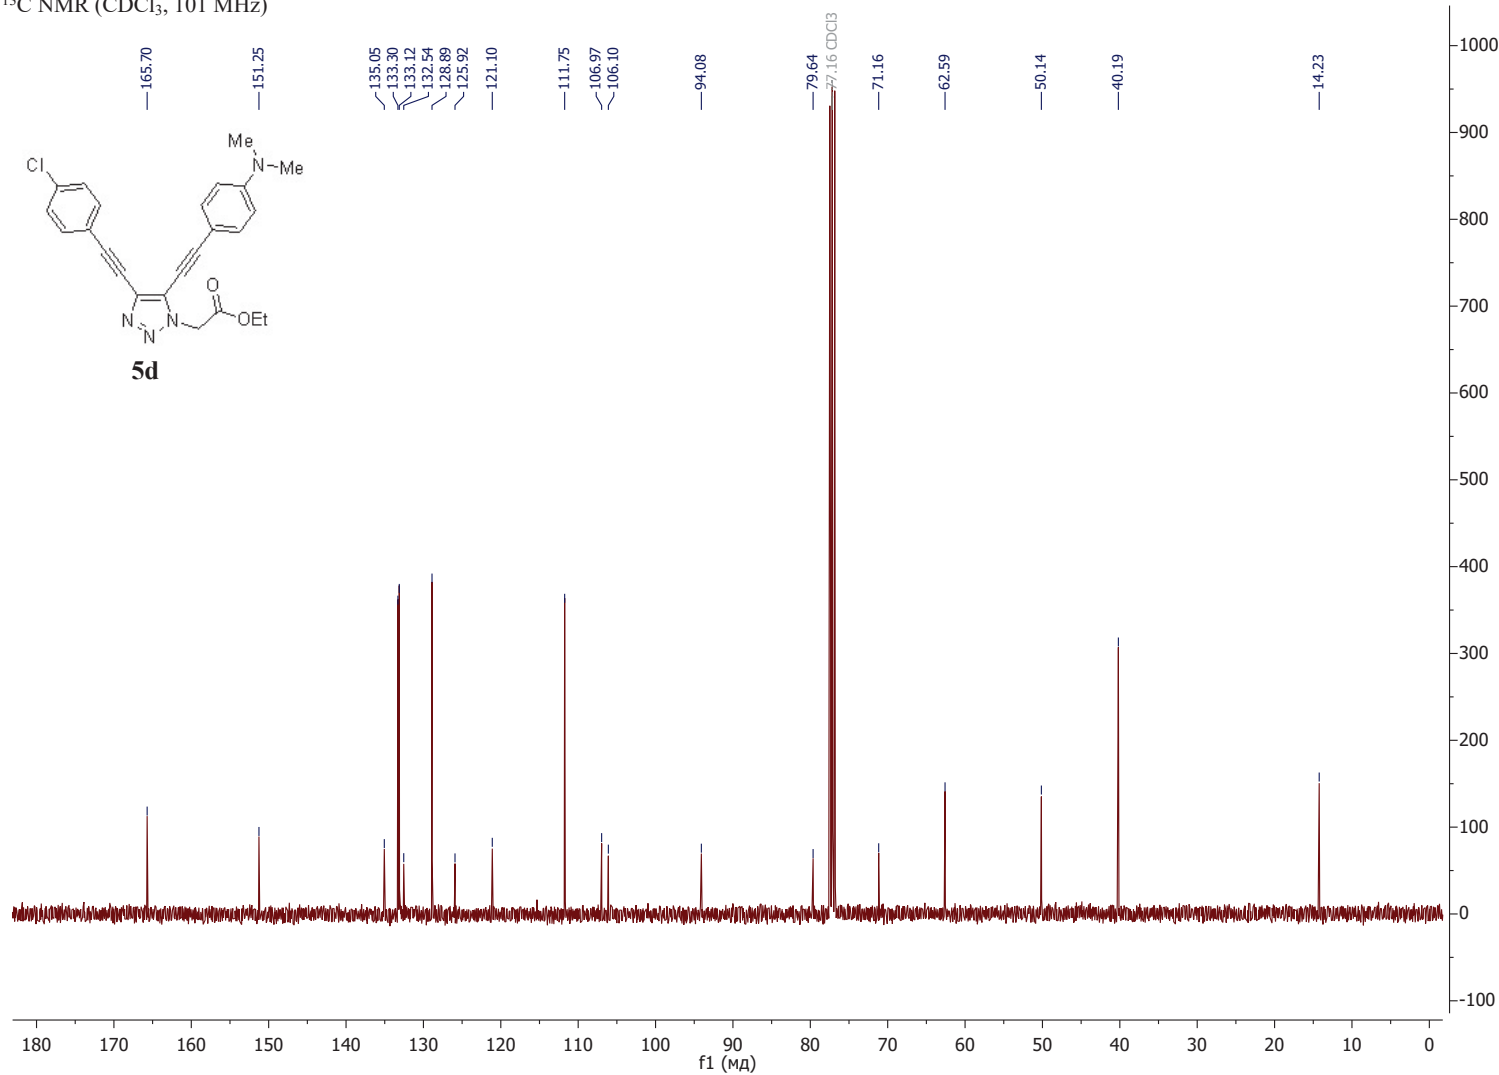

<sup>13</sup>C NMR (CDCl<sub>3</sub>, 101 MHz)

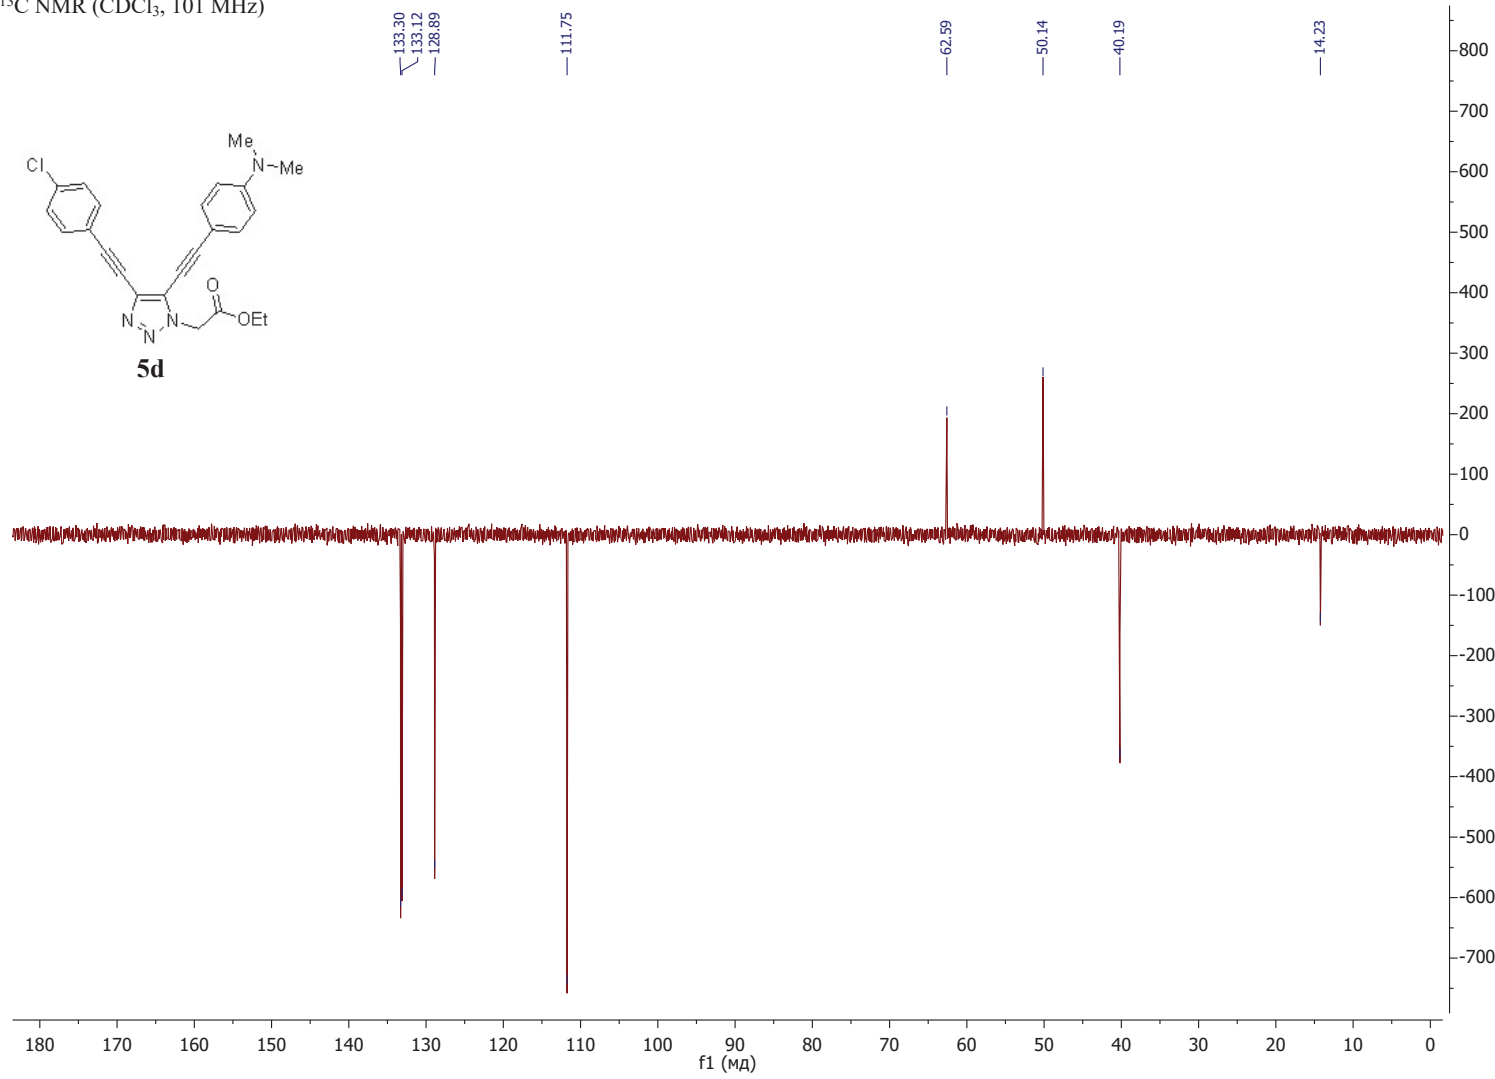



<sup>1</sup>H NMR (CDCl<sub>3</sub>, 400 MHz)

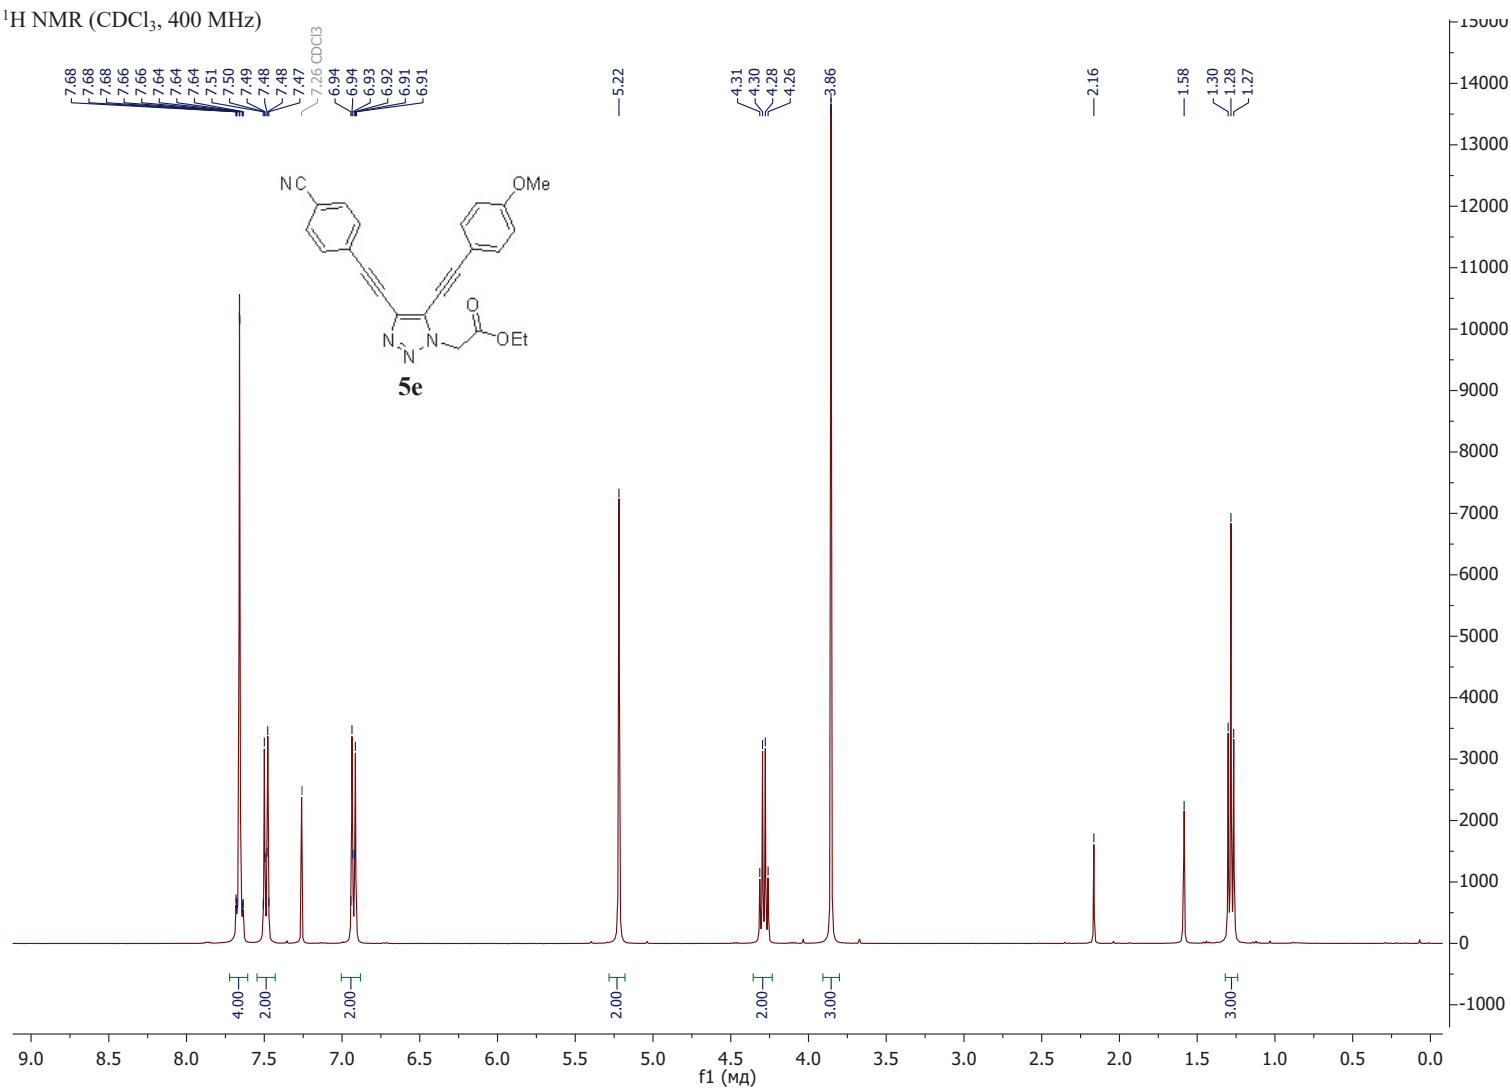

<sup>13</sup>C NMR (CDCl<sub>3</sub>, 101 MHz)

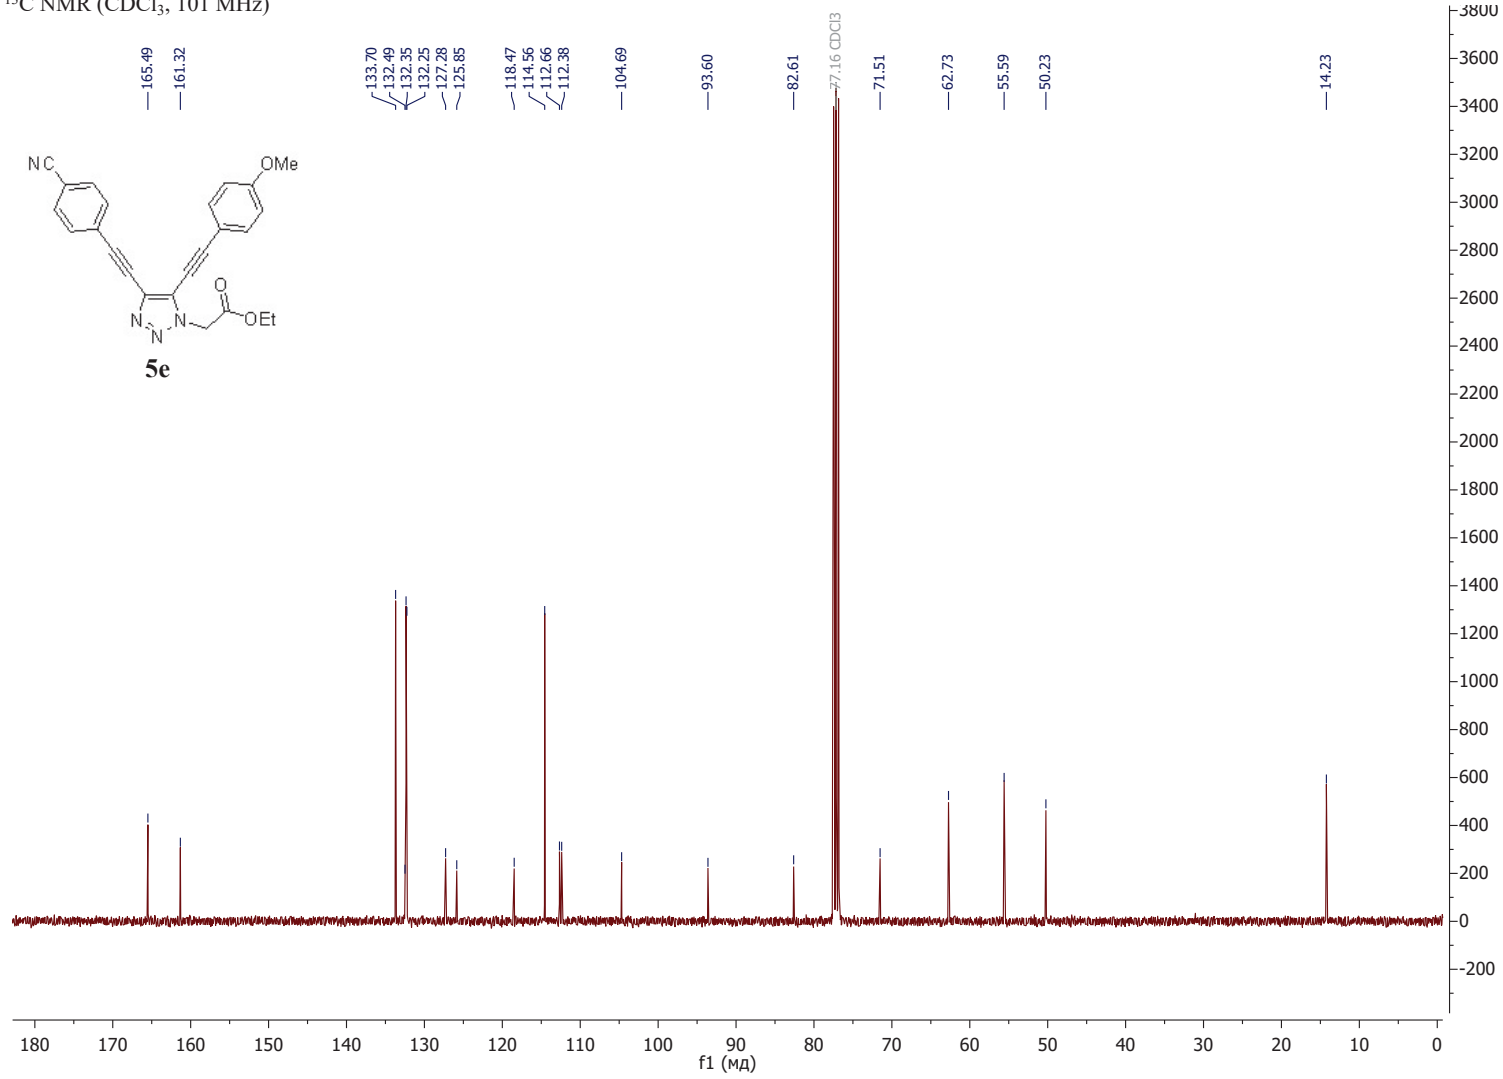

<sup>13</sup>C NMR (CDCl<sub>3</sub>, 101 MHz)

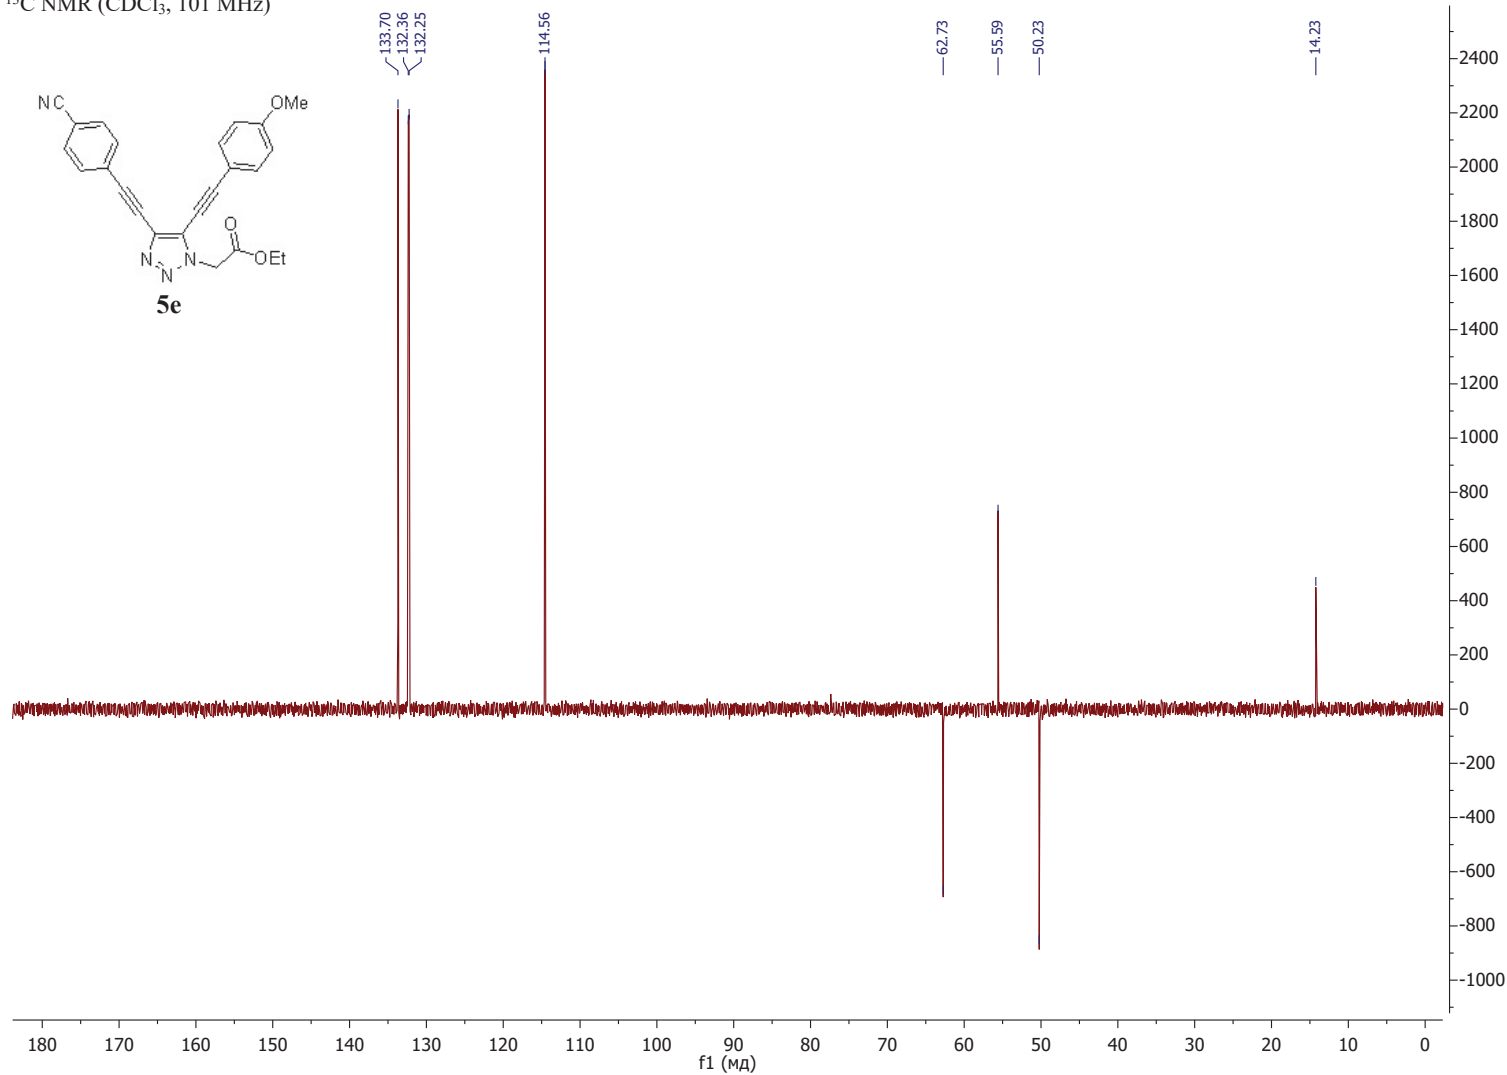

<sup>1</sup>H NMR (CDCl<sub>3</sub>, 400 MHz)

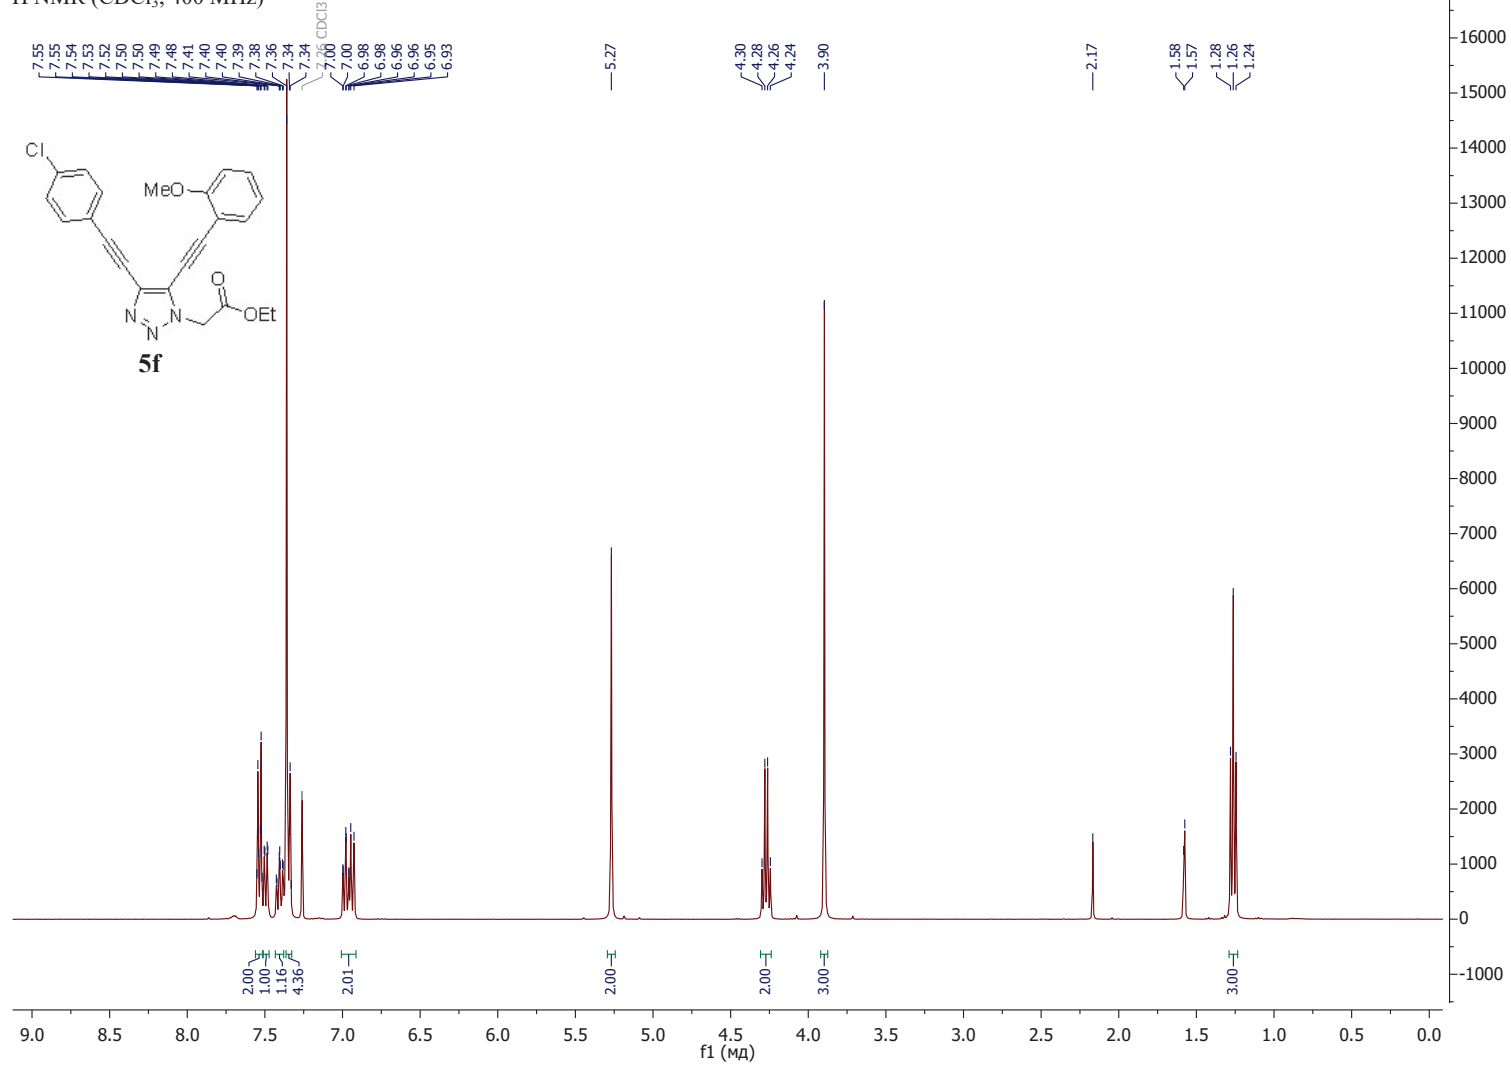

<sup>13</sup>C NMR (CDCl<sub>3</sub>, 101 MHz)

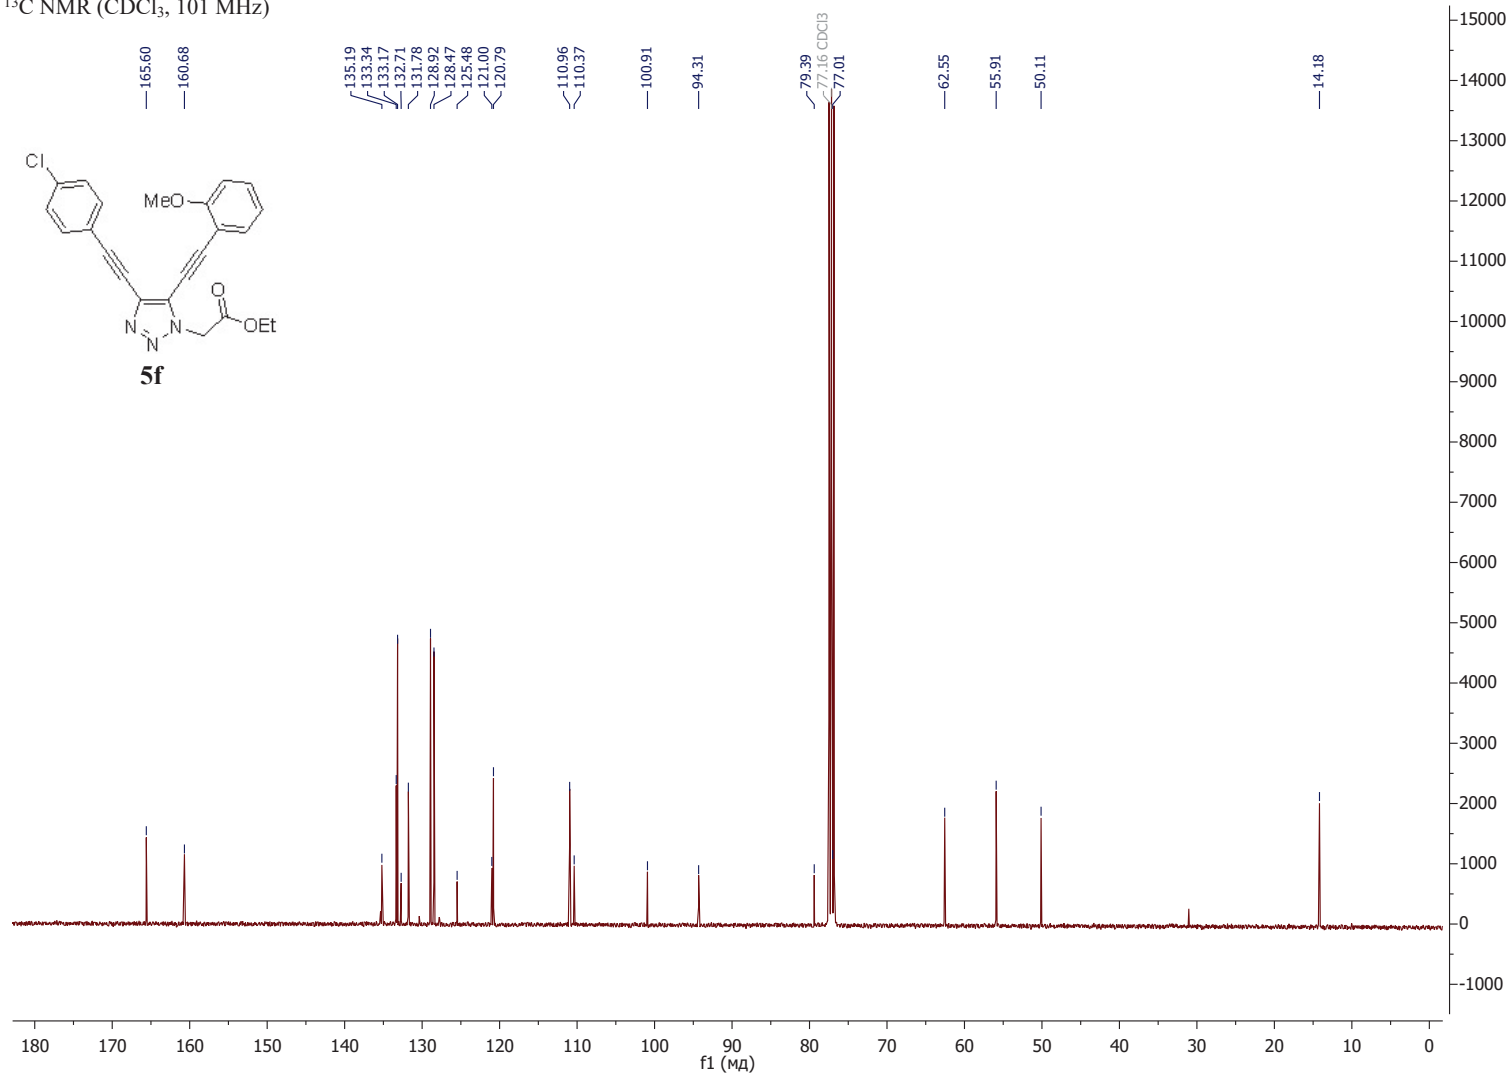

$^{13}\text{C}$  NMR ( $\text{CDCl}_3$ , 101 MHz)

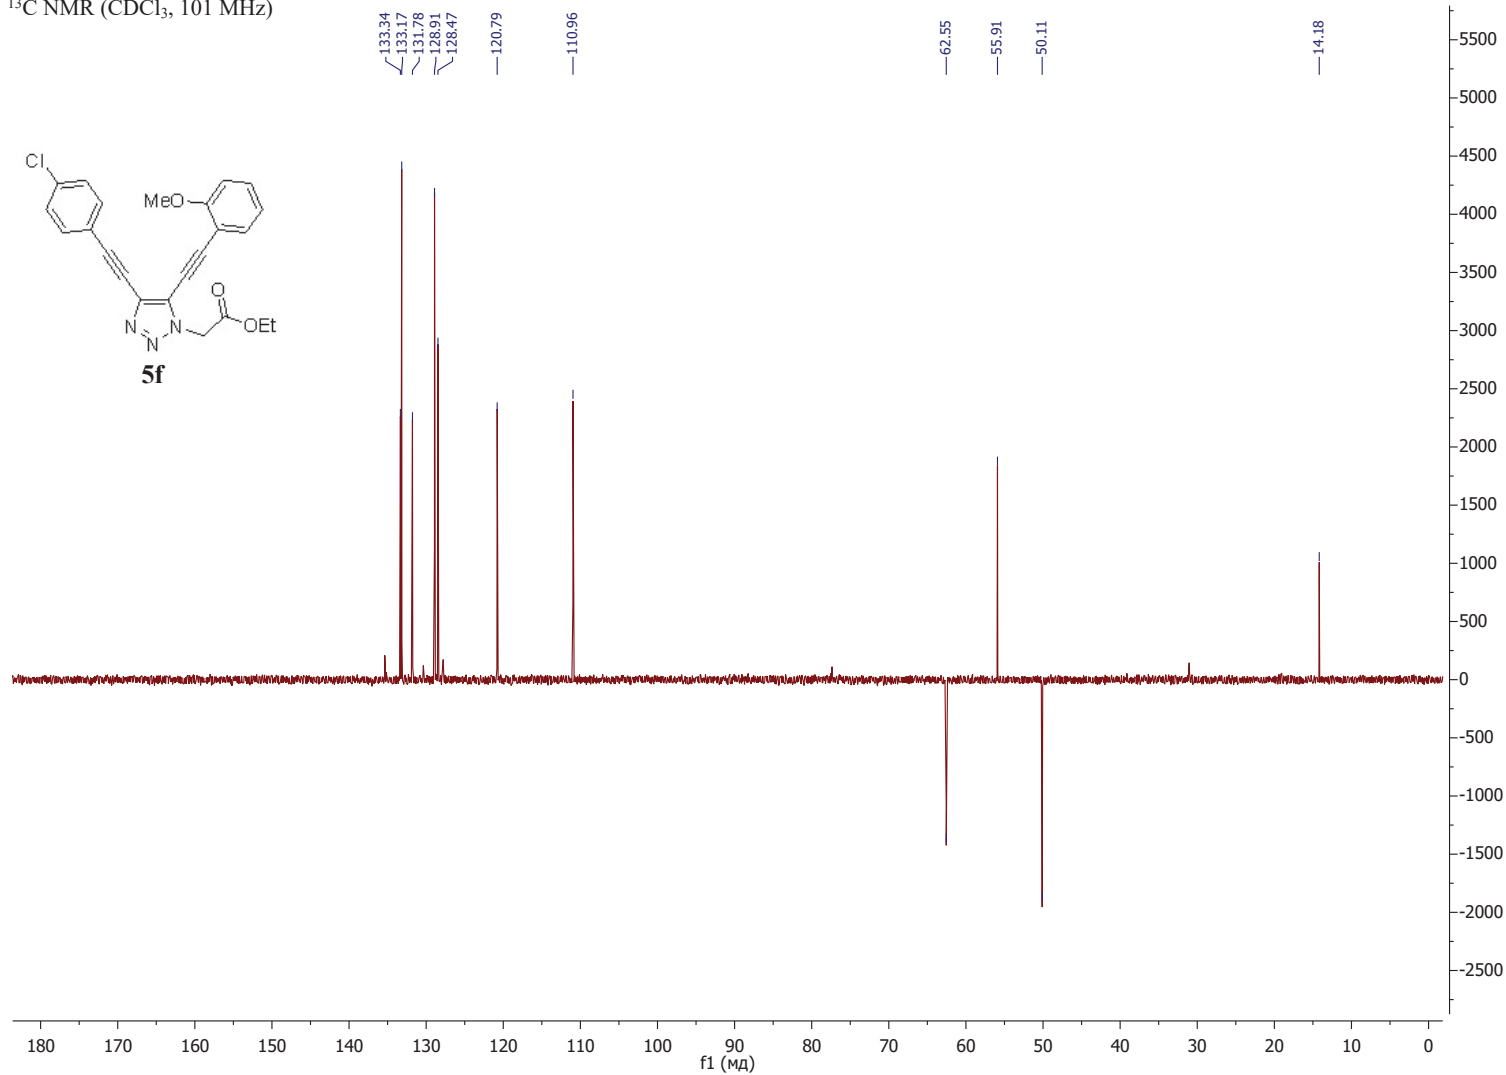

<sup>1</sup>H NMR (CDCl<sub>3</sub>, 400 MHz)

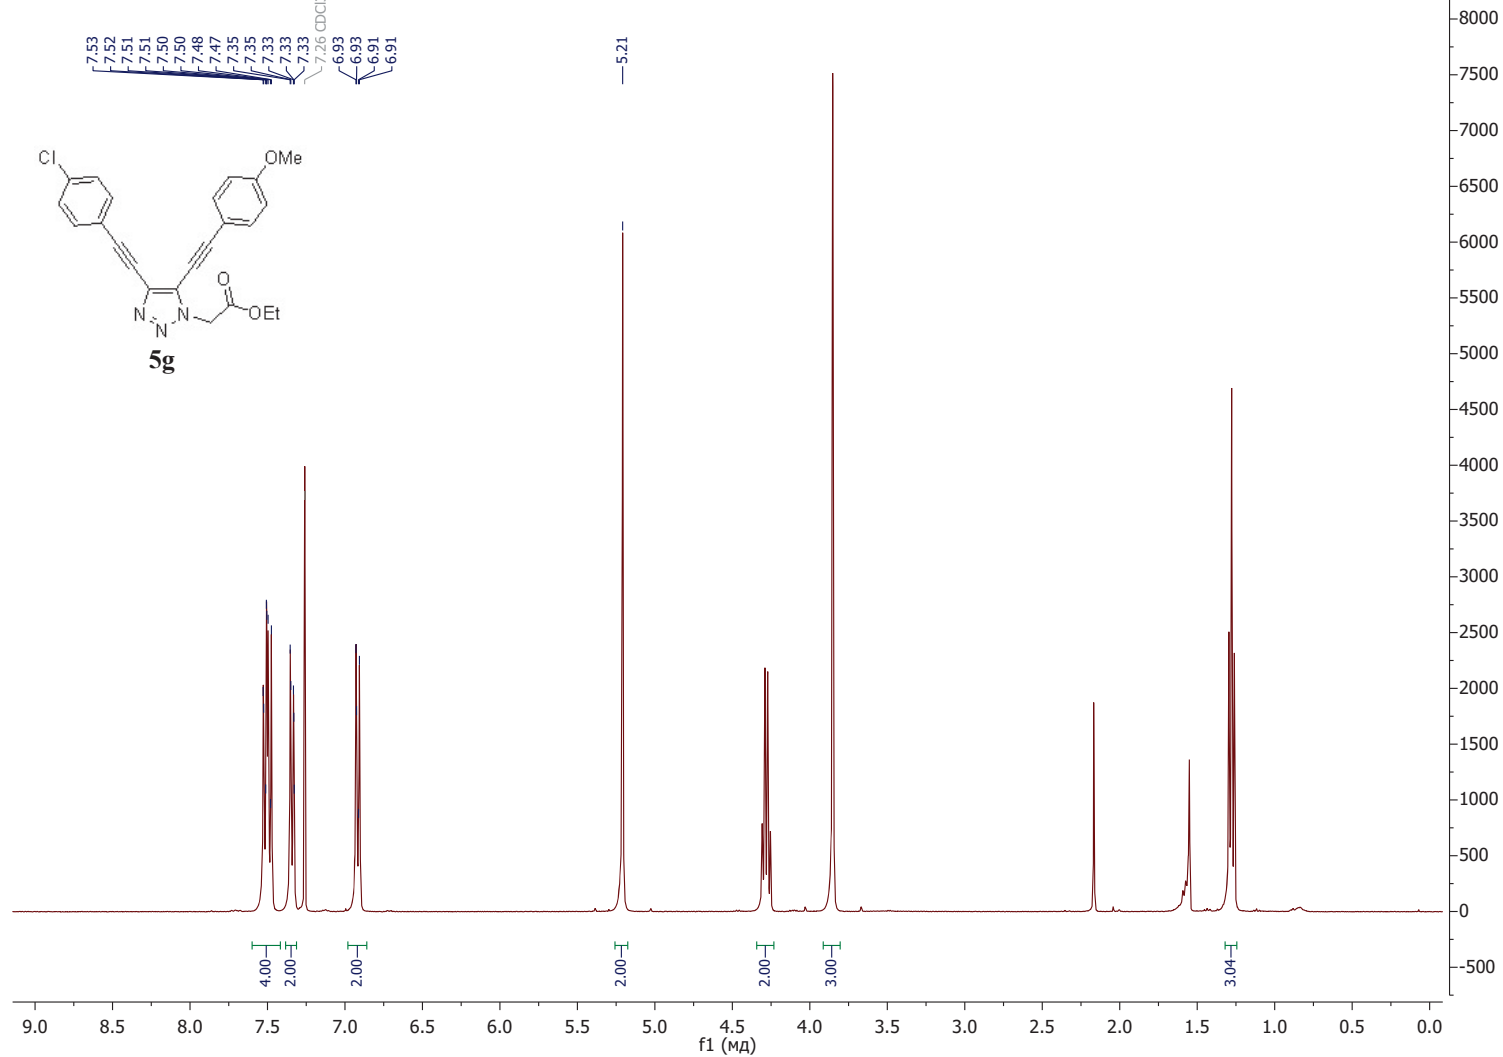

<sup>13</sup>C NMR (CDCl<sub>3</sub>, 101 MHz)

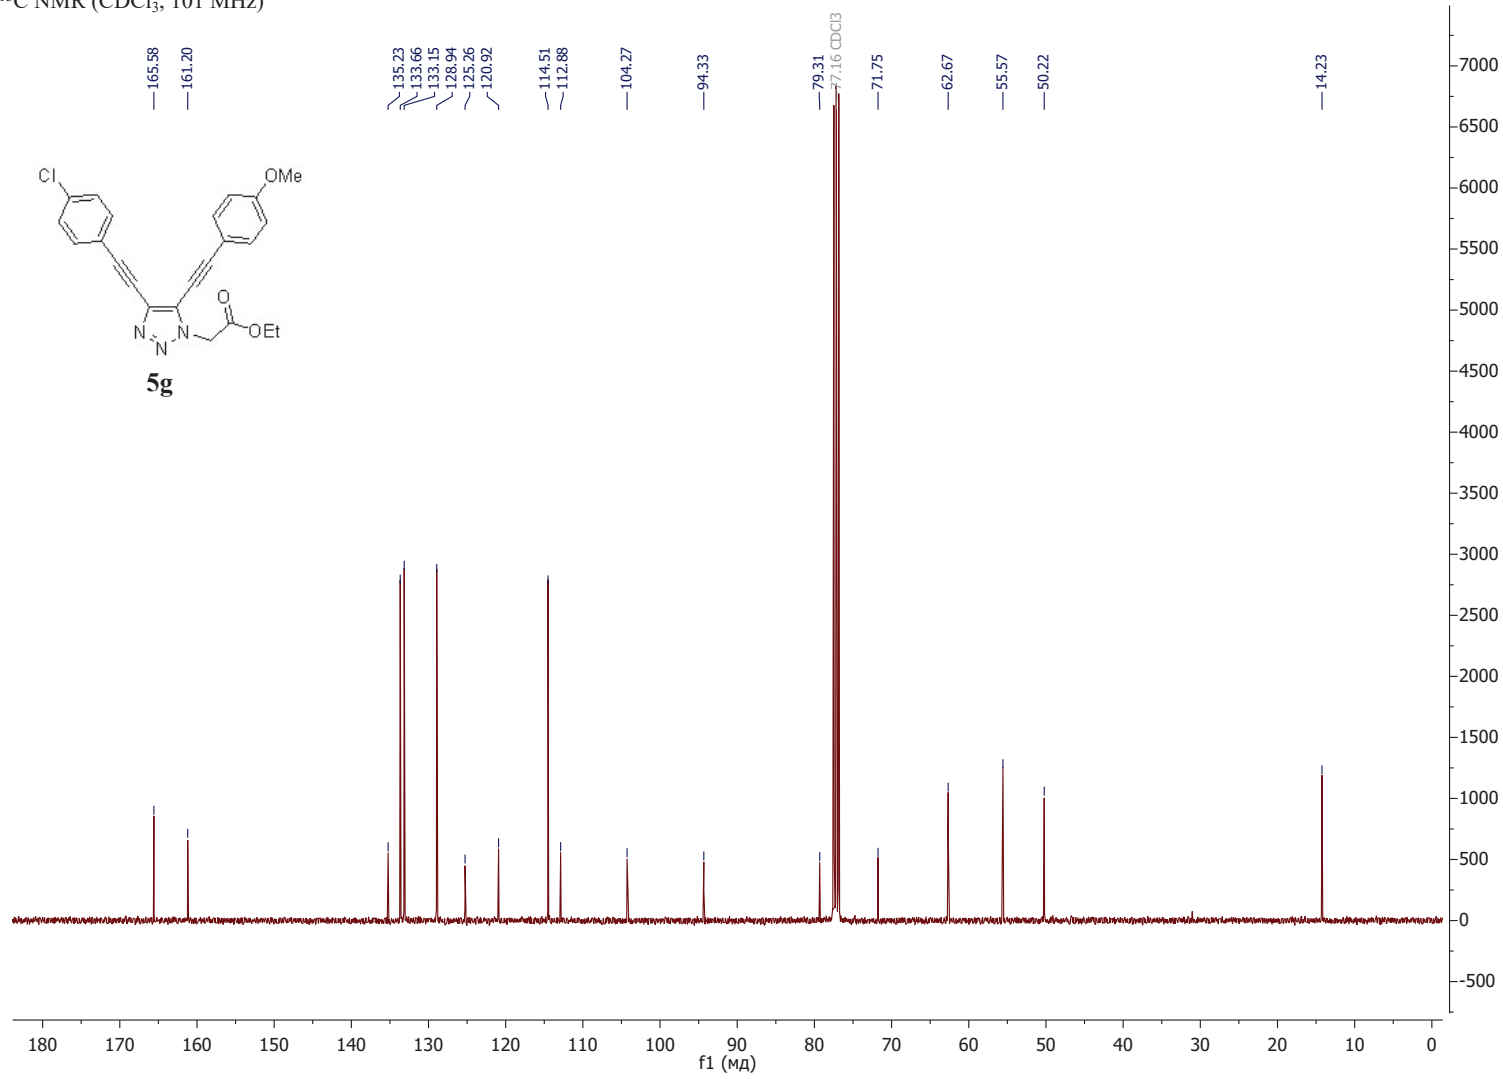



<sup>13</sup>C NMR (CDCl<sub>3</sub>, 101 MHz)

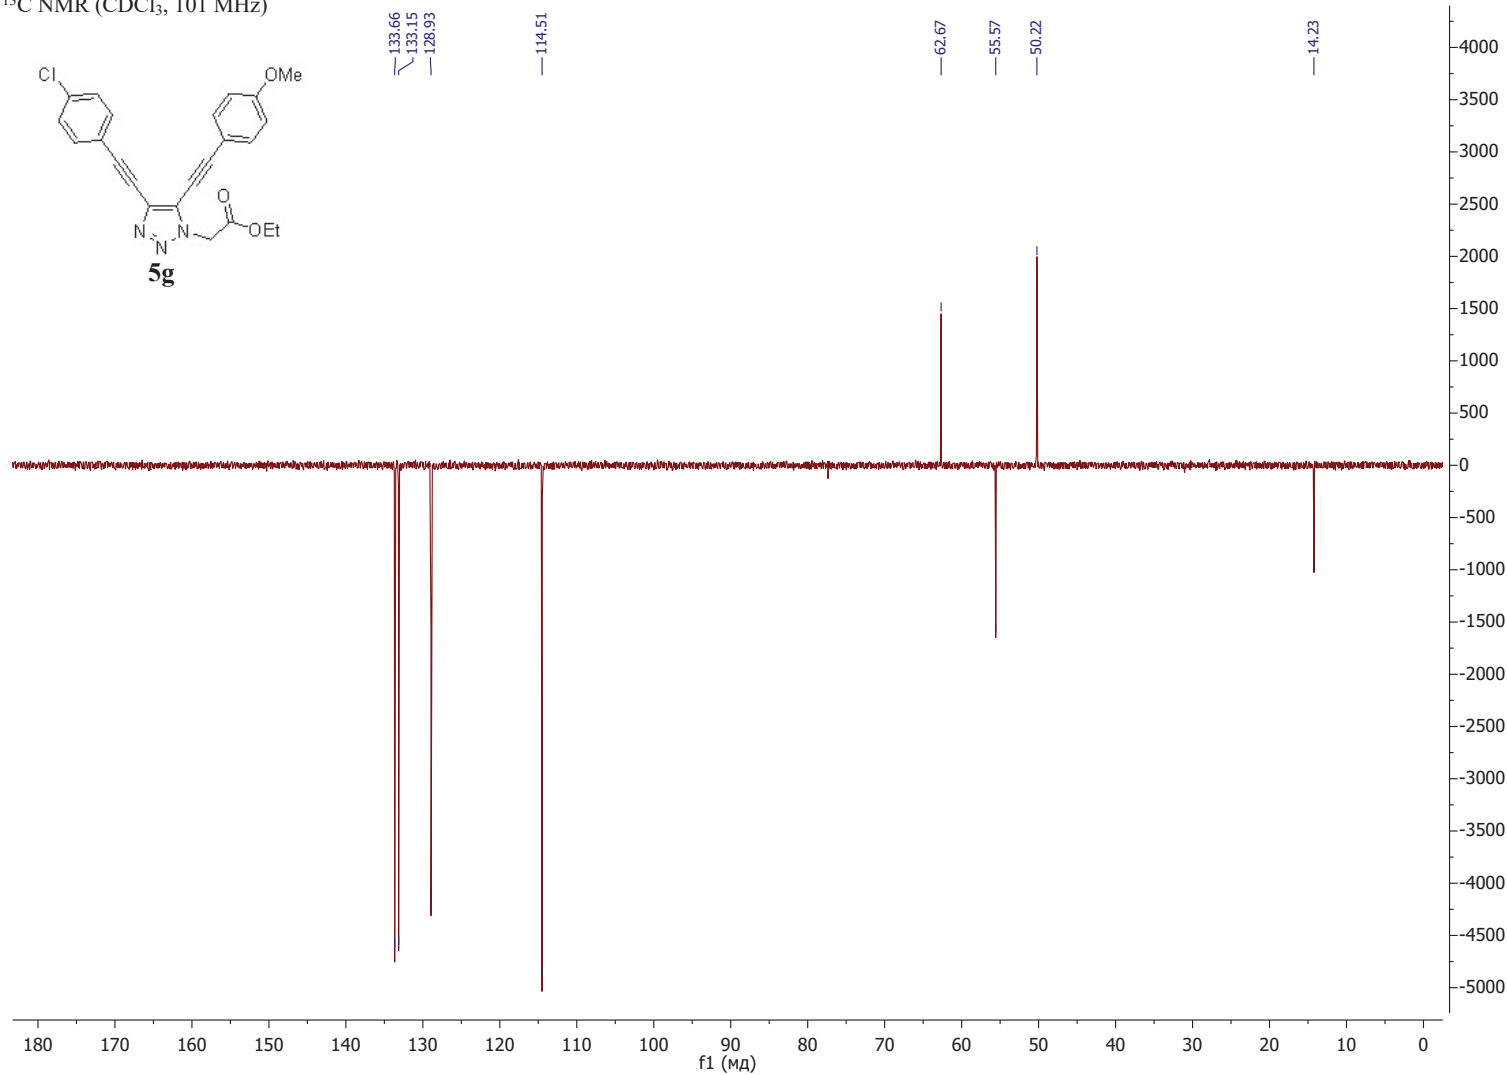

<sup>1</sup>H NMR (CDCl<sub>3</sub>, 400 MHz)

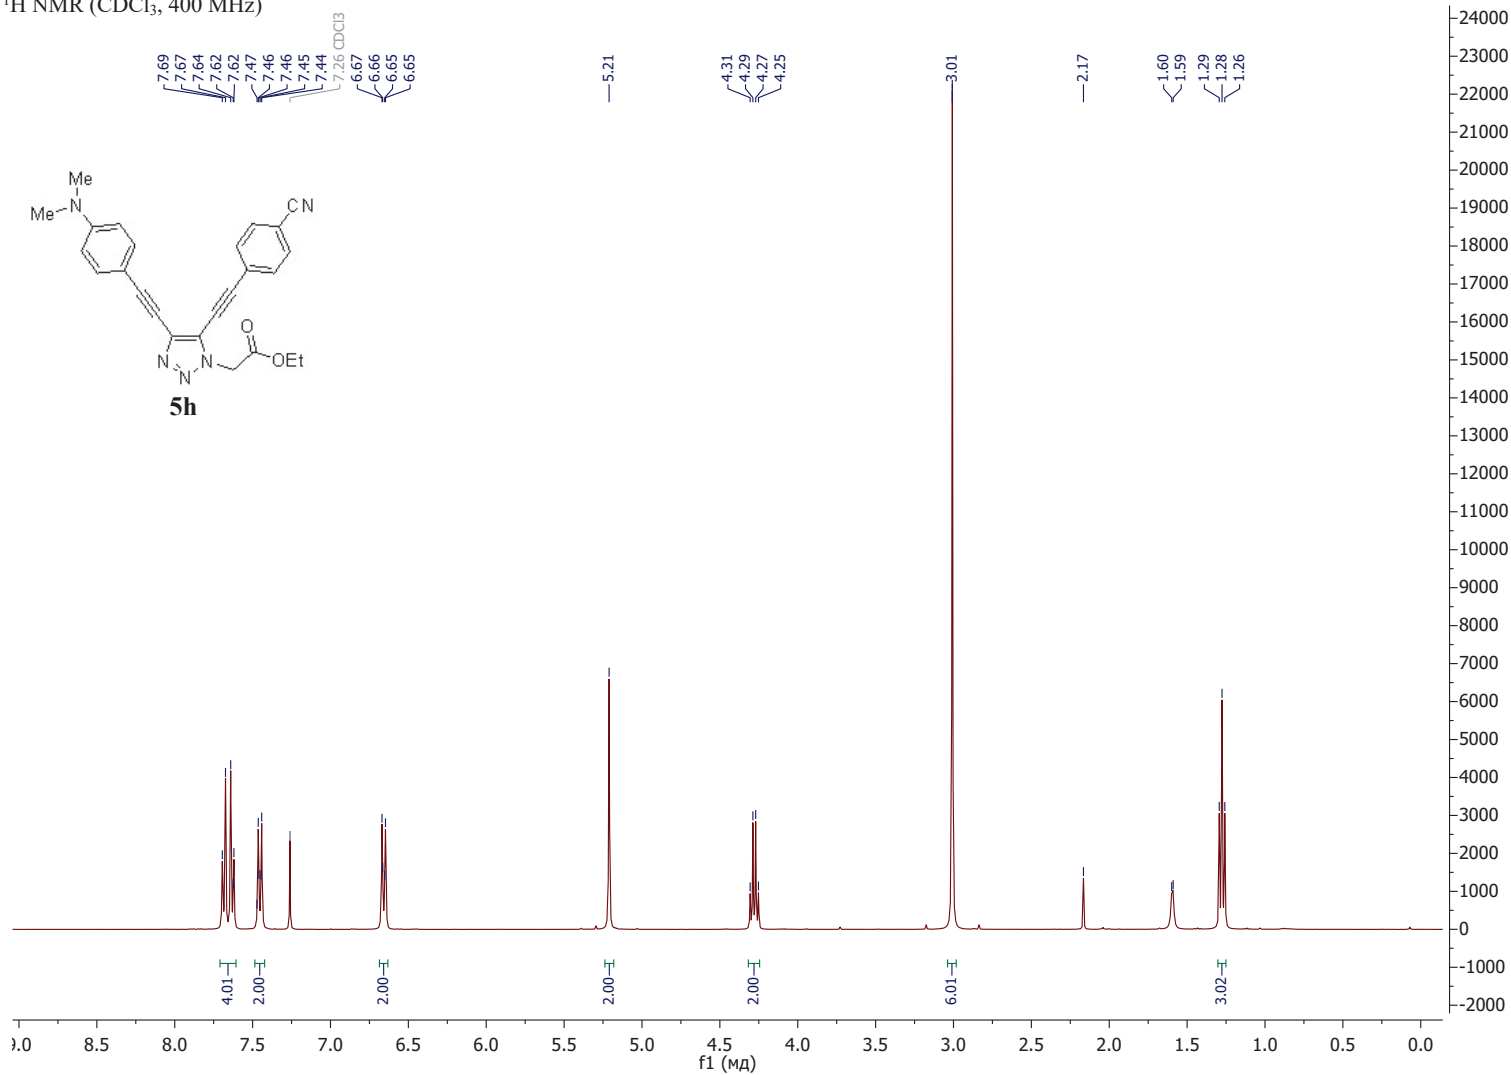

<sup>13</sup>C NMR (CDCl<sub>3</sub>, 101 MHz)

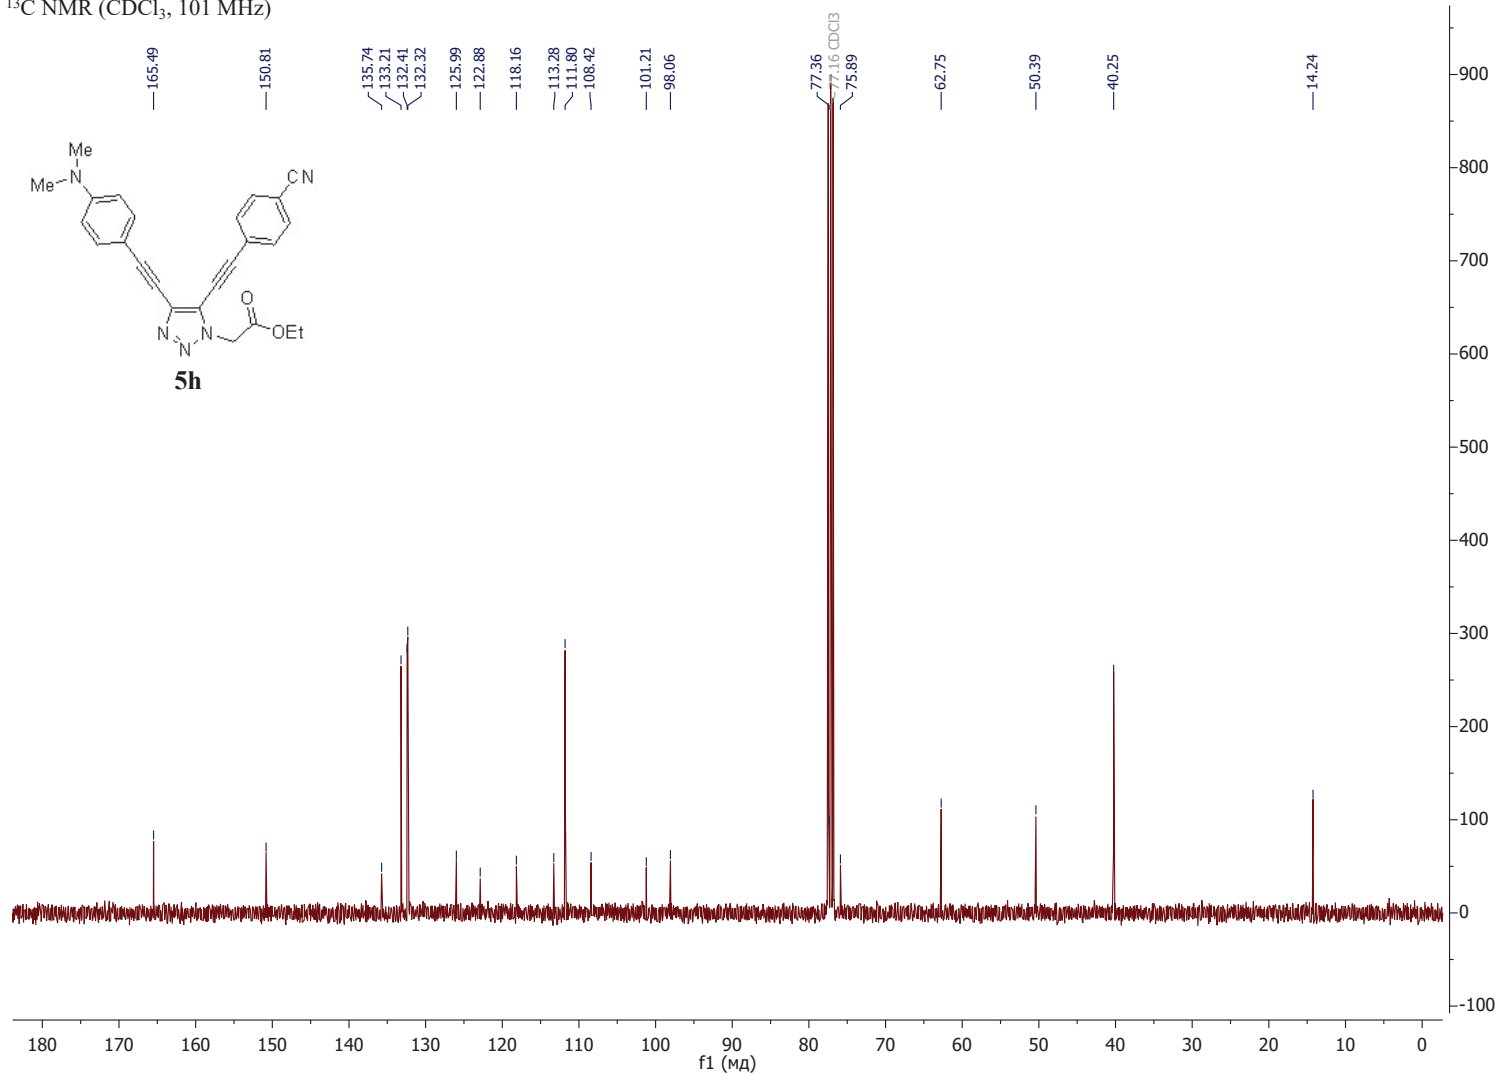

<sup>13</sup>C NMR (CDCl<sub>3</sub>, 101 MHz)

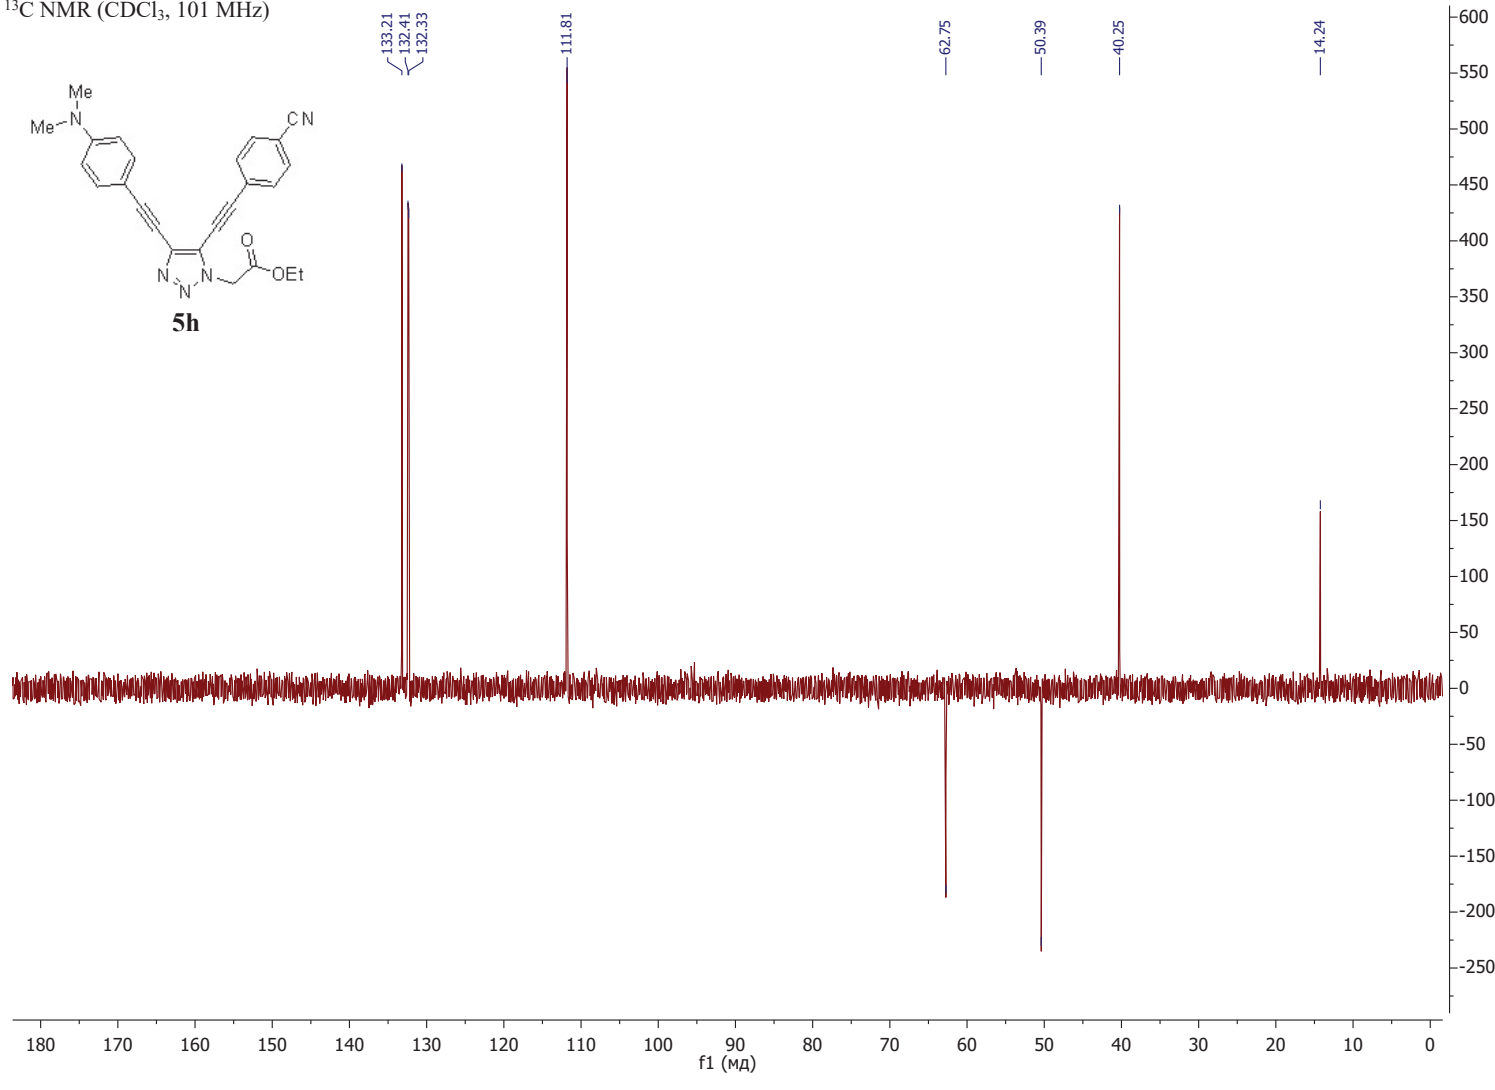

<sup>1</sup>H NMR (CDCl<sub>3</sub>, 400 MHz)

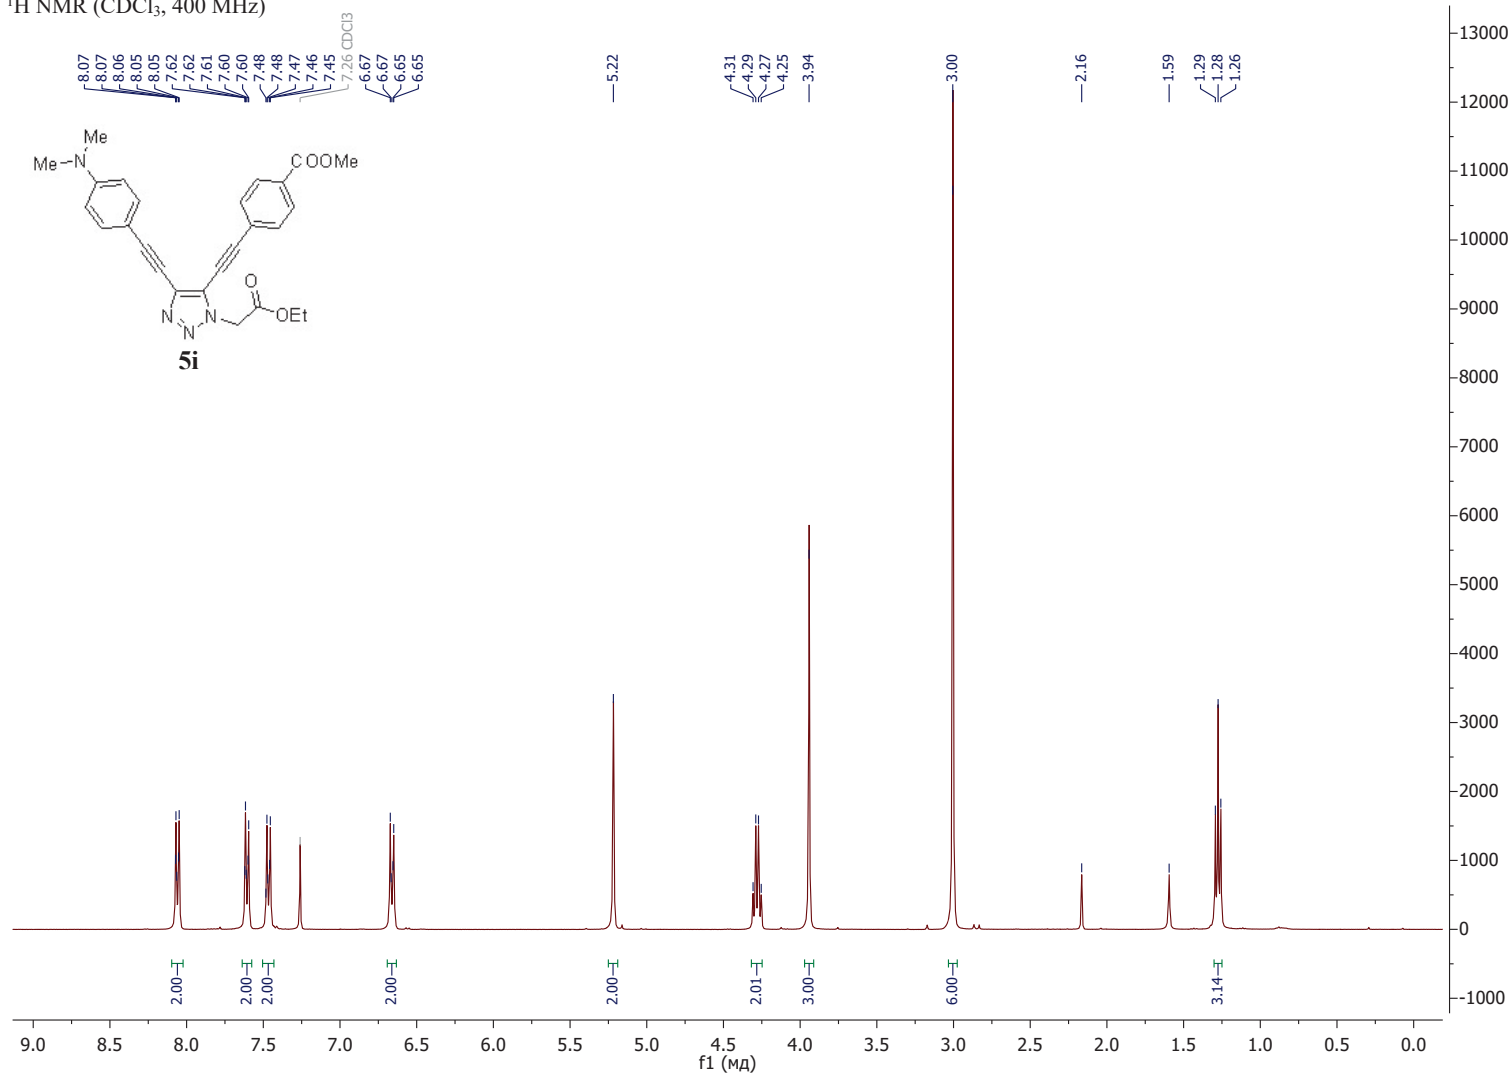

<sup>13</sup>C NMR (CDCl<sub>3</sub>, 101 MHz)

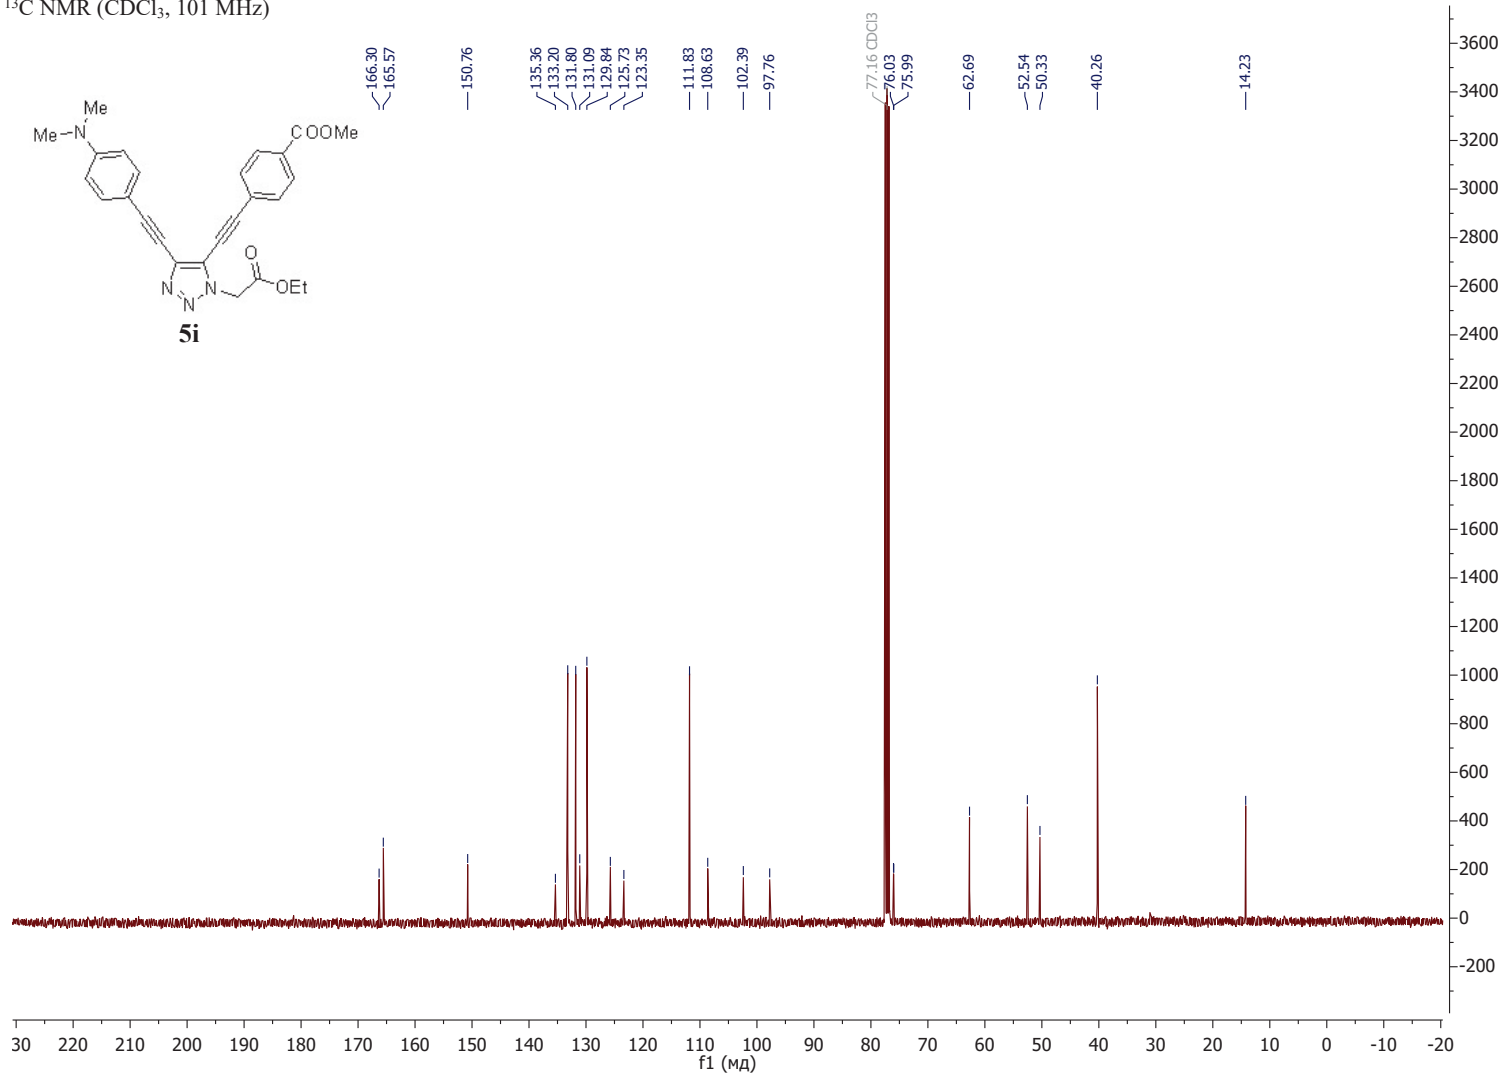

<sup>13</sup>C NMR (CDCl<sub>3</sub>, 101 MHz)

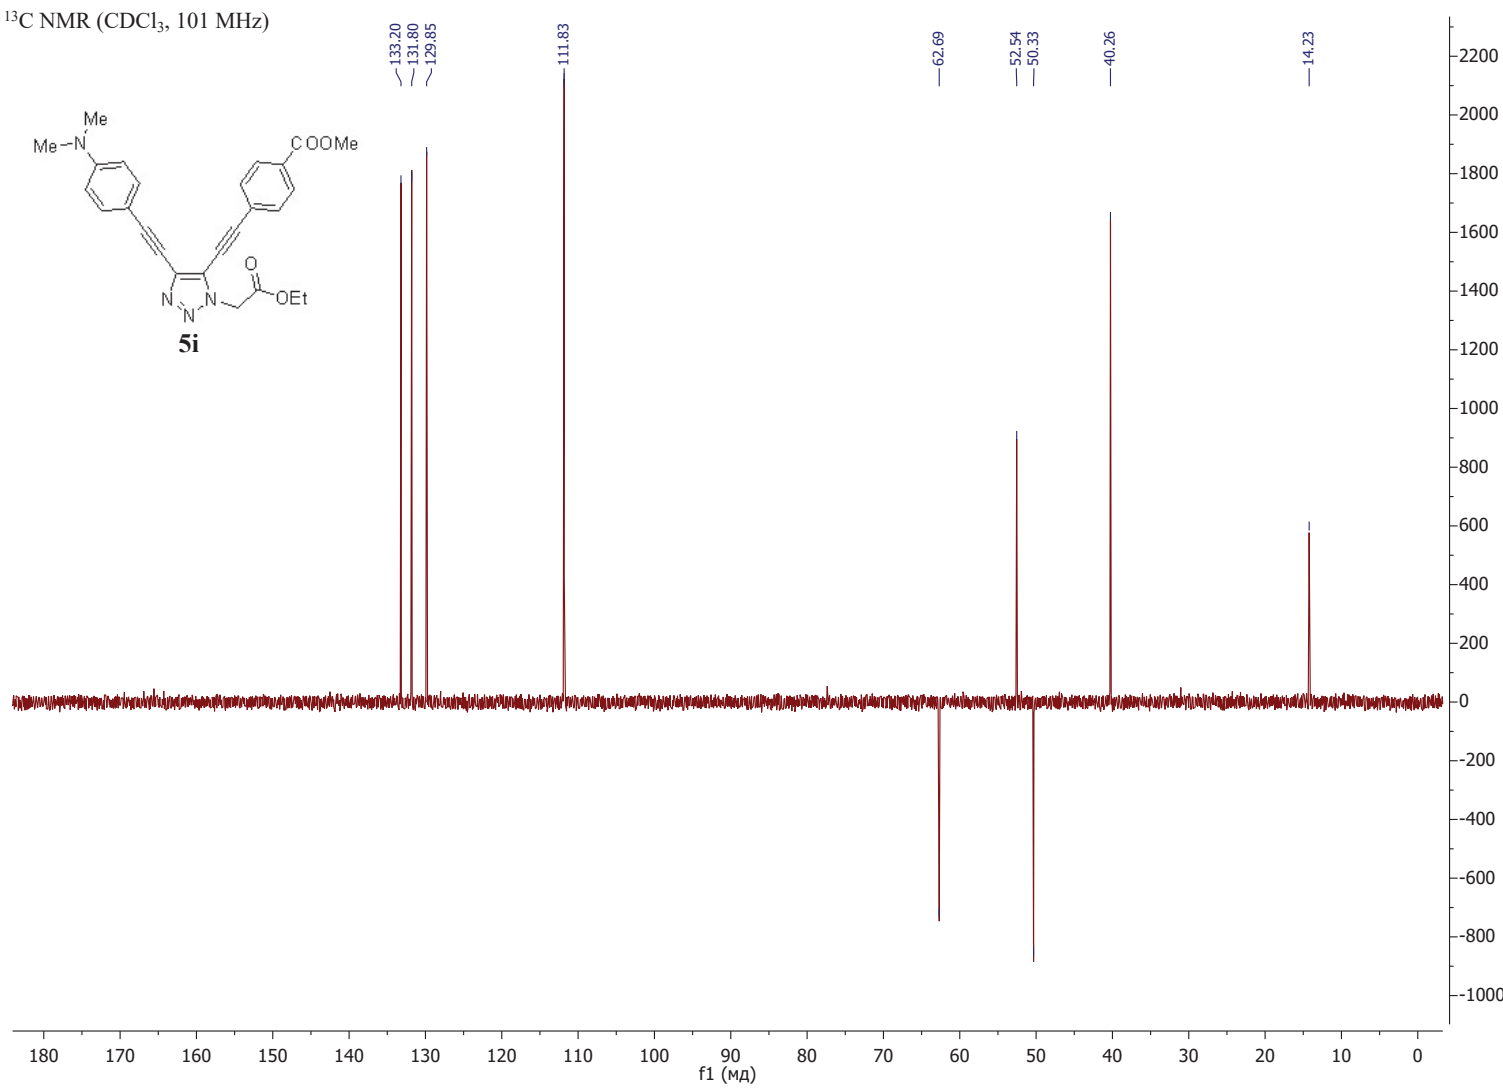

<sup>1</sup>H NMR (CDCl<sub>3</sub>, 400 MHz)

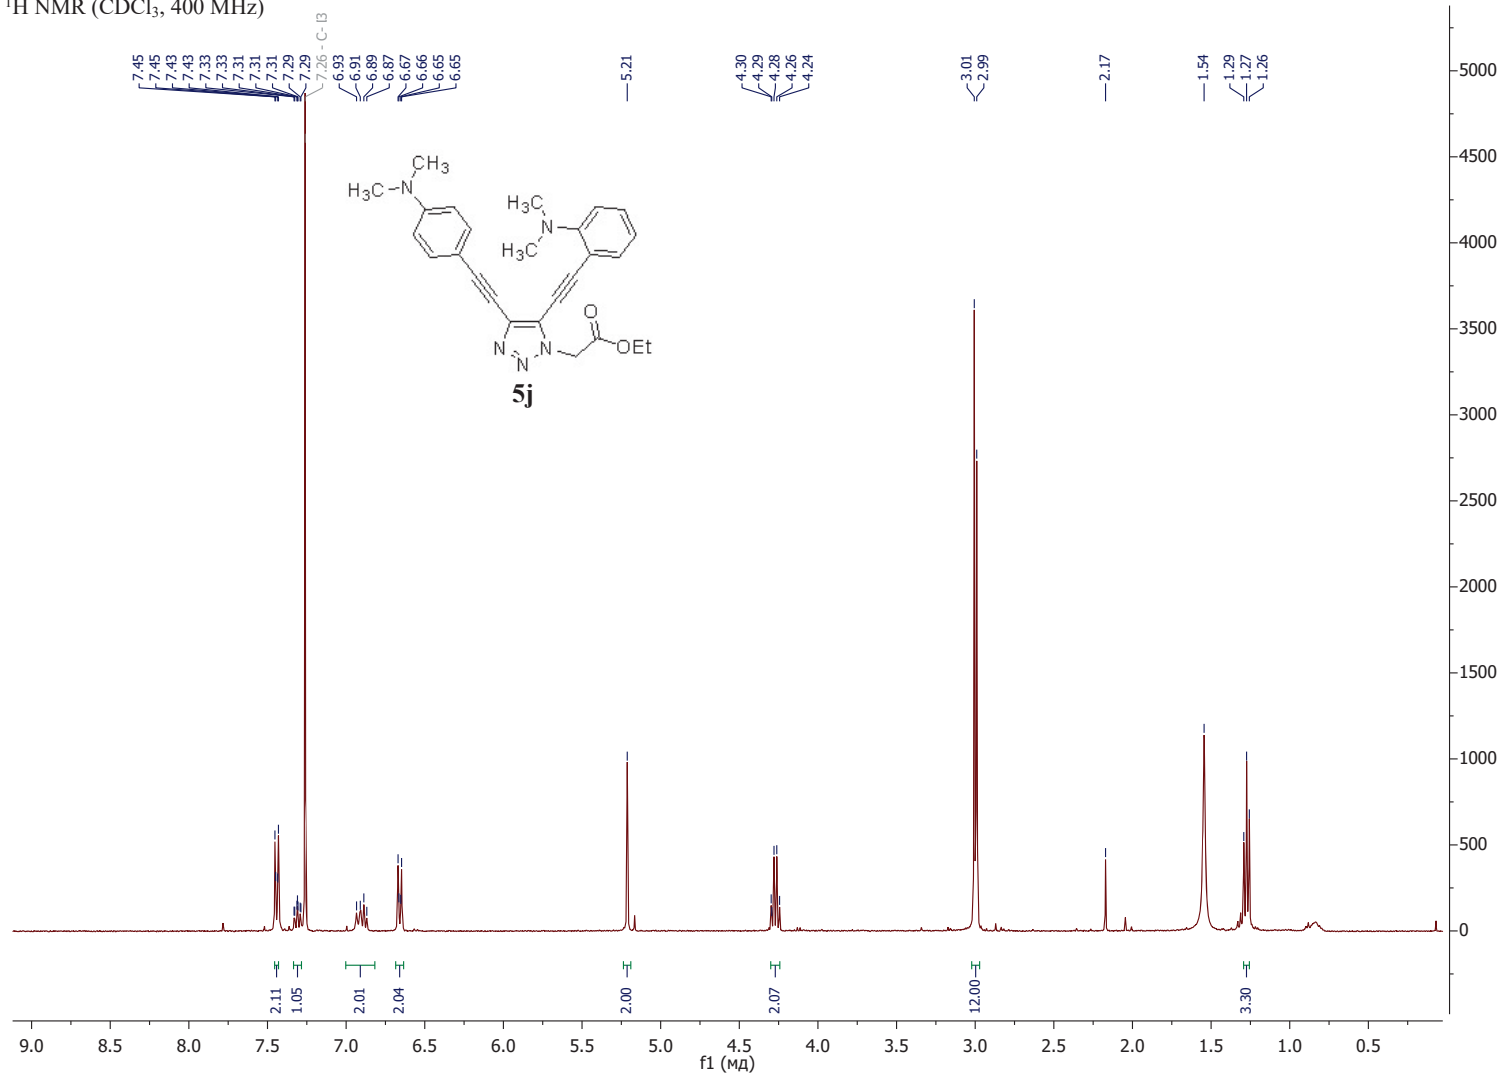



<sup>13</sup>C NMR (CDCl<sub>3</sub>, 126 MHz)

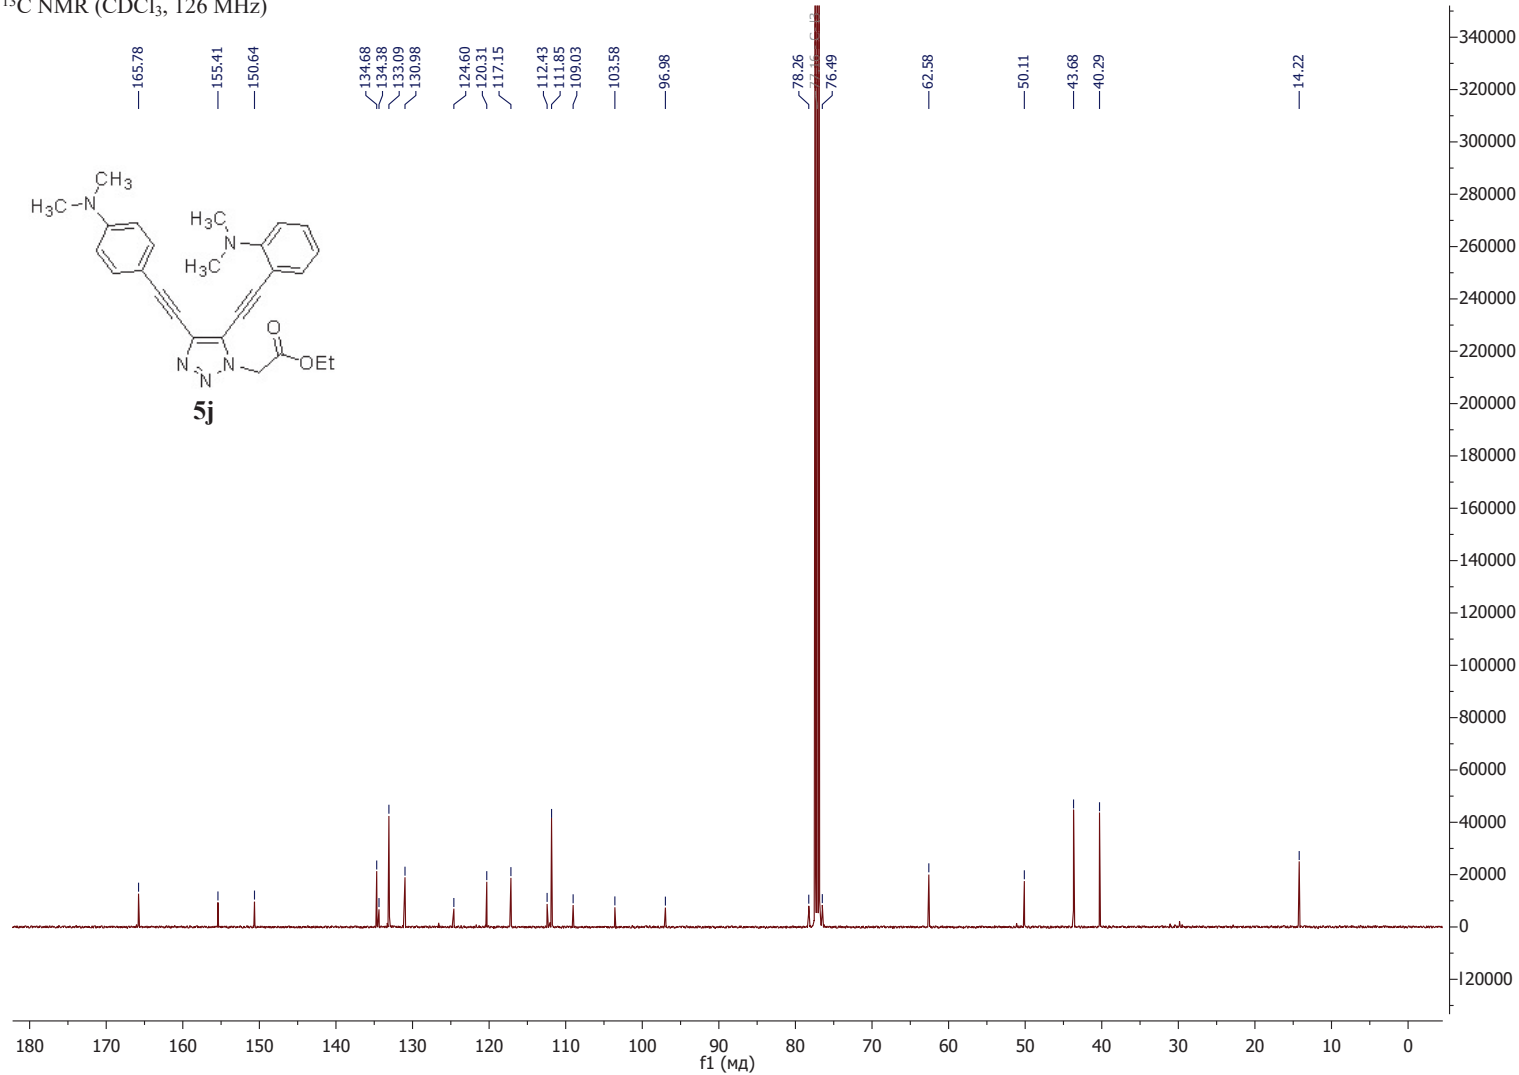

<sup>13</sup>C NMR (CDCl<sub>3</sub>, 126 MHz)

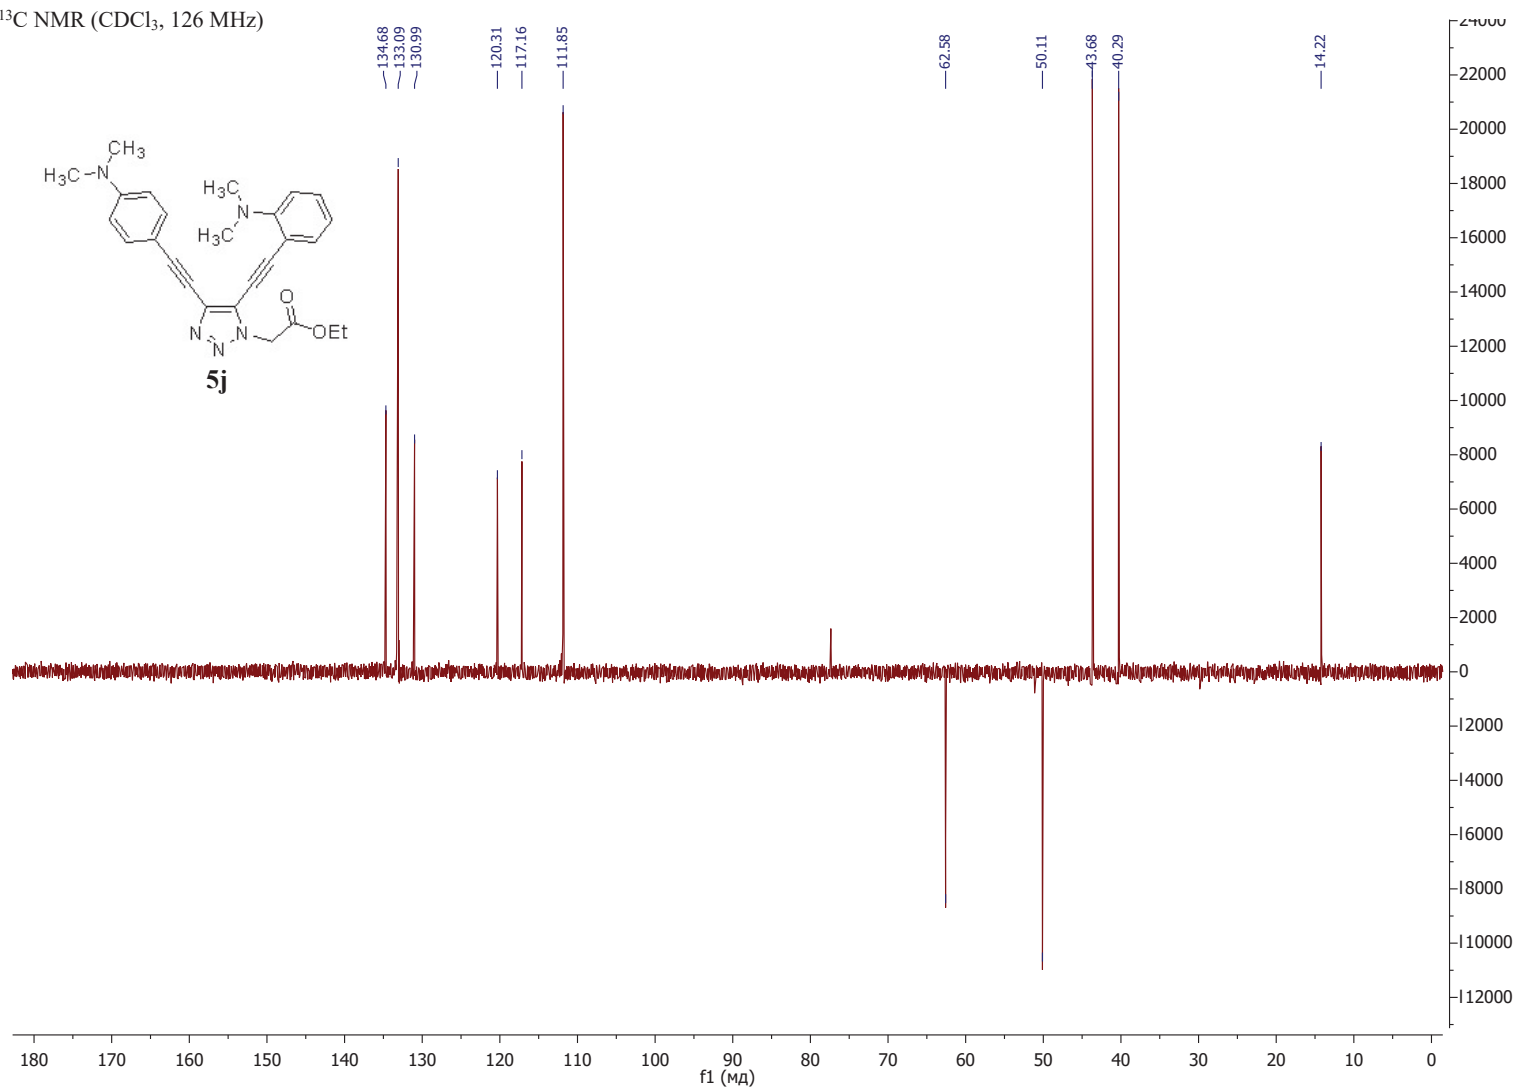

<sup>1</sup>H NMR (CDCl<sub>3</sub>, 400 MHz)

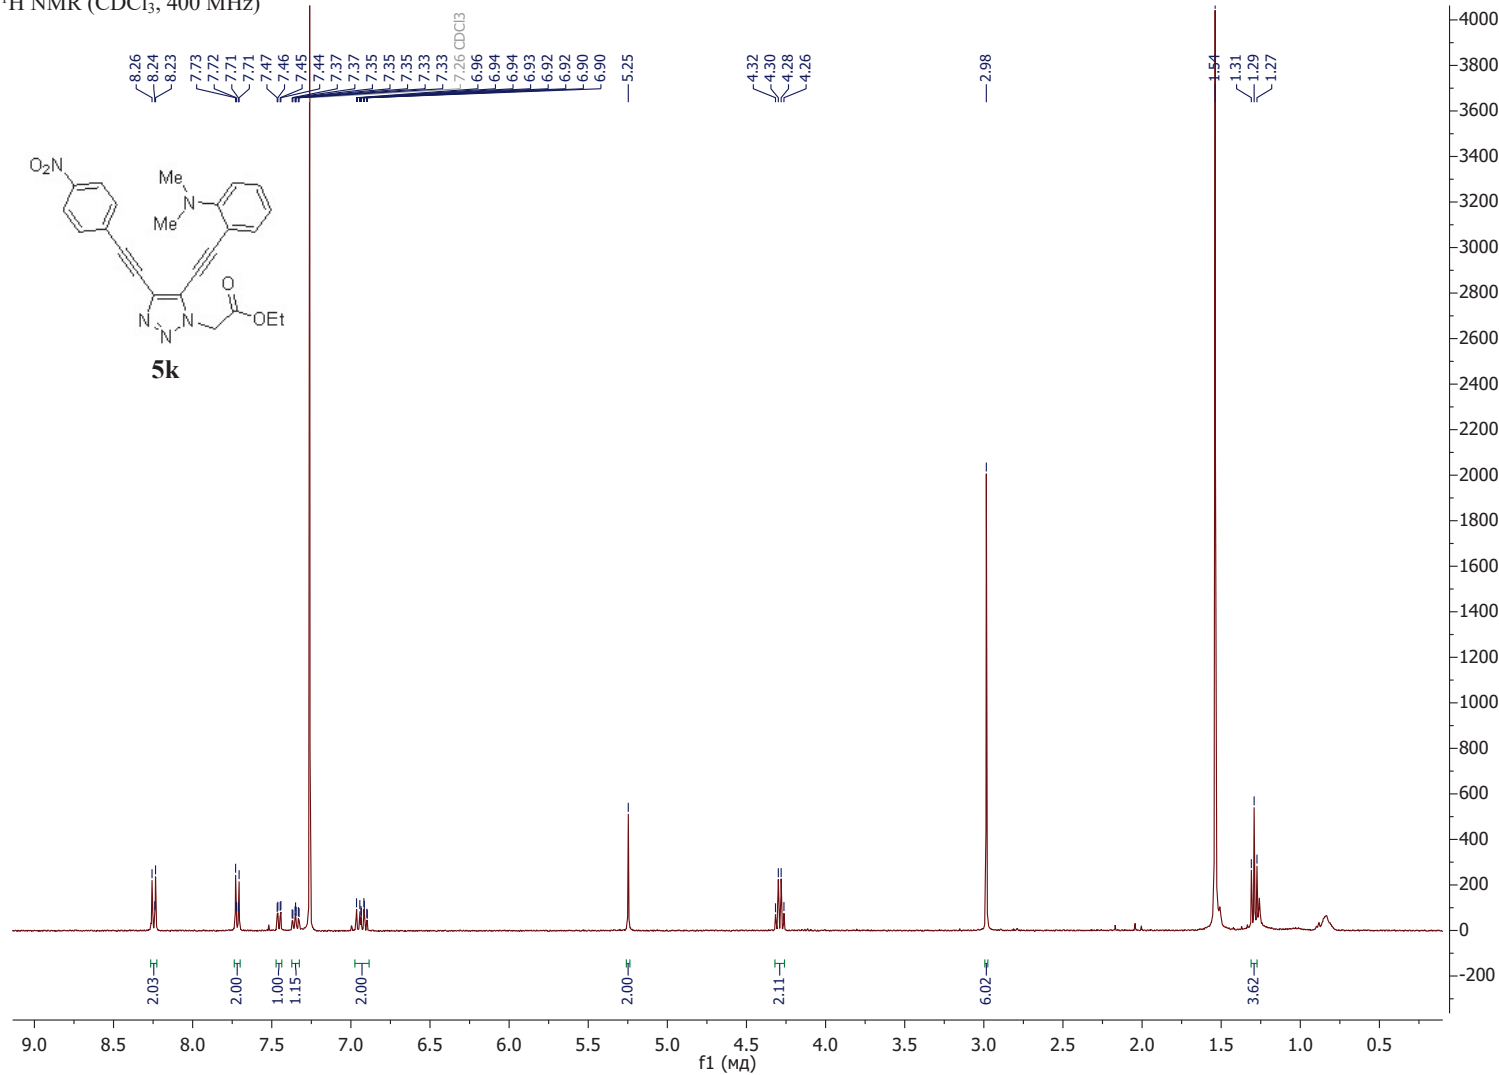

<sup>13</sup>C NMR (CDCl<sub>3</sub>, 101 MHz)

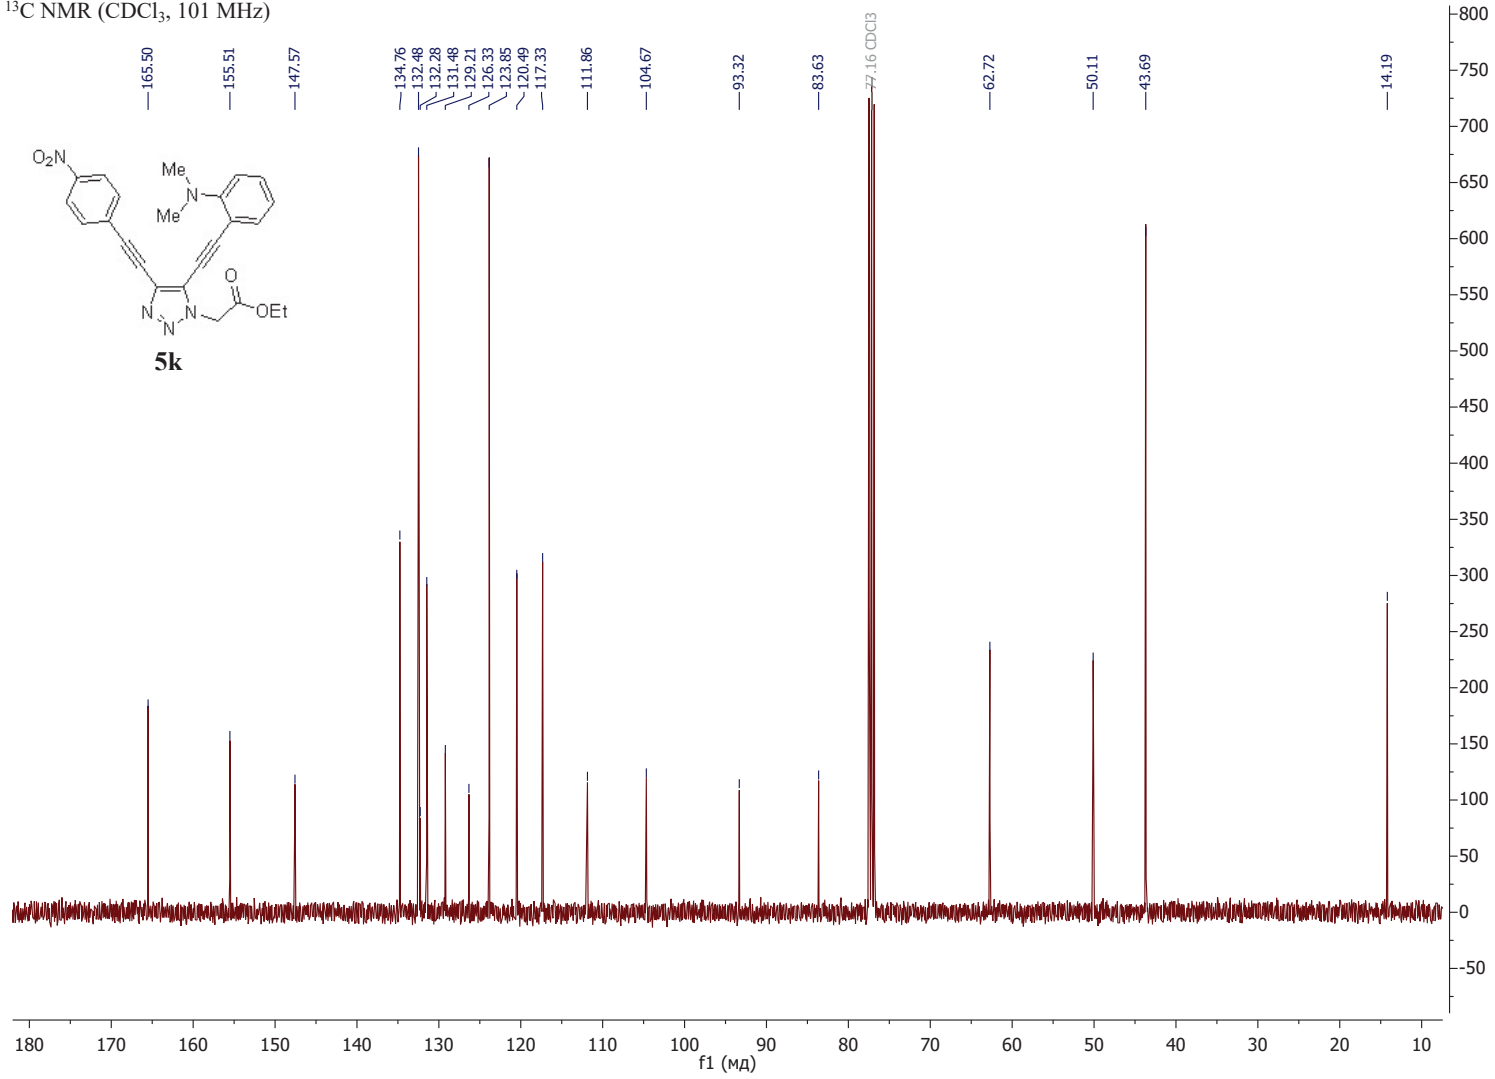

<sup>13</sup>C NMR (CDCl<sub>3</sub>, 101 MHz)

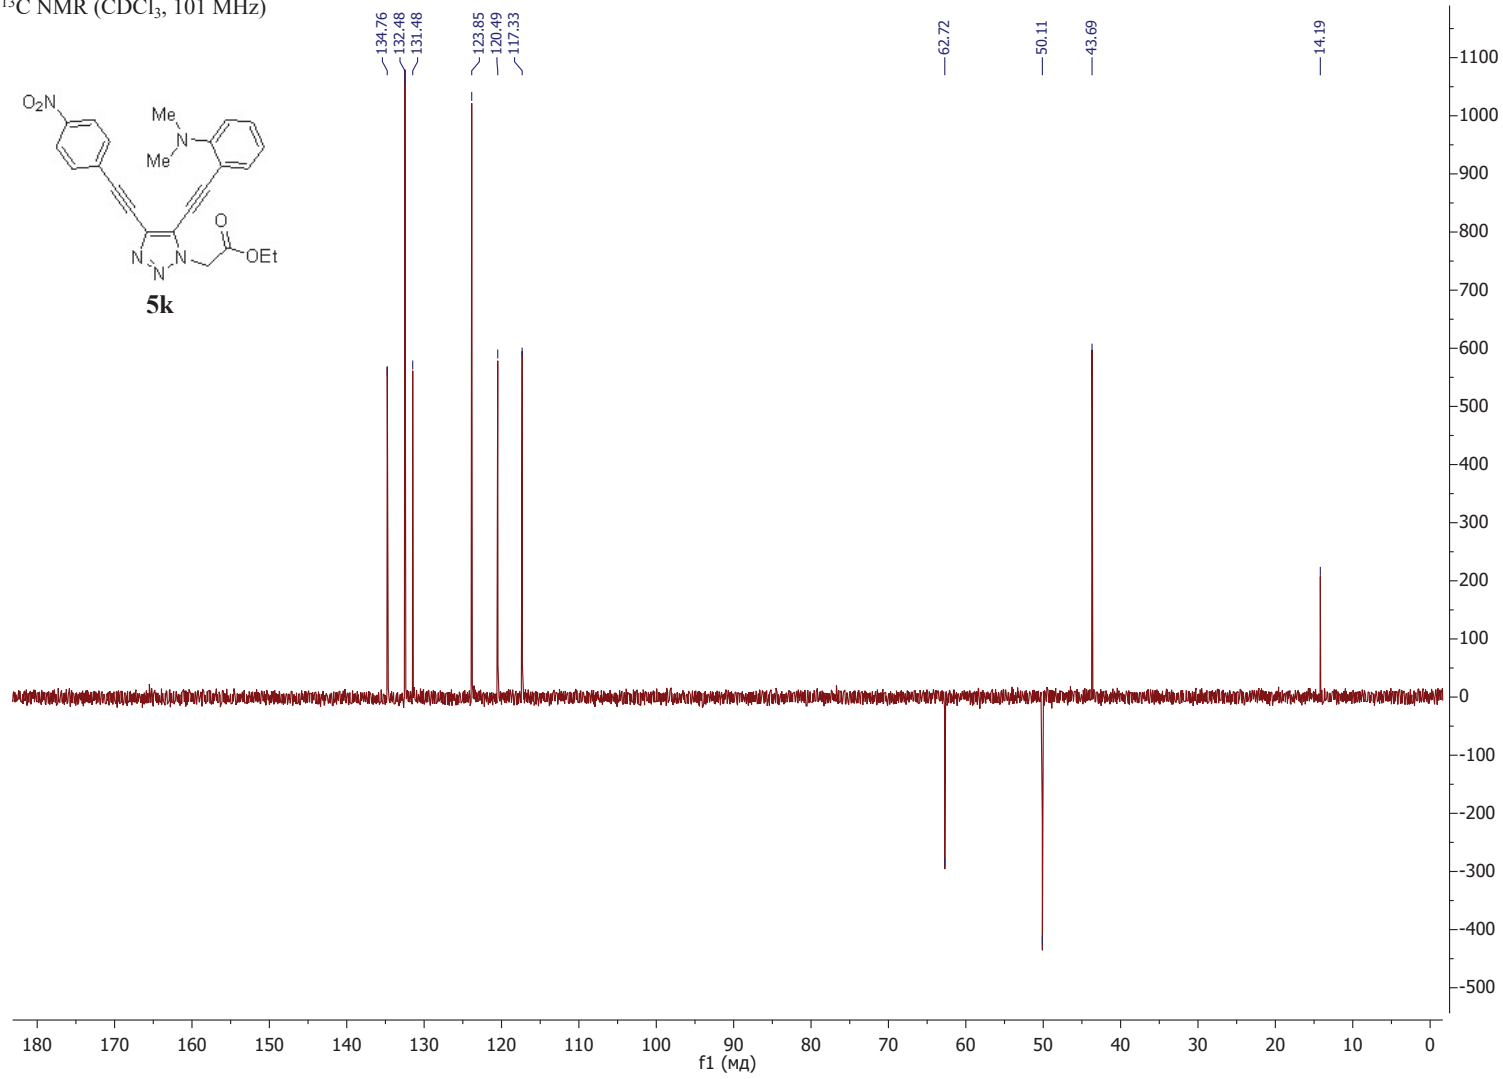

<sup>1</sup>H NMR (CDCl<sub>3</sub>, 400 MHz)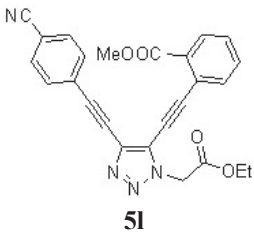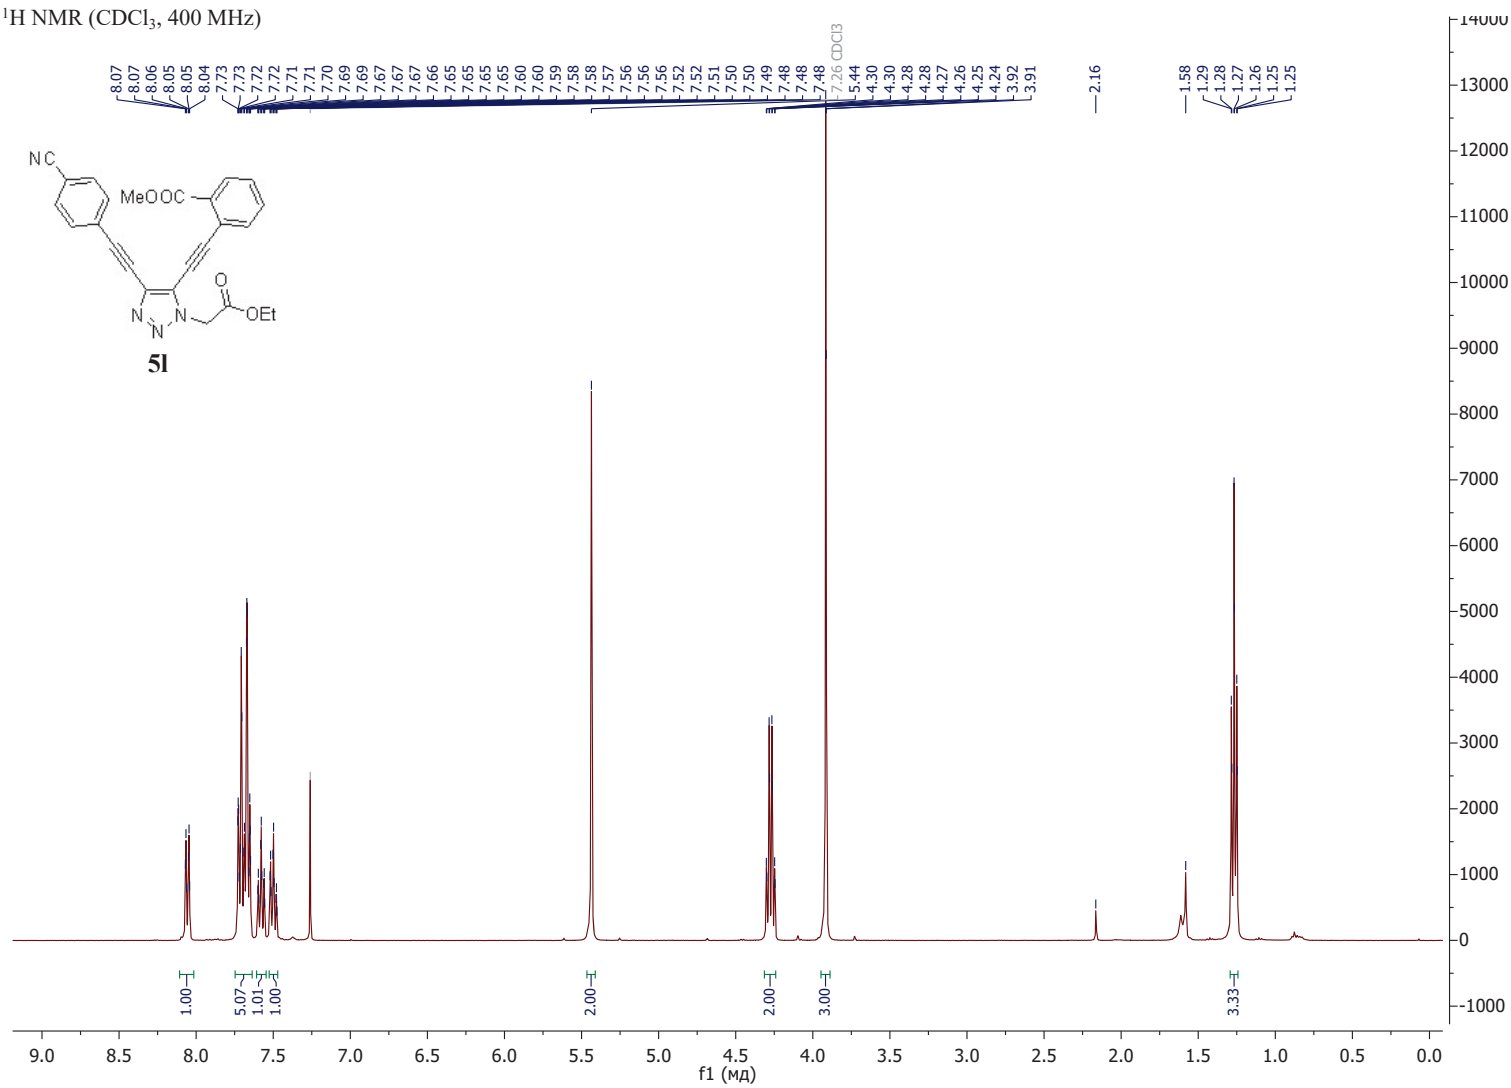

<sup>13</sup>C NMR (CDCl<sub>3</sub>, 101 MHz)

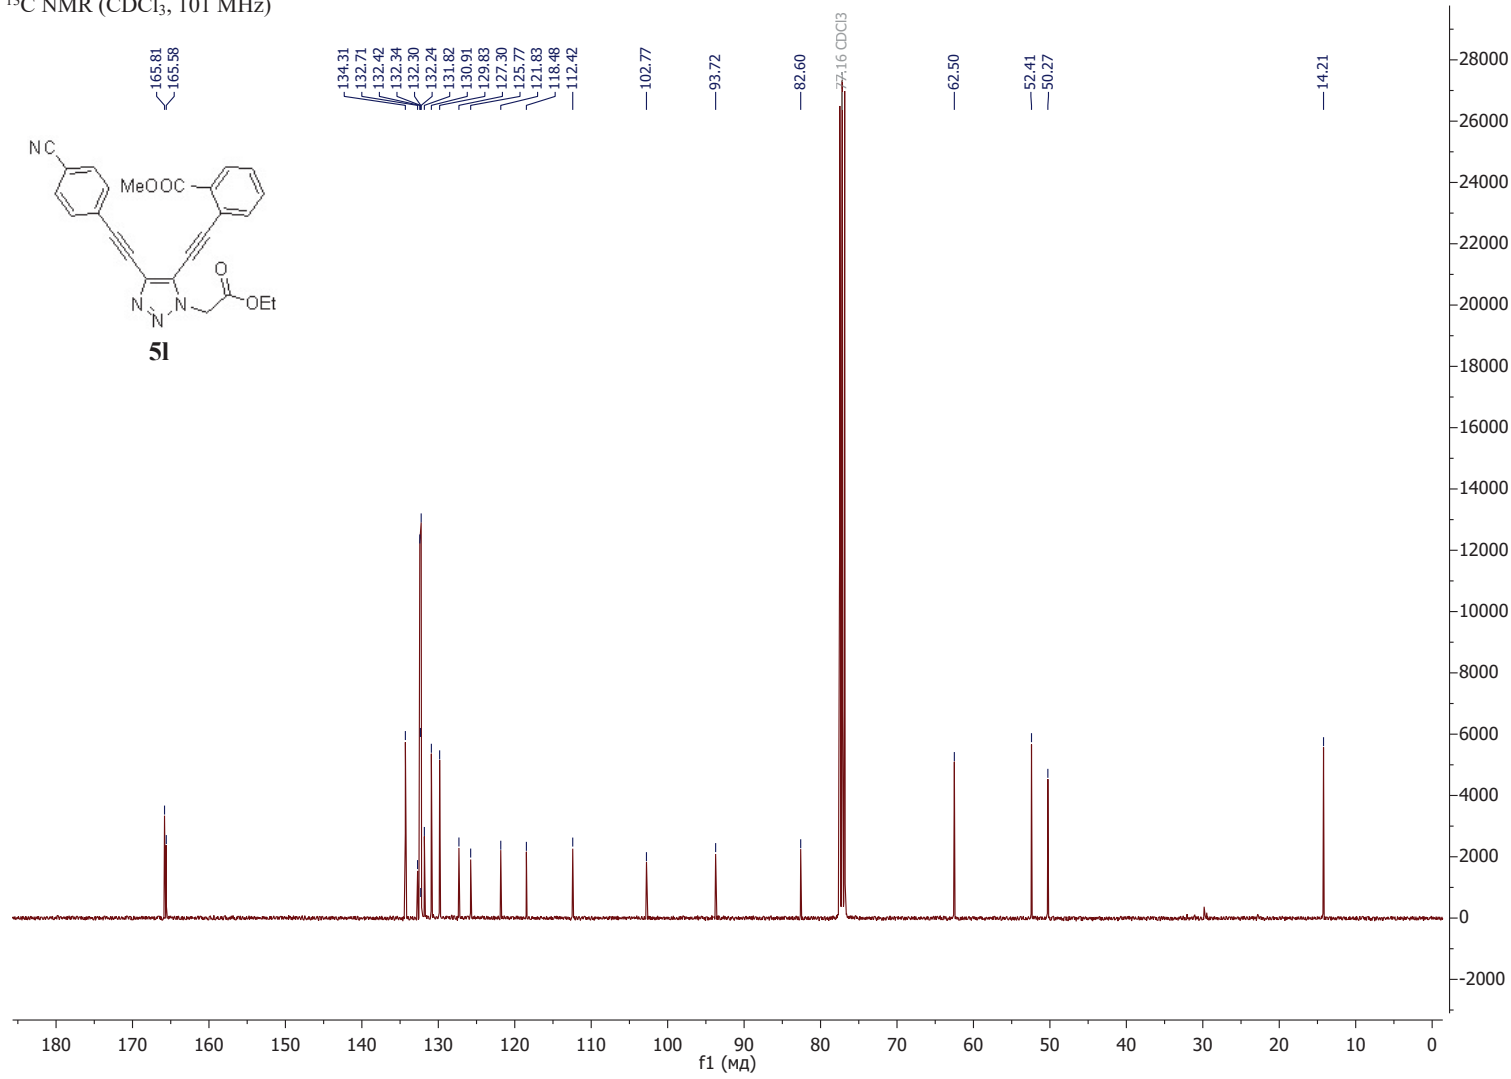

$^{13}\text{C}$  NMR ( $\text{CDCl}_3$ , 101 MHz)

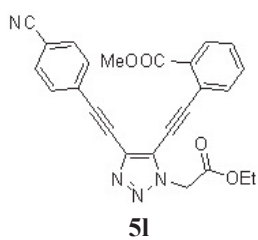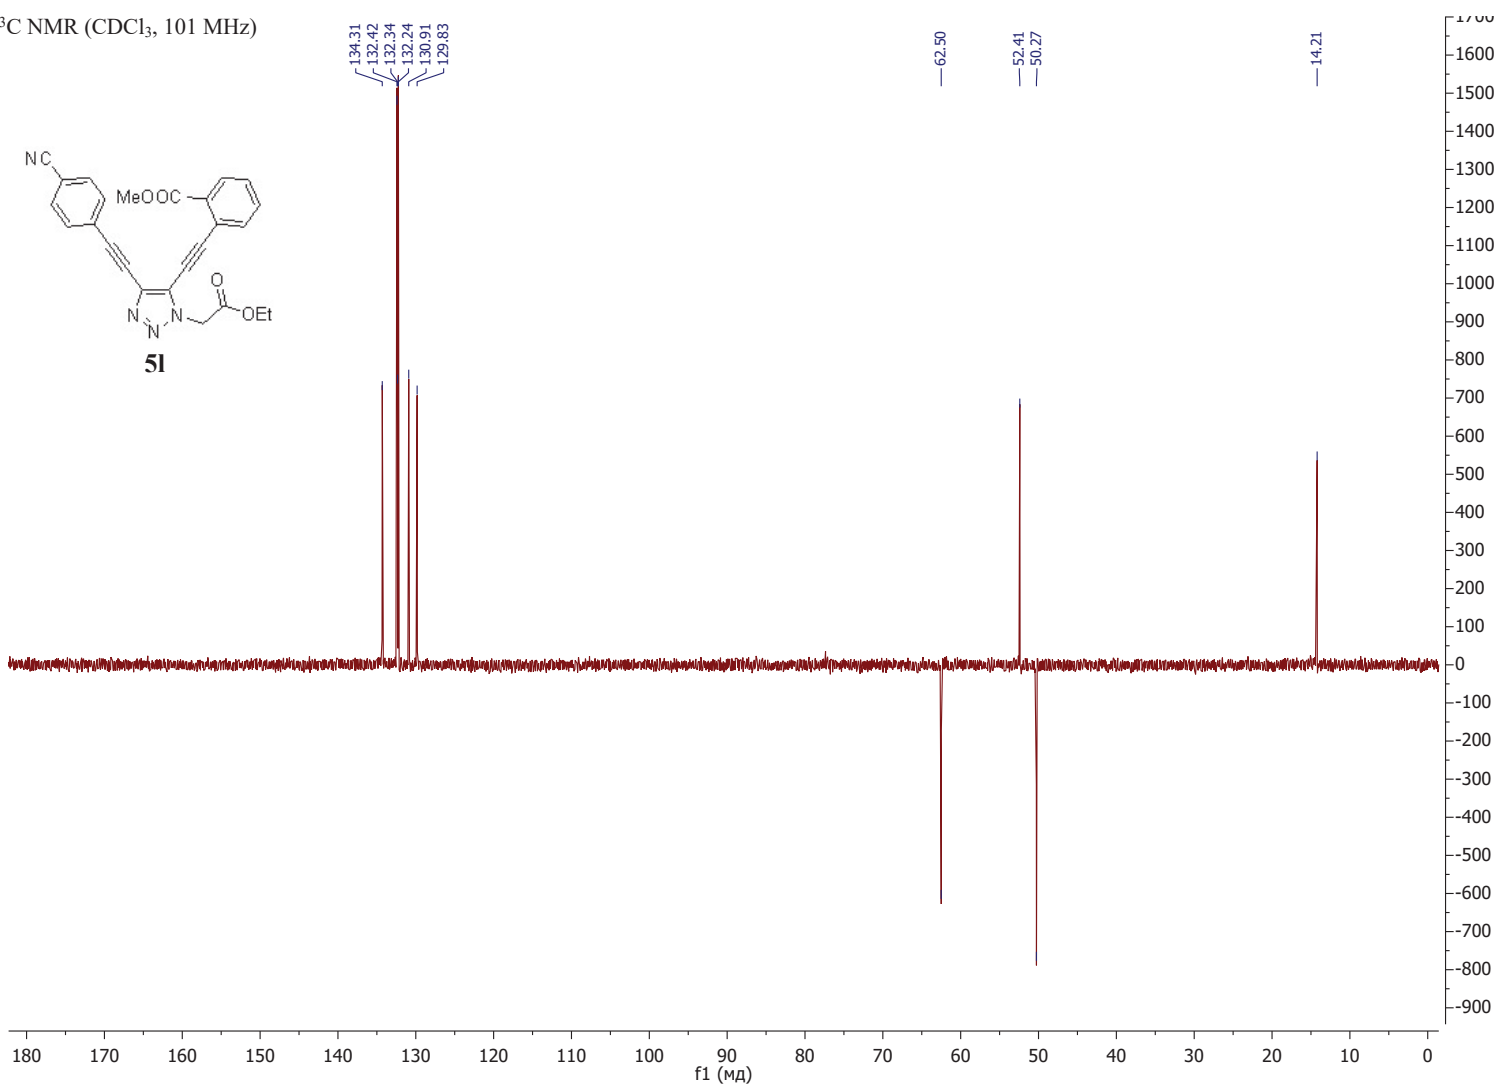



<sup>1</sup>H NMR (CDCl<sub>3</sub>, 400 MHz)

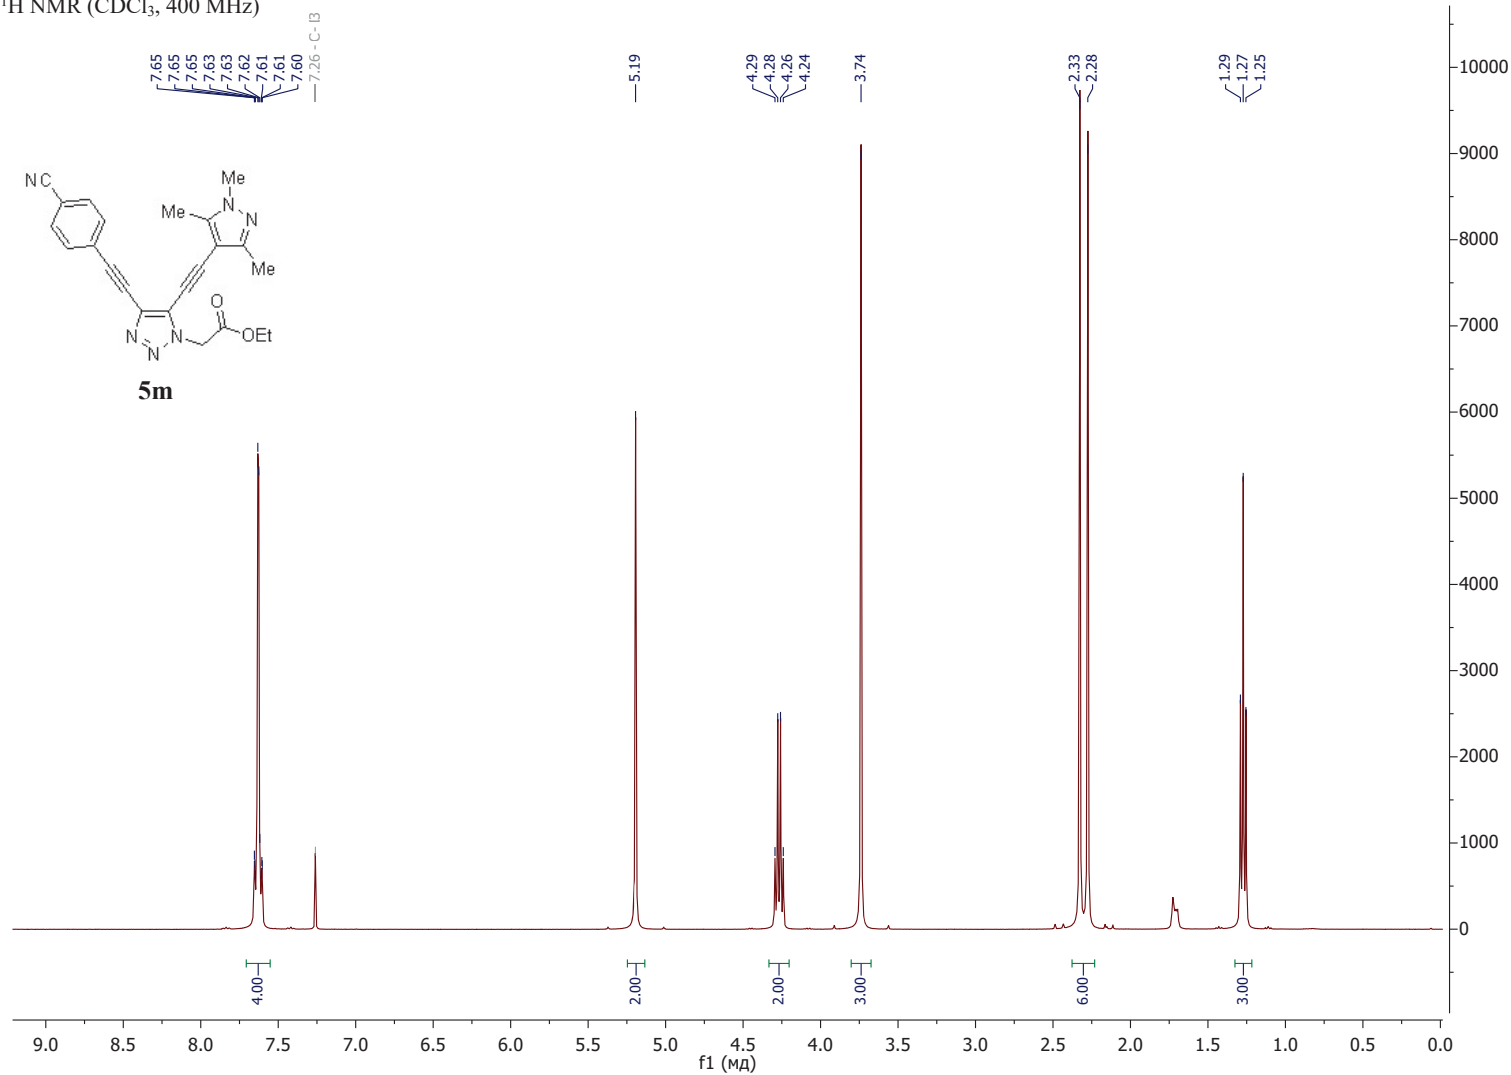

<sup>13</sup>C NMR (CDCl<sub>3</sub>, 101 MHz)

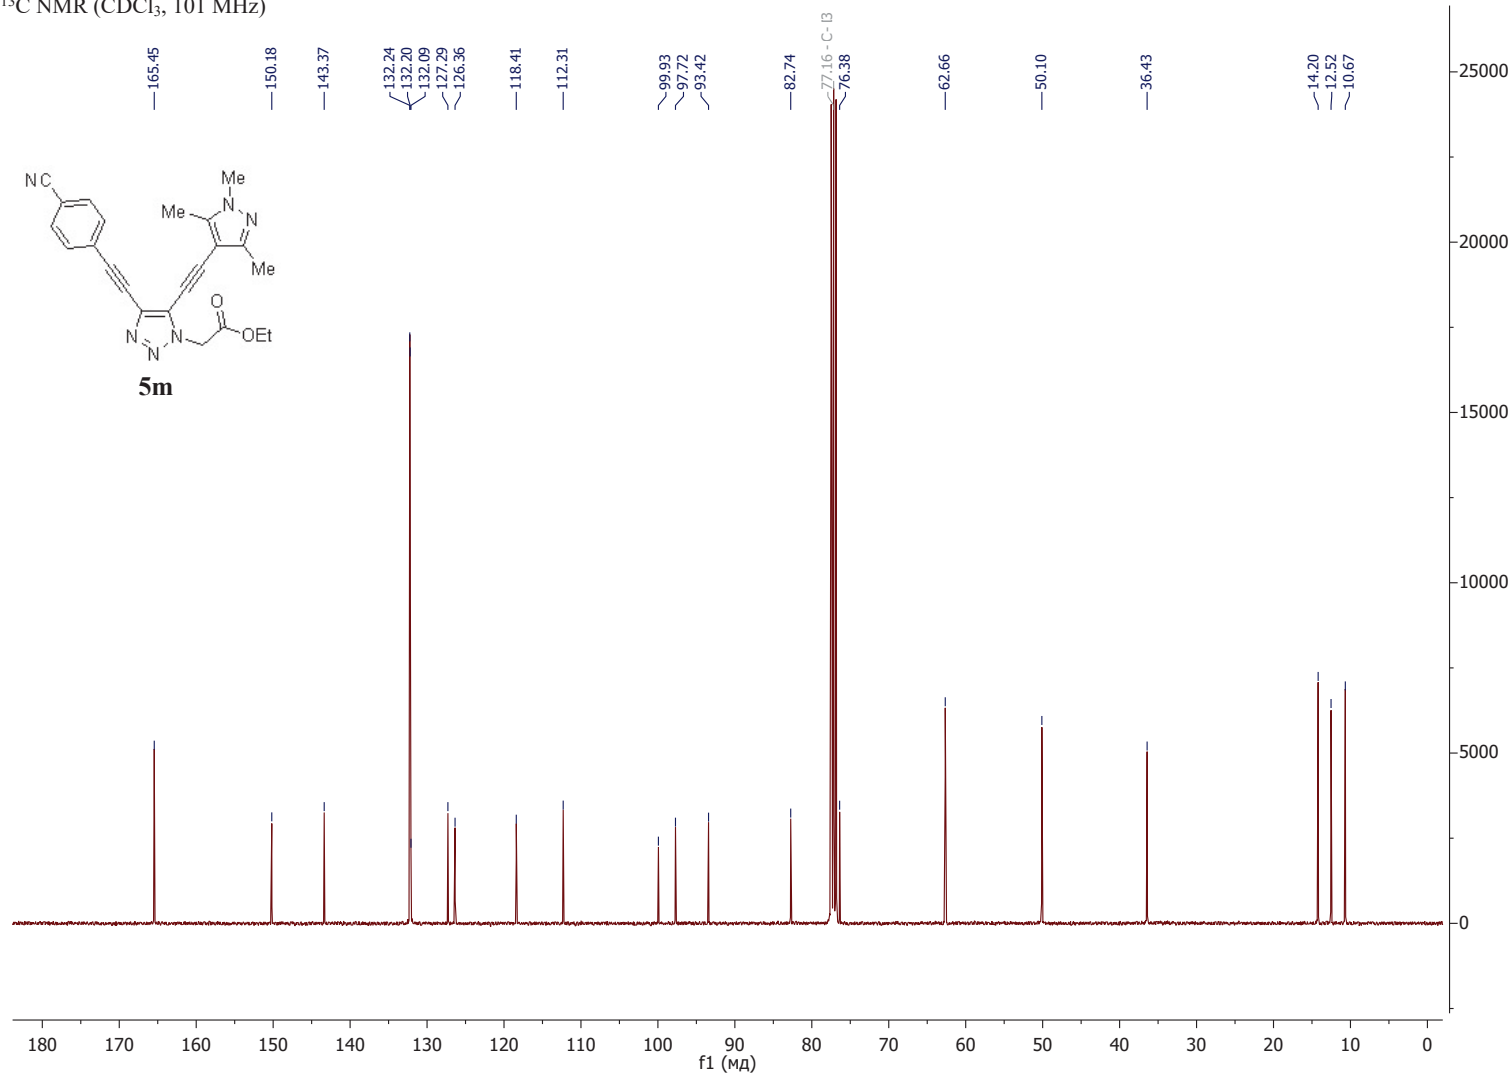

<sup>13</sup>C NMR (CDCl<sub>3</sub>, 101 MHz)

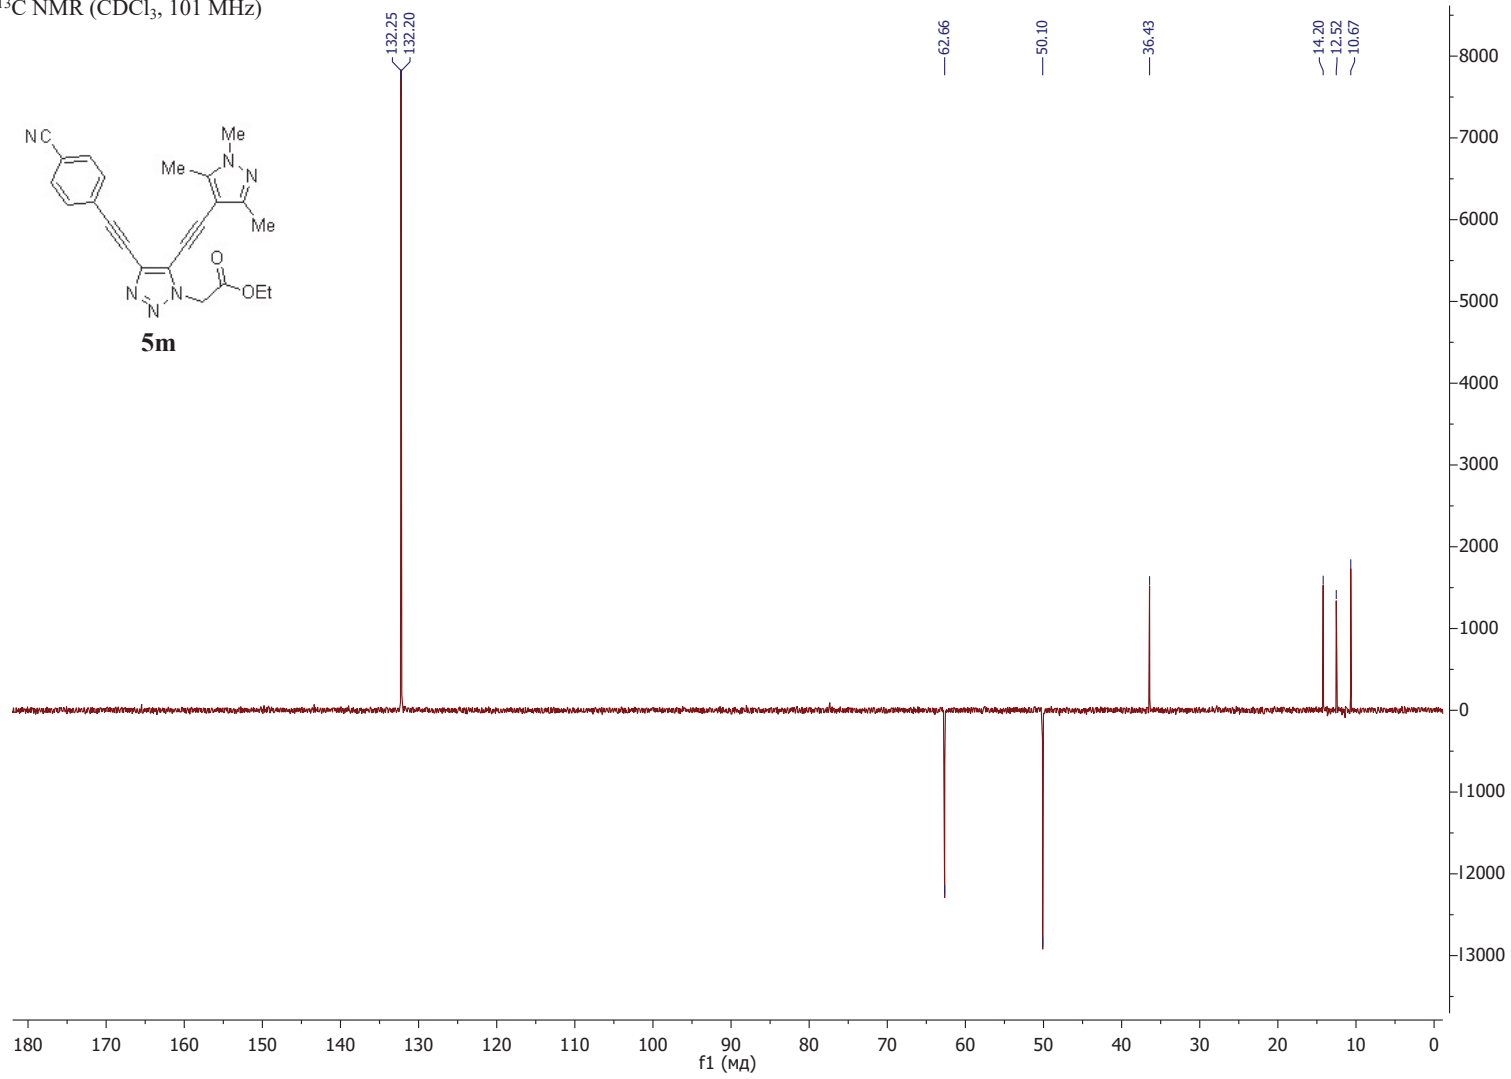

<sup>1</sup>H NMR (CDCl<sub>3</sub>, 400 MHz)

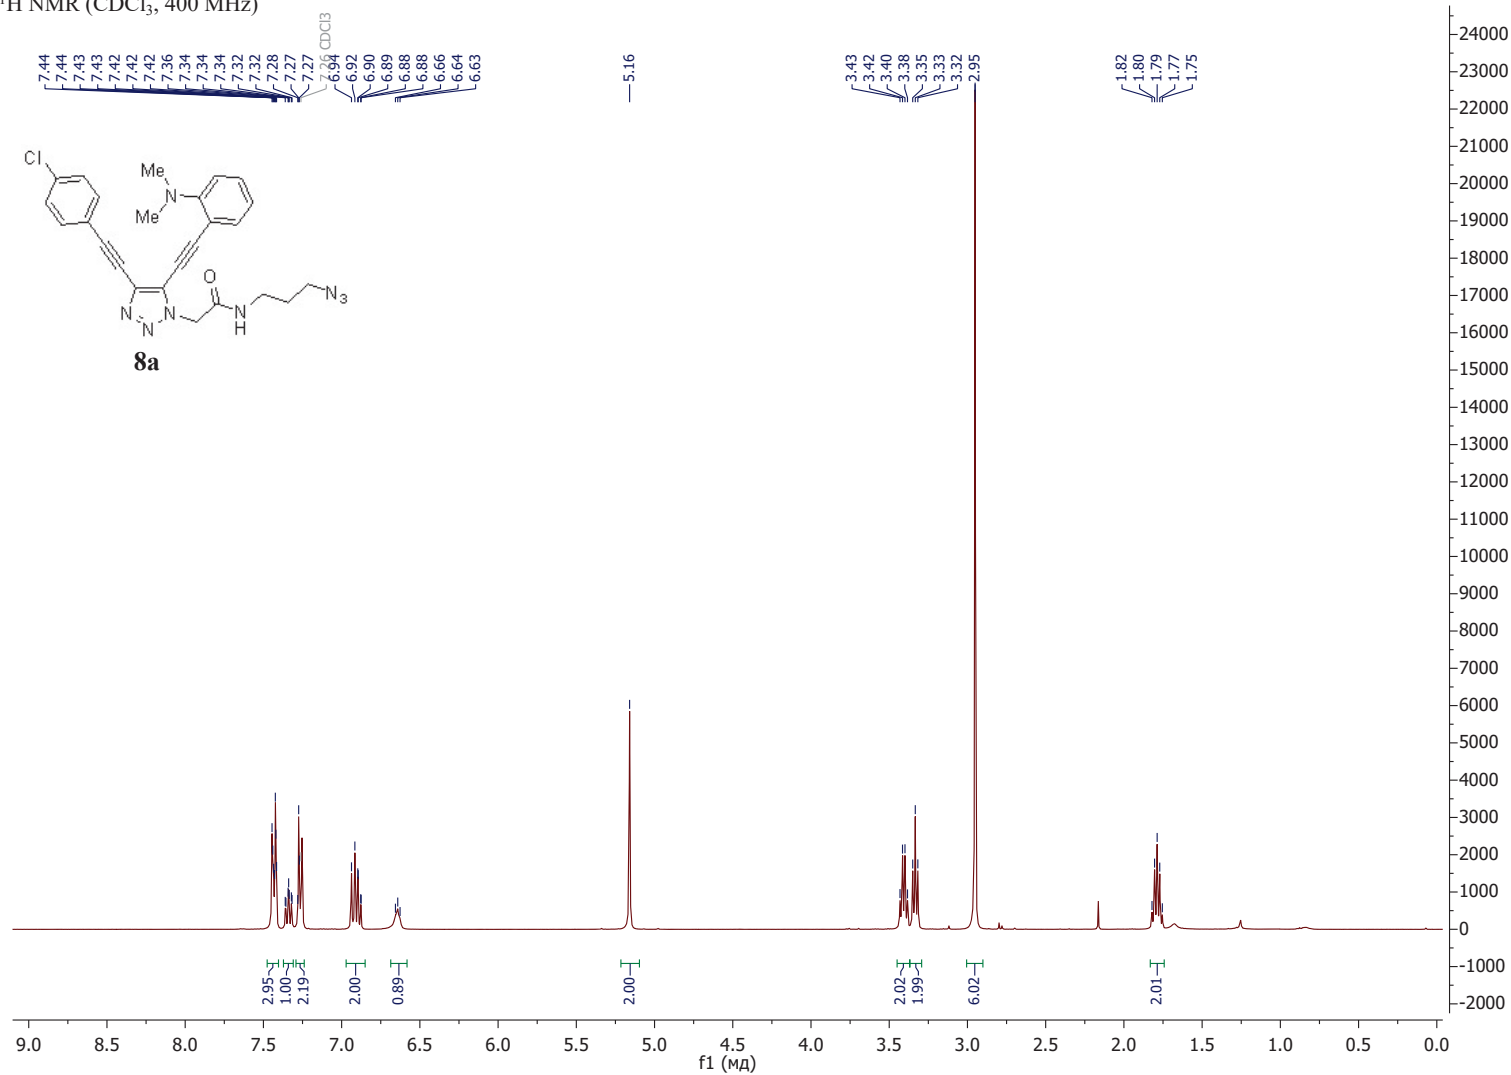

<sup>13</sup>C NMR (CDCl<sub>3</sub>, 101 MHz)

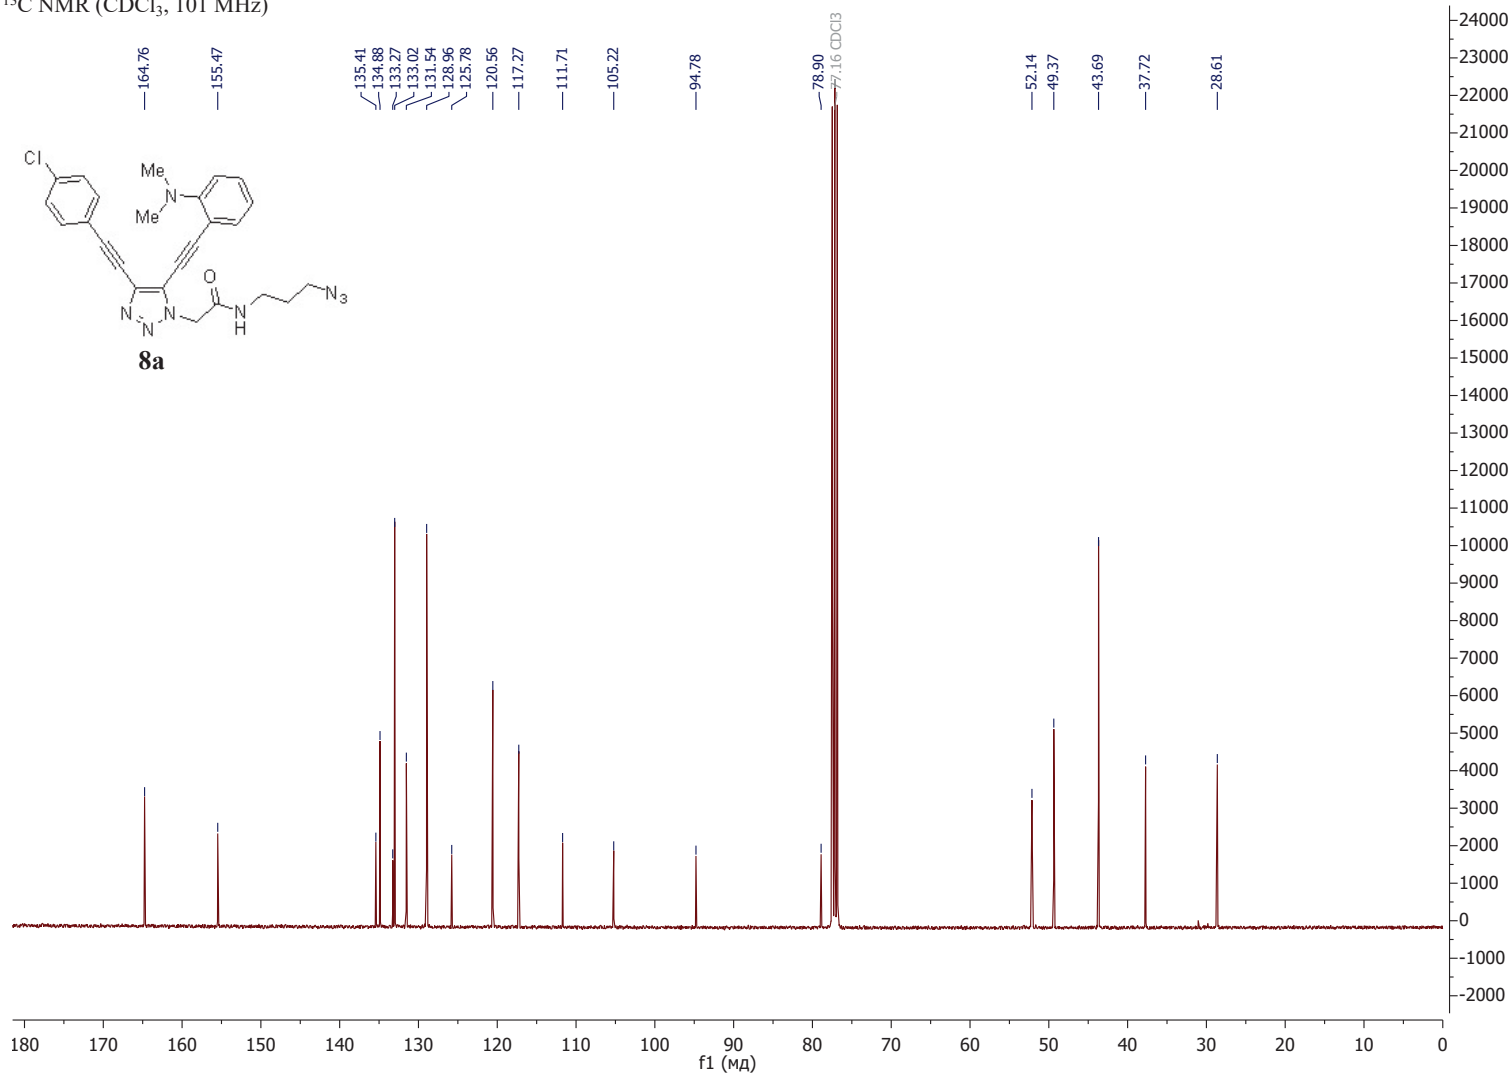

<sup>13</sup>C NMR (CDCl<sub>3</sub>, 101 MHz)

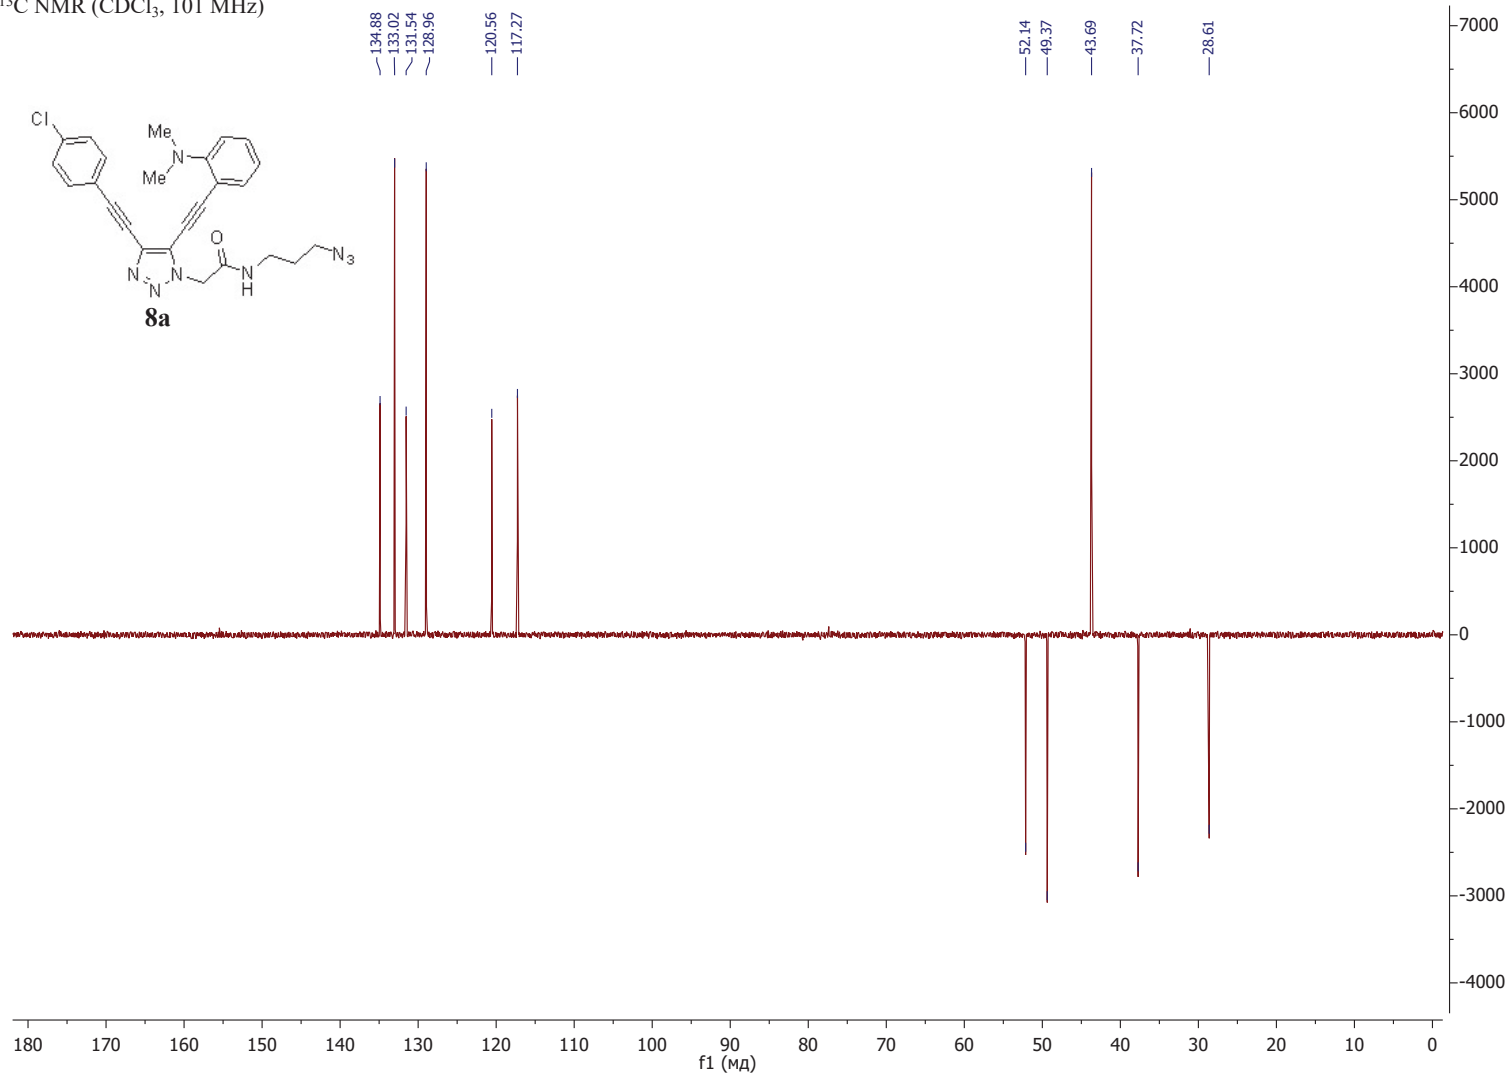

<sup>1</sup>H NMR (CDCl<sub>3</sub>, 400 MHz)

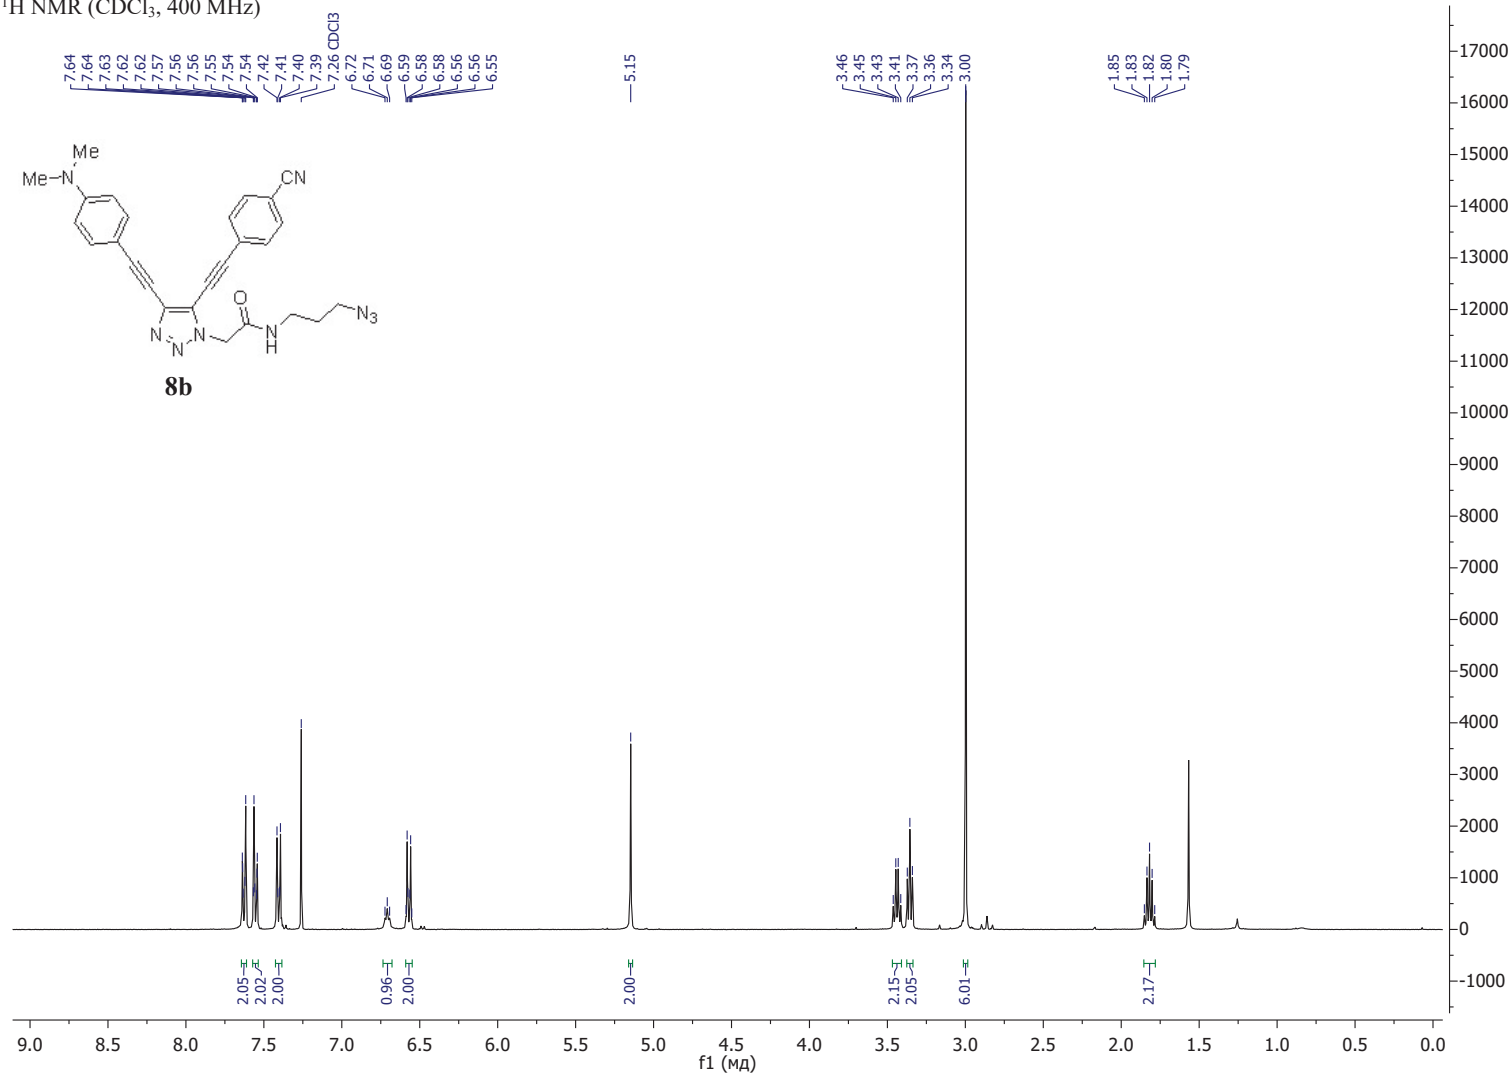

<sup>13</sup>C NMR (CDCl<sub>3</sub>, 101 MHz)

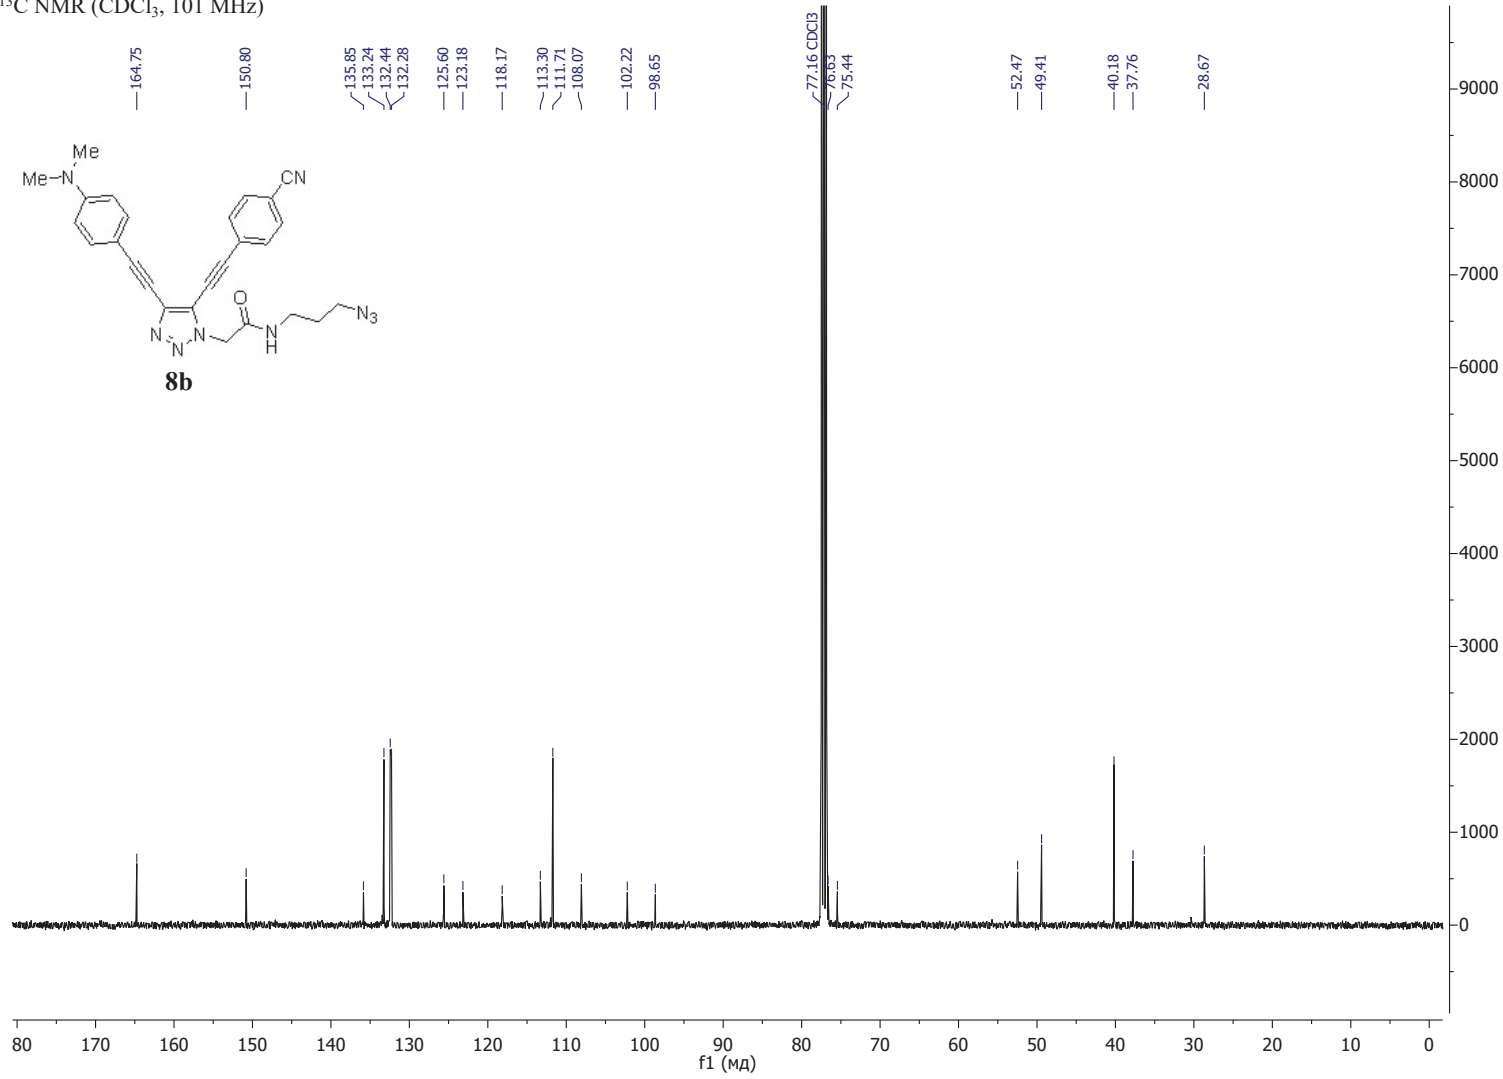



<sup>13</sup>C NMR (CDCl<sub>3</sub>, 101 MHz)

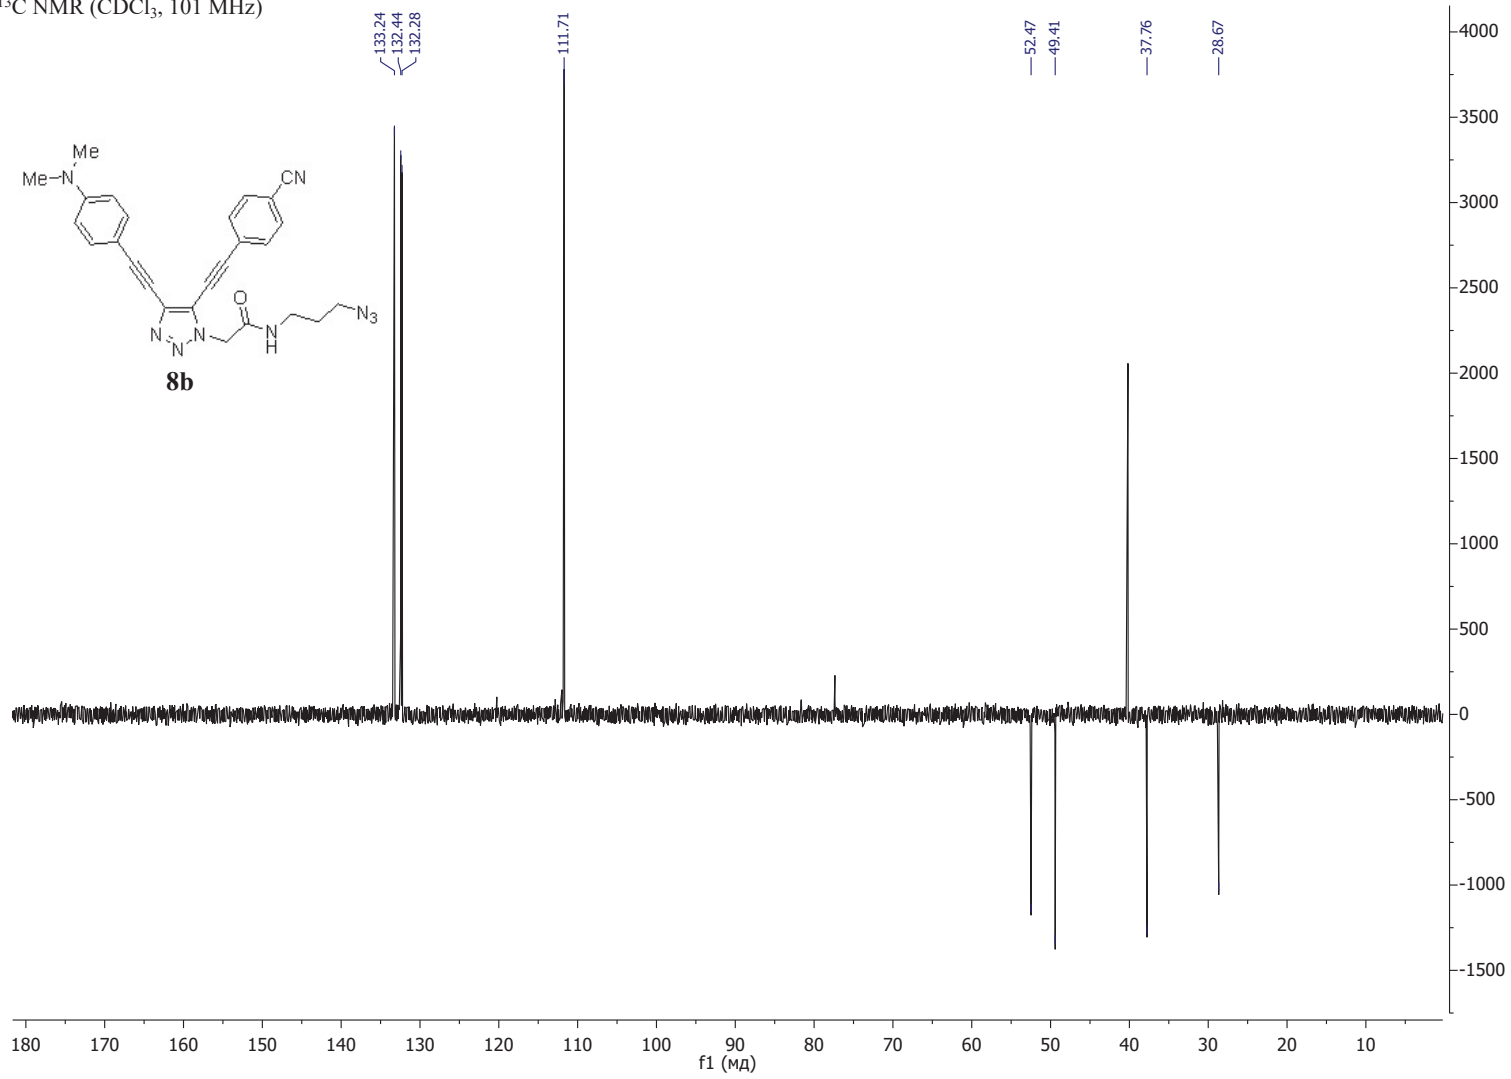

<sup>1</sup>H NMR (CDCl<sub>3</sub>, 400 MHz)

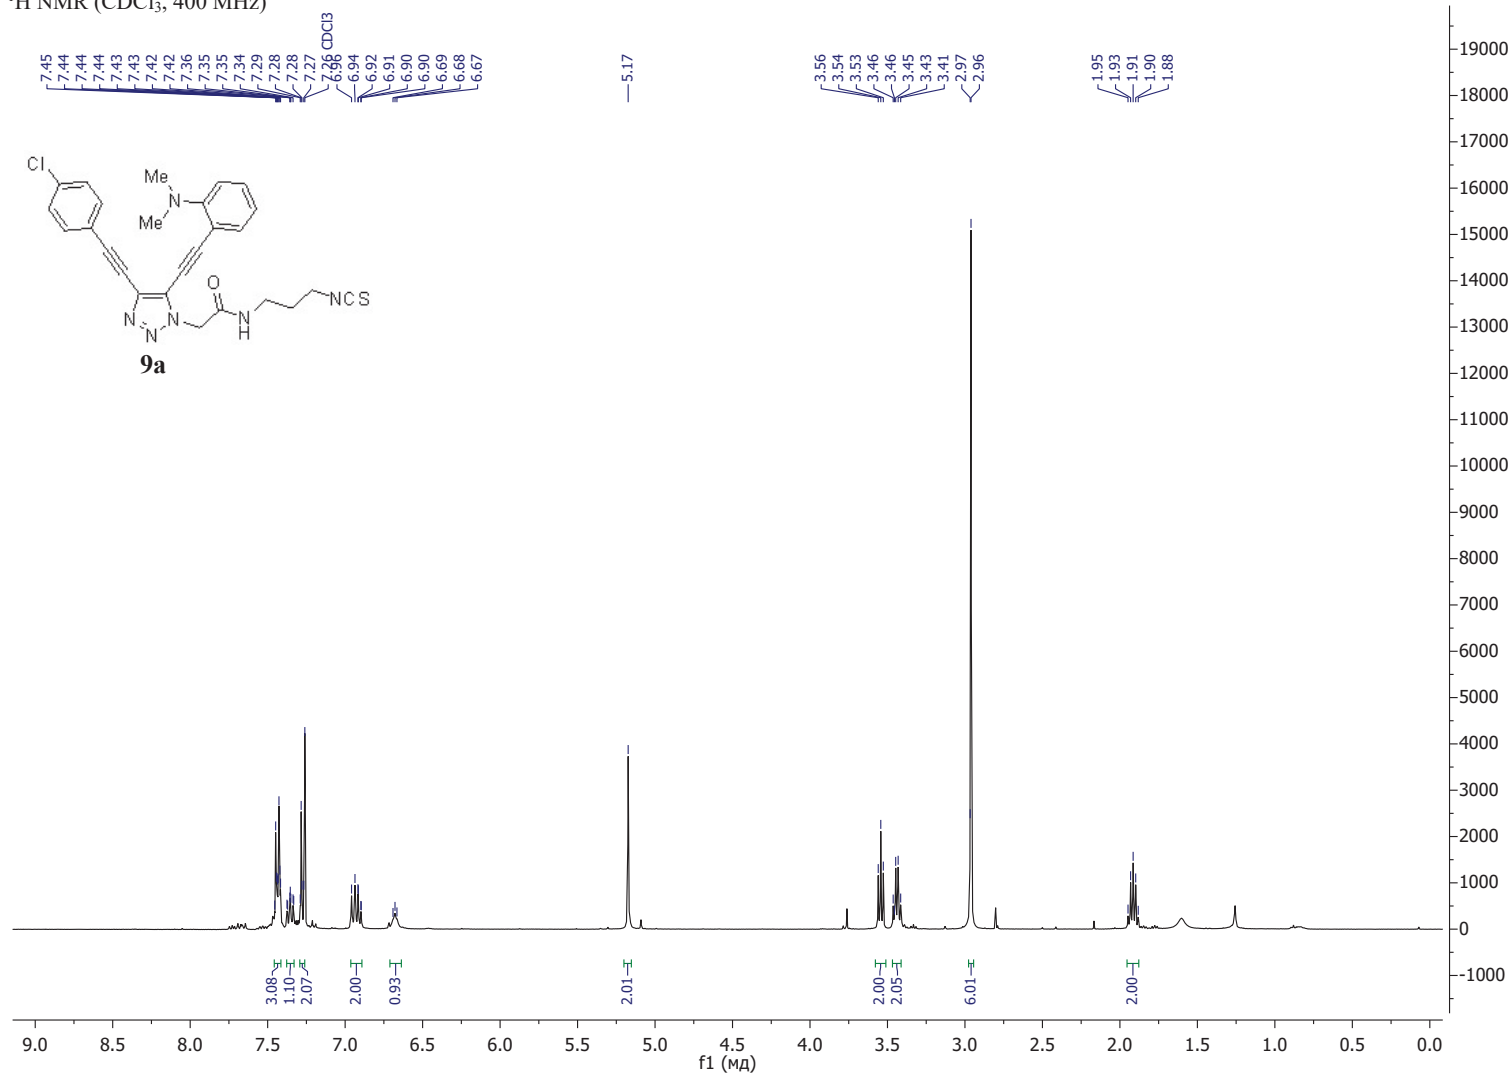

<sup>13</sup>C NMR (CDCl<sub>3</sub>, 101 MHz)

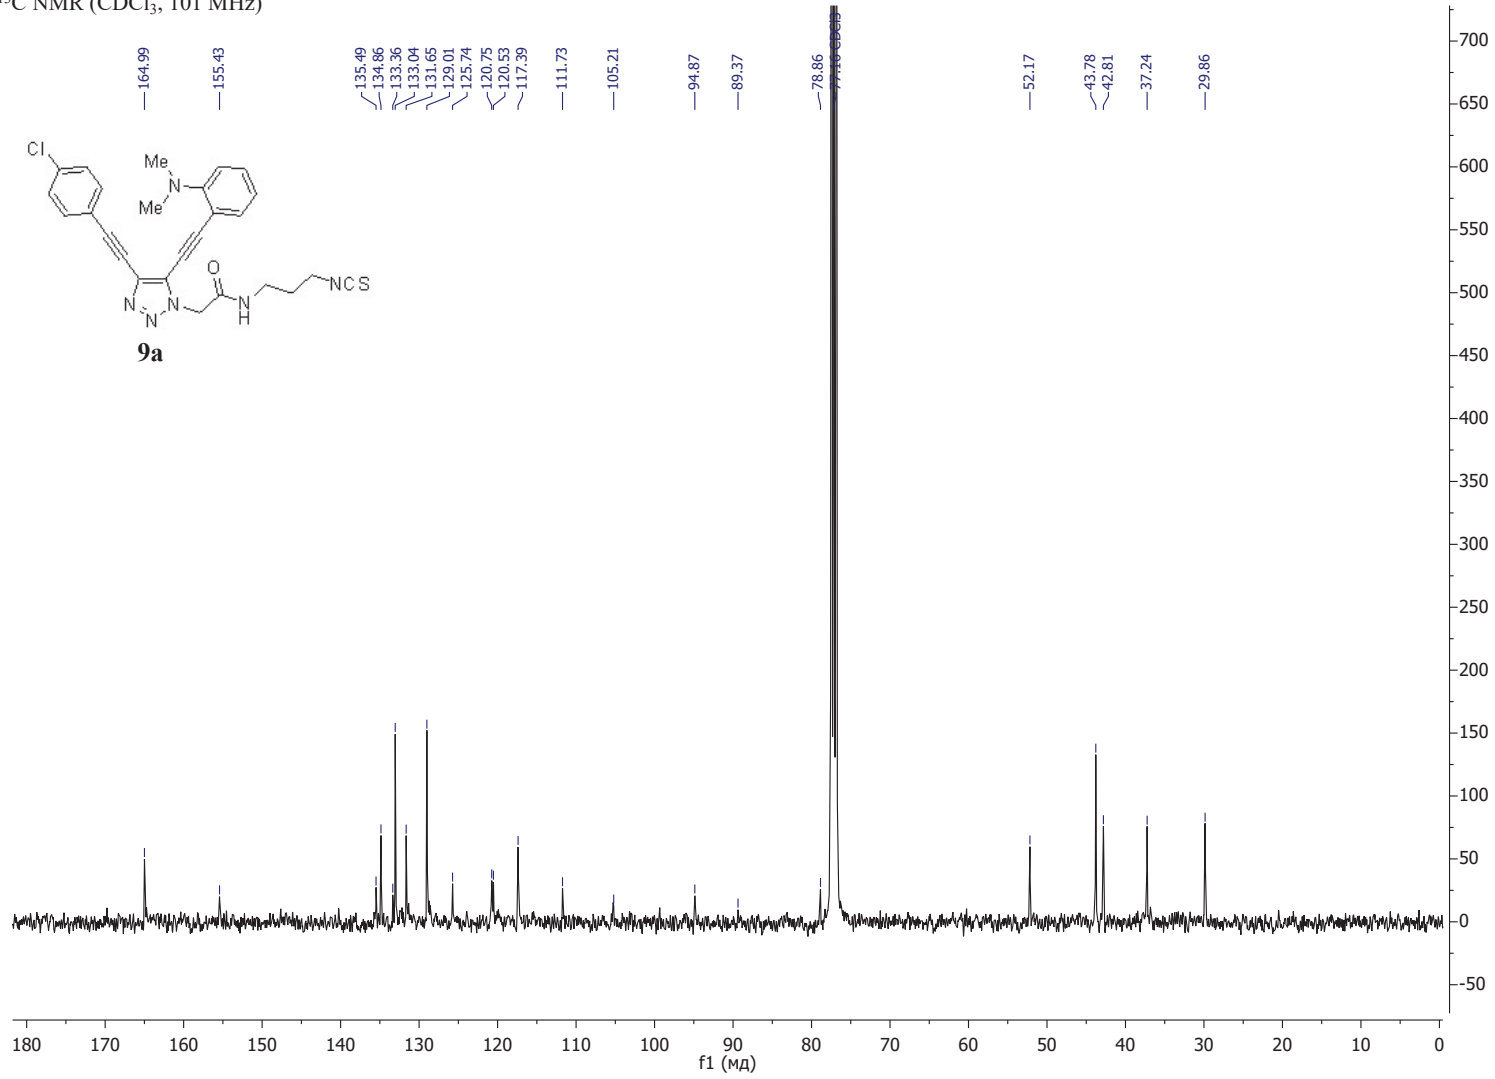

<sup>13</sup>C NMR (CDCl<sub>3</sub>, 101 MHz)

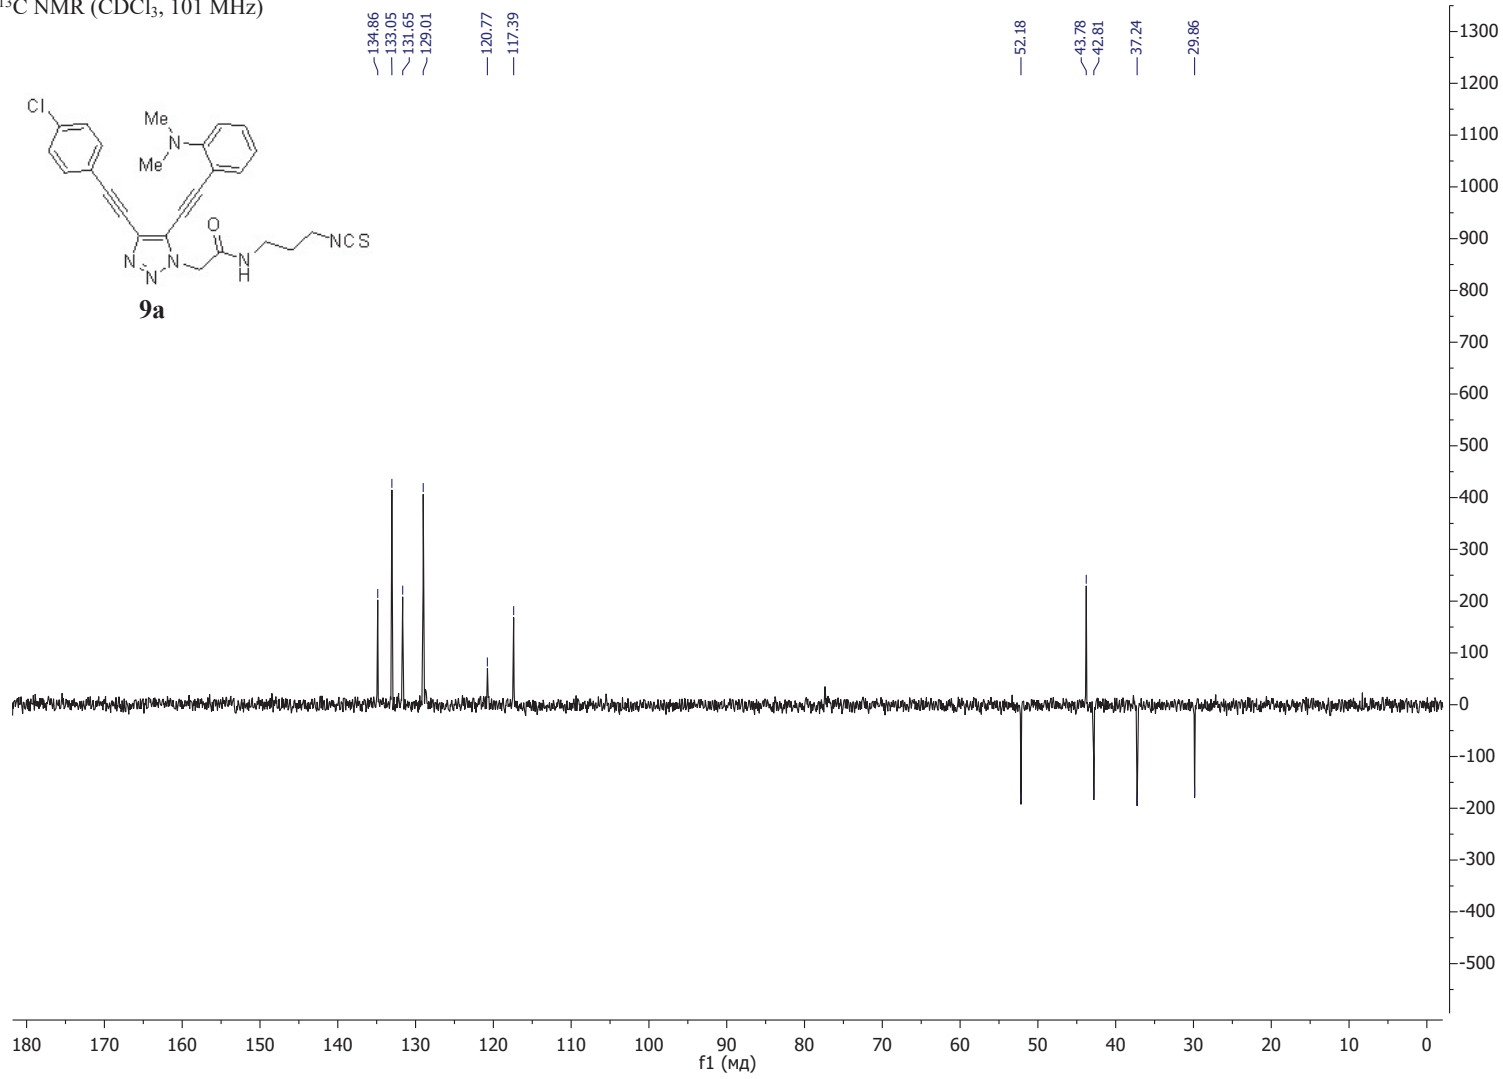

3a

---

## Mass Spectrum Report

---

**Analysis Info**

Analysis Name D:\Data\2018\november\20\TOK62.d  
Method tune\_low.m  
Sample Name TOK62  
Comment MeOH

Acquisition Date 20.11.2018 13:13:01

Operator  
Instrument / Ser# Bruker Customer  
microTOF 10223

**Acquisition Parameter**

|             |            |                      |          |                  |           |
|-------------|------------|----------------------|----------|------------------|-----------|
| Source Type | ESI        | Ion Polarity         | Positive | Set Nebulizer    | 0.4 Bar   |
| Focus       | Not active |                      |          | Set Dry Heater   | 180 °C    |
| Scan Begin  | 50 m/z     | Set Capillary        | 4500 V   | Set Dry Gas      | 4.0 l/min |
| Scan End    | 2000 m/z   | Set End Plate Offset | -500 V   | Set Divert Valve | Source    |

---

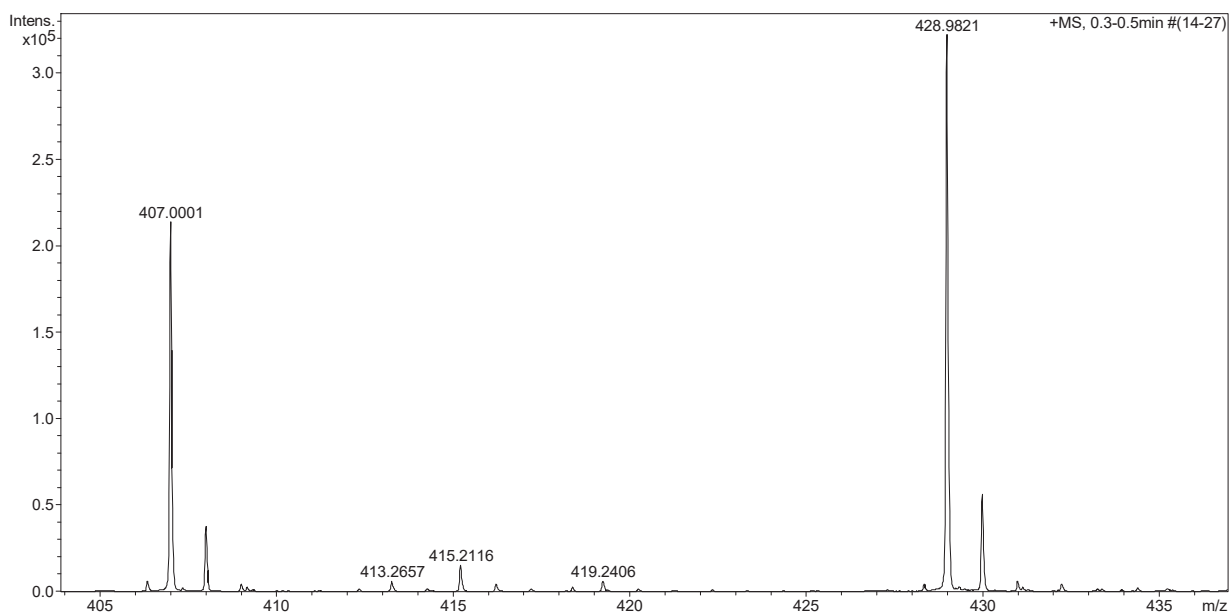

3b

## Display Report

### Analysis Info

Analysis Name D:\Data\Work\2018\October\23\TOK\_48\_000001.d  
Method tune\_wide\_pos.m  
Sample Name TOK\_48\_  
Comment

Acquisition Date 23-Oct-18 14:08:54  
Operator BDAL@DE  
Instrument maXis 62

### Acquisition Parameter

|             |          |                       |            |                  |           |
|-------------|----------|-----------------------|------------|------------------|-----------|
| Source Type | ESI      | Ion Polarity          | Positive   | Set Nebulizer    | 0.4 Bar   |
| Focus       | Active   | Set Capillary         | 4500 V     | Set Dry Heater   | 180 °C    |
| Scan Begin  | 300 m/z  | Set End Plate Offset  | -500 V     | Set Dry Gas      | 4.0 l/min |
| Scan End    | 3000 m/z | Set Collision Cell RF | 1000.0 Vpp | Set Divert Valve | Source    |

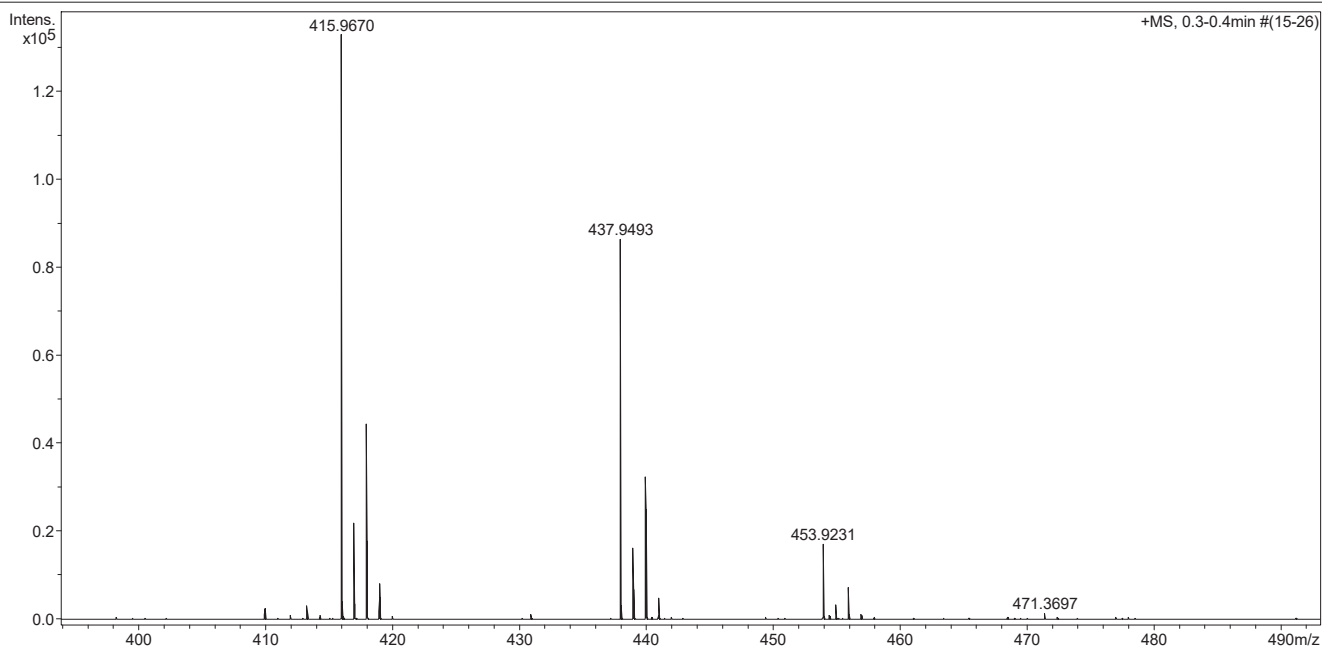

Mass Spectrum Report

|                              |  |                                  |  |                      |  |                     |  |                  |  |           |  |
|------------------------------|--|----------------------------------|--|----------------------|--|---------------------|--|------------------|--|-----------|--|
| <b>Analysis Info</b>         |  |                                  |  | Acquisition Date     |  | 13.11.2018 10:18:33 |  |                  |  |           |  |
| Analysis Name                |  | D:\Data\2018\november\13\TOK58.d |  |                      |  | Operator            |  | Bruker Customer  |  |           |  |
| Method                       |  | tune_low.m                       |  |                      |  | Instrument / Ser#   |  | micrOTOF 10223   |  |           |  |
| Sample Name                  |  | TOK58                            |  |                      |  |                     |  |                  |  |           |  |
| Comment                      |  | MeOH                             |  |                      |  |                     |  |                  |  |           |  |
| <b>Acquisition Parameter</b> |  |                                  |  |                      |  |                     |  |                  |  |           |  |
| Source Type                  |  | ESI                              |  | Ion Polarity         |  | Positive            |  | Set Nebulizer    |  | 0.4 Bar   |  |
| Focus                        |  | Not active                       |  |                      |  |                     |  | Set Dry Heater   |  | 180 °C    |  |
| Scan Begin                   |  | 50 m/z                           |  | Set Capillary        |  | 4500 V              |  | Set Dry Gas      |  | 4.0 l/min |  |
| Scan End                     |  | 3000 m/z                         |  | Set End Plate Offset |  | -500 V              |  | Set Divert Valve |  | Source    |  |

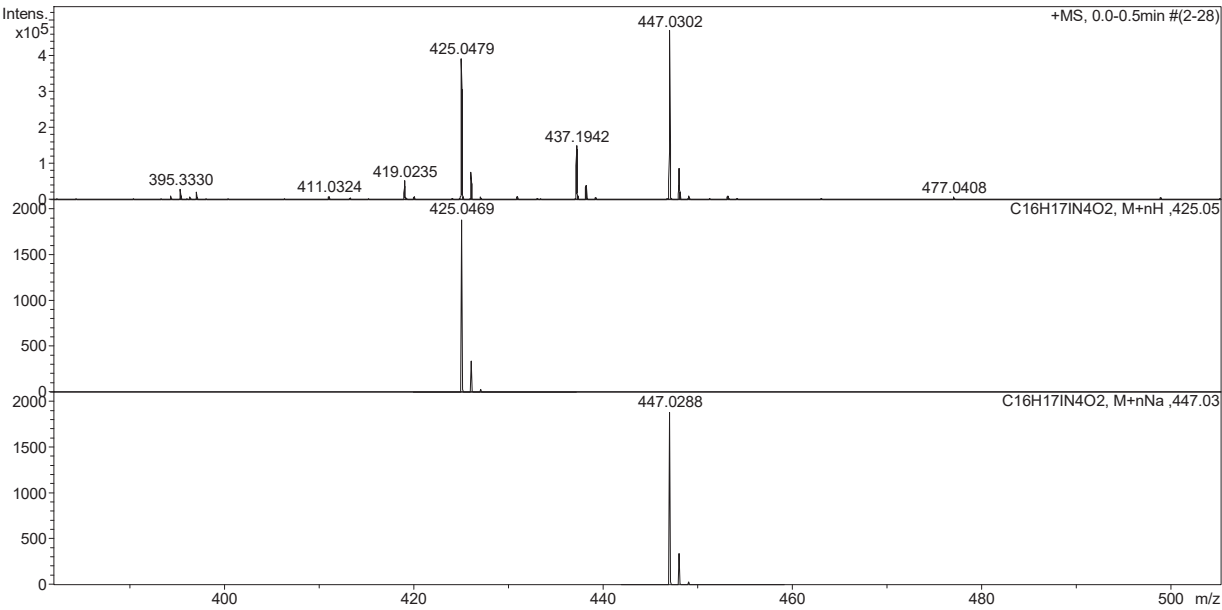

3d

## Mass Spectrum Report

**Analysis Info**

Analysis Name D:\Data\2018\October\05\TOK38.d  
Method tune\_low.m  
Sample Name TOK38  
Comment MeOH

Acquisition Date 05.10.2018 9:49:27

Operator  
Instrument / Ser# Bruker Customer  
microTOF 10223

**Acquisition Parameter**

|             |            |                      |          |                  |           |
|-------------|------------|----------------------|----------|------------------|-----------|
| Source Type | ESI        | Ion Polarity         | Positive | Set Nebulizer    | 0.4 Bar   |
| Focus       | Not active |                      |          | Set Dry Heater   | 180 °C    |
| Scan Begin  | 50 m/z     | Set Capillary        | 4500 V   | Set Dry Gas      | 4.0 l/min |
| Scan End    | 3000 m/z   | Set End Plate Offset | -500 V   | Set Divert Valve | Source    |

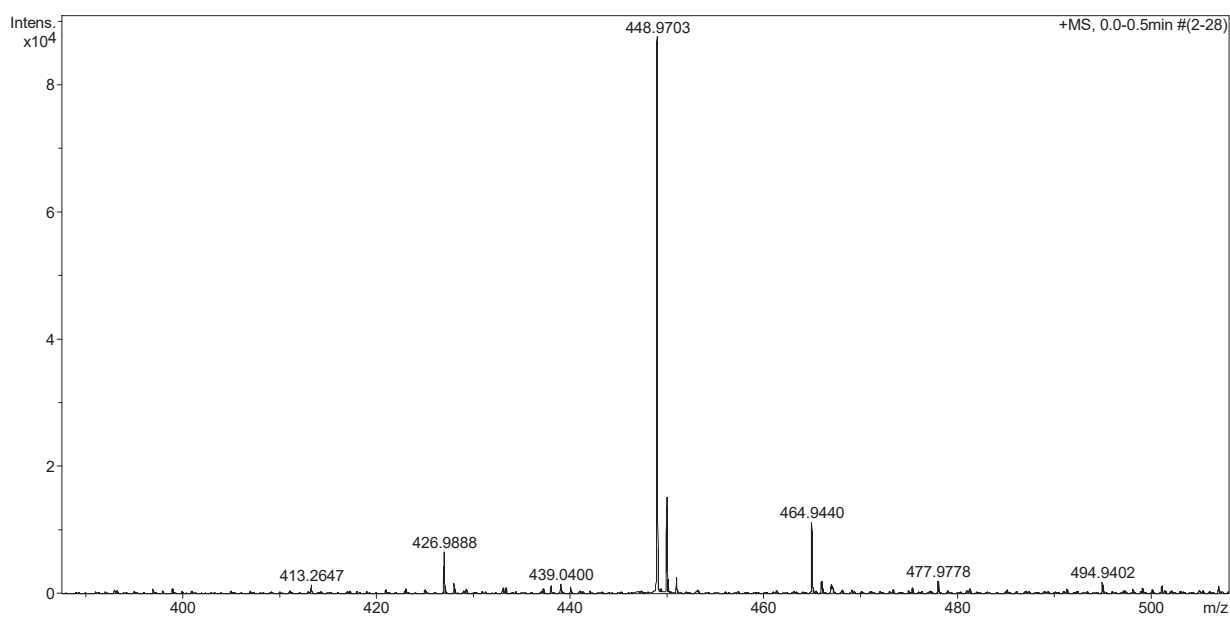



5a

## Mass Spectrum Report

## Analysis Info

Analysis Name D:\Data\2019\april\09\TOK128.d  
Method tune\_low.m  
Sample Name TOK128  
Comment MeOH

Acquisition Date 09.04.2019 17:30:18

Operator  
Instrument / Ser# Bruker Customer  
micrOTOF 10223

## Acquisition Parameter

|             |            |                      |          |                  |           |
|-------------|------------|----------------------|----------|------------------|-----------|
| Source Type | ESI        | Ion Polarity         | Positive | Set Nebulizer    | 0.4 Bar   |
| Focus       | Not active |                      |          | Set Dry Heater   | 180 °C    |
| Scan Begin  | 50 m/z     | Set Capillary        | 4500 V   | Set Dry Gas      | 4.0 l/min |
| Scan End    | 3000 m/z   | Set End Plate Offset | -500 V   | Set Divert Valve | Source    |

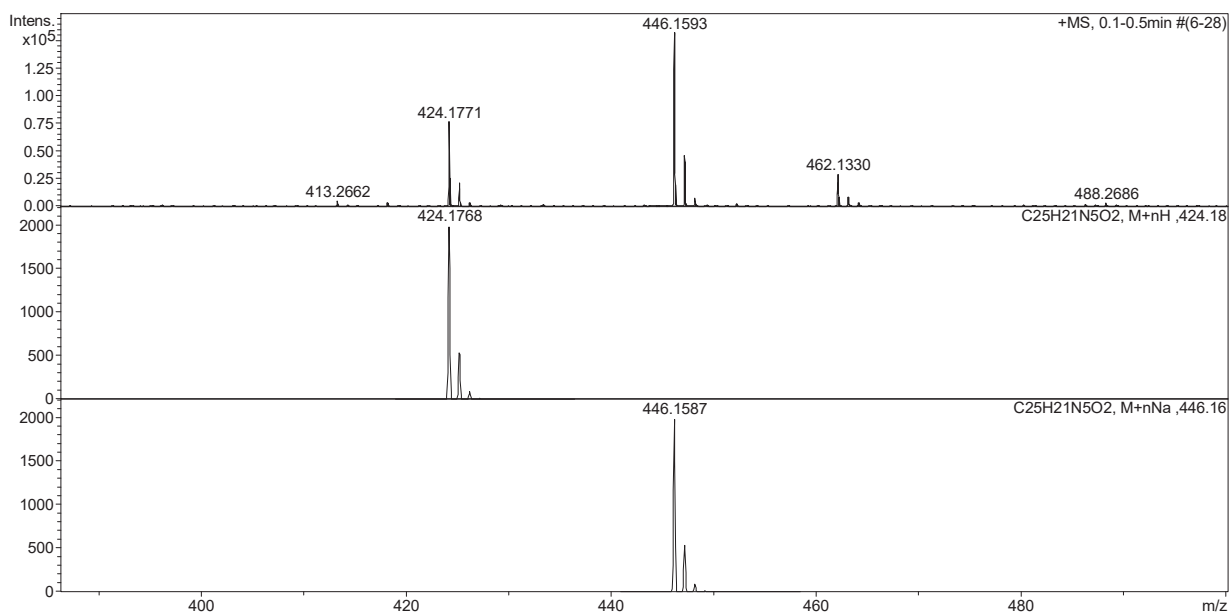

5b

## Mass Spectrum Report

## Analysis Info

Analysis Name D:\Data\2019\february\08\TOK102.d  
Method tune\_low.m  
Sample Name TOK102  
Comment MeOH

Acquisition Date 08.02.2019 14:19:51

Operator  
Instrument / Ser# Bruker Customer  
microTOF 10223

## Acquisition Parameter

|             |            |                      |          |                  |           |
|-------------|------------|----------------------|----------|------------------|-----------|
| Source Type | ESI        | Ion Polarity         | Positive | Set Nebulizer    | 0.4 Bar   |
| Focus       | Not active |                      |          | Set Dry Heater   | 180 °C    |
| Scan Begin  | 50 m/z     | Set Capillary        | 4500 V   | Set Dry Gas      | 4.0 l/min |
| Scan End    | 3000 m/z   | Set End Plate Offset | -500 V   | Set Divert Valve | Source    |

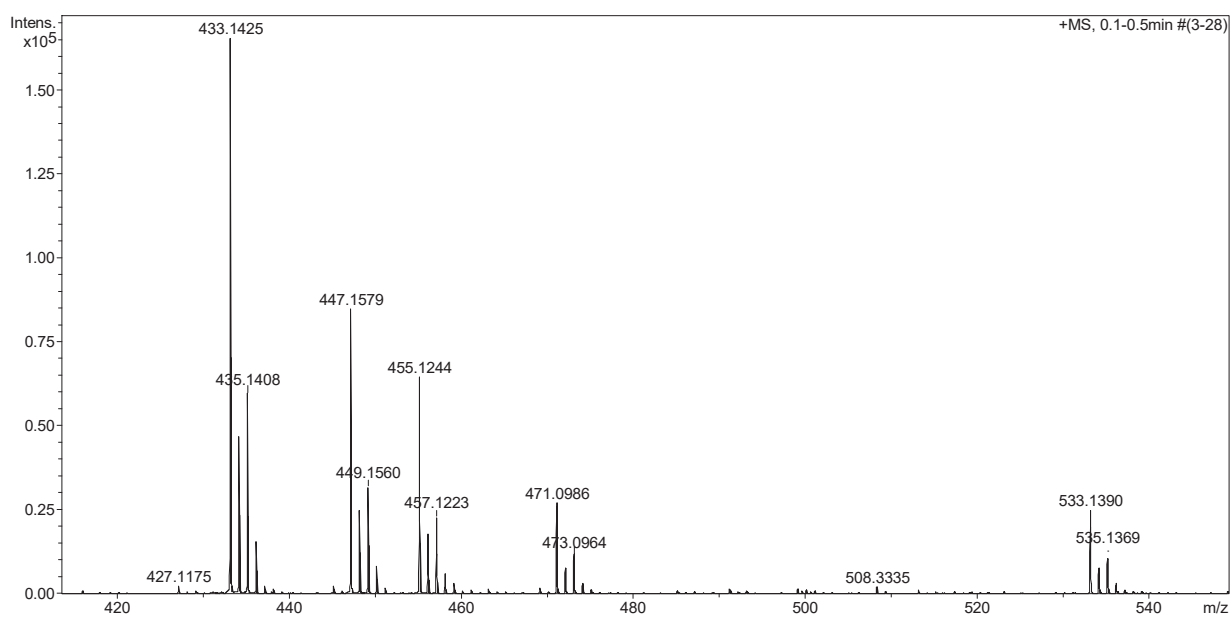

Mass Spectrum Report

|                       |                                 |                      |          |                   |           |                     |  |
|-----------------------|---------------------------------|----------------------|----------|-------------------|-----------|---------------------|--|
| Analysis Info         |                                 |                      |          | Acquisition Date  |           | 03.12.2018 13:48:26 |  |
| Analysis Name         | D:\Data\2018\december\3\TOK70.d |                      |          | Operator          |           | Bruker Customer     |  |
| Method                | tune_low.m                      |                      |          | Instrument / Ser# |           | microTOF 10223      |  |
| Sample Name           | TOK70                           |                      |          |                   |           |                     |  |
| Comment               | MeOH 50v                        |                      |          |                   |           |                     |  |
| Acquisition Parameter |                                 |                      |          |                   |           |                     |  |
| Source Type           | ESI                             | Ion Polarity         | Positive | Set Nebulizer     | 0.4 Bar   |                     |  |
| Focus                 | Not active                      |                      |          | Set Dry Heater    | 180 °C    |                     |  |
| Scan Begin            | 50 m/z                          | Set Capillary        | 4500 V   | Set Dry Gas       | 4.0 l/min |                     |  |
| Scan End              | 3000 m/z                        | Set End Plate Offset | -500 V   | Set Divert Valve  | Source    |                     |  |

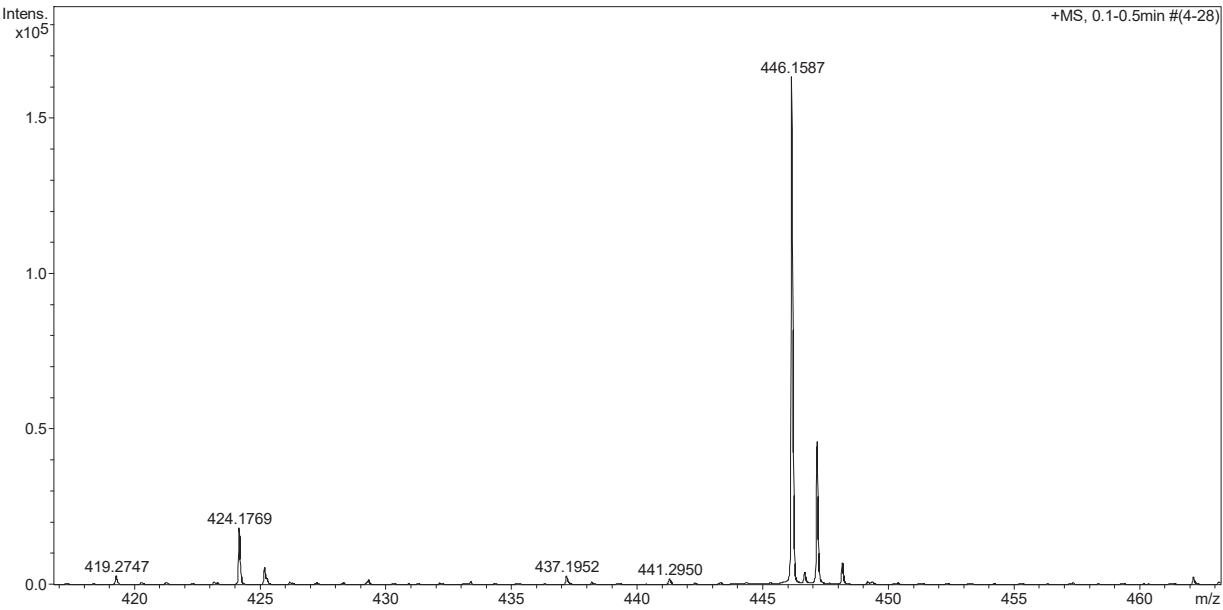

## Mass Spectrum Report

**Analysis Info**

Analysis Name D:\Data\2019\february\08\TOK101.d  
Method tune\_low.m  
Sample Name TOK101  
Comment MeOH

Acquisition Date 08.02.2019 14:05:29

Operator  
Instrument / Ser# Bruker Customer  
microTOF 10223

**Acquisition Parameter**

|             |            |                      |          |                  |           |
|-------------|------------|----------------------|----------|------------------|-----------|
| Source Type | ESI        | Ion Polarity         | Positive | Set Nebulizer    | 0.4 Bar   |
| Focus       | Not active |                      |          | Set Dry Heater   | 180 °C    |
| Scan Begin  | 50 m/z     | Set Capillary        | 4500 V   | Set Dry Gas      | 4.0 l/min |
| Scan End    | 3000 m/z   | Set End Plate Offset | -500 V   | Set Divert Valve | Source    |

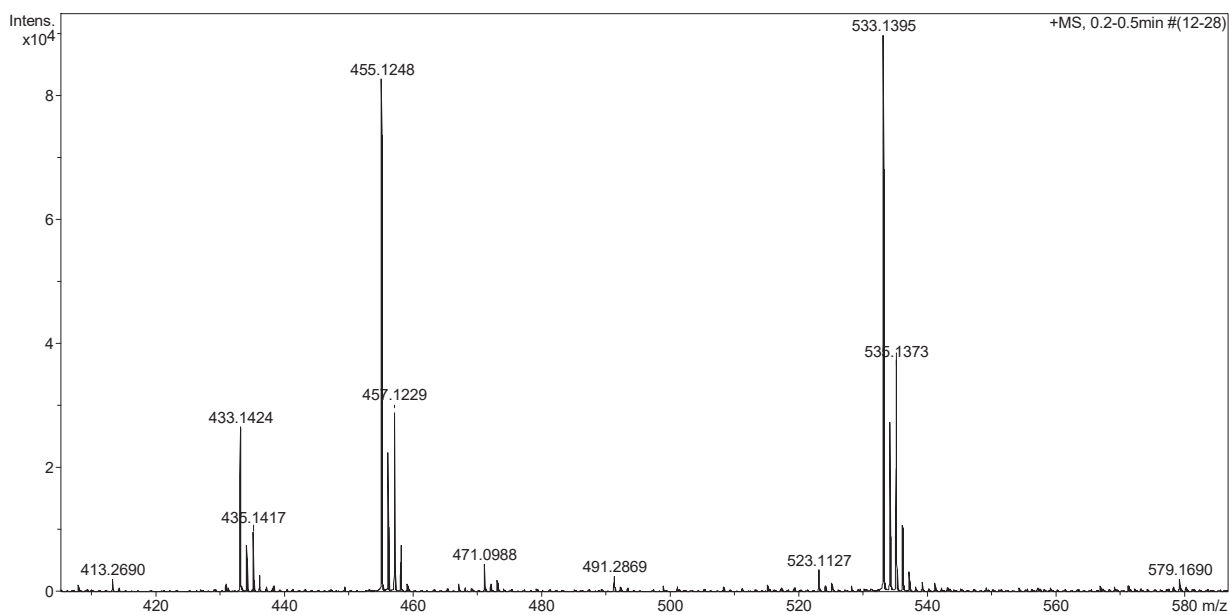

## Mass Spectrum Report

**Analysis Info**

Analysis Name D:\Data\2018\december\3\TOK71.d  
Method tune\_low.m  
Sample Name TOK71  
Comment MeOH 50v

Acquisition Date 03.12.2018 13:57:39

Operator  
Instrument / Ser# Bruker Customer  
microTOF 10223

**Acquisition Parameter**

|             |            |                      |          |                  |           |
|-------------|------------|----------------------|----------|------------------|-----------|
| Source Type | ESI        | Ion Polarity         | Positive | Set Nebulizer    | 0.4 Bar   |
| Focus       | Not active |                      |          | Set Dry Heater   | 180 °C    |
| Scan Begin  | 50 m/z     | Set Capillary        | 4500 V   | Set Dry Gas      | 4.0 l/min |
| Scan End    | 3000 m/z   | Set End Plate Offset | -500 V   | Set Divert Valve | Source    |

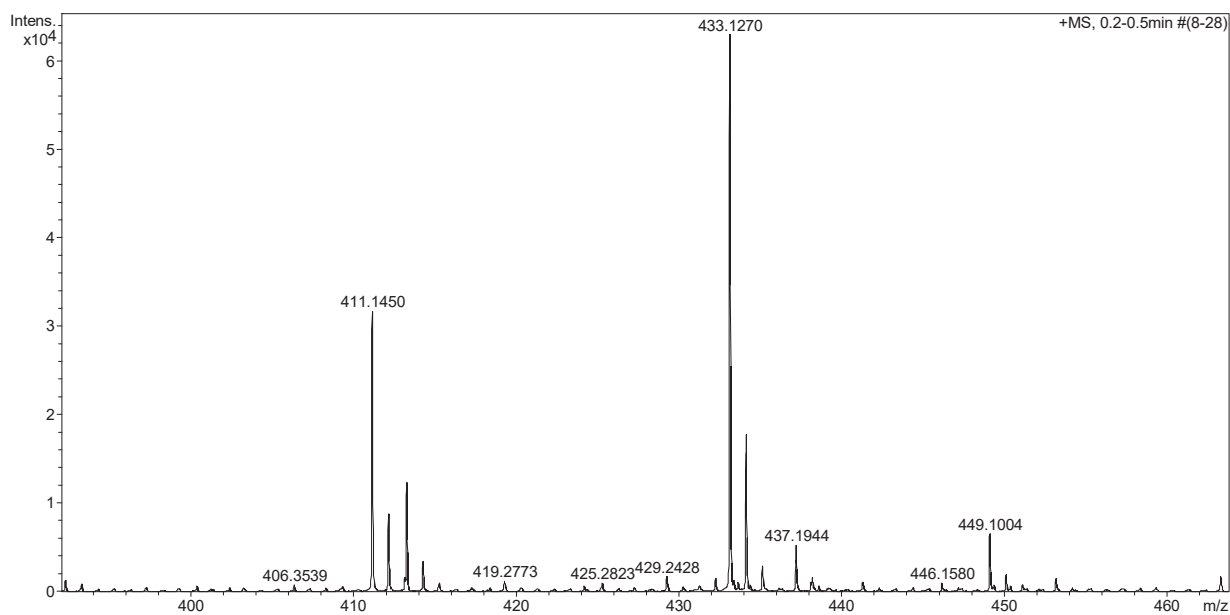

Mass Spectrum Report

|                       |                                 |                      |          |                   |                 |                     |  |
|-----------------------|---------------------------------|----------------------|----------|-------------------|-----------------|---------------------|--|
| Analysis Info         |                                 |                      |          | Acquisition Date  |                 | 21.01.2019 14:21:16 |  |
| Analysis Name         | D:\Data\2019\january\21\TOK64.d |                      |          | Operator          | Bruker Customer |                     |  |
| Method                | tune_low.m                      |                      |          | Instrument / Ser# | microTOF 10223  |                     |  |
| Sample Name           | TOK64                           |                      |          |                   |                 |                     |  |
| Comment               | MeOH                            |                      |          |                   |                 |                     |  |
| Acquisition Parameter |                                 |                      |          |                   |                 |                     |  |
| Source Type           | ESI                             | Ion Polarity         | Positive | Set Nebulizer     | 0.4 Bar         |                     |  |
| Focus                 | Not active                      |                      |          | Set Dry Heater    | 180 °C          |                     |  |
| Scan Begin            | 50 m/z                          | Set Capillary        | 4500 V   | Set Dry Gas       | 4.0 l/min       |                     |  |
| Scan End              | 3000 m/z                        | Set End Plate Offset | -500 V   | Set Divert Valve  | Source          |                     |  |

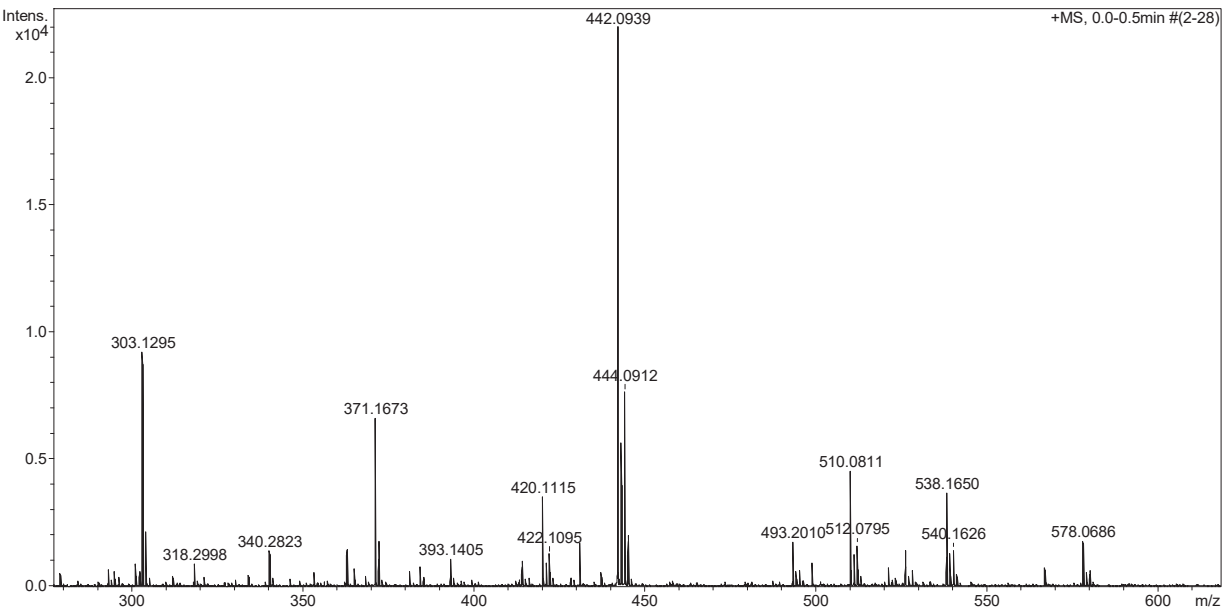

5g

Mass Spectrum Report

|                       |                                    |                      |          |                   |           |                     |  |
|-----------------------|------------------------------------|----------------------|----------|-------------------|-----------|---------------------|--|
| Analysis Info         |                                    |                      |          | Acquisition Date  |           | 24.05.2019 13:43:53 |  |
| Analysis Name         | D:\Data\Data\2019\may\24\TOK-100.d |                      |          | Operator          |           | Bruker Customer     |  |
| Method                | tune_low.m                         |                      |          | Instrument / Ser# |           | microTOF 10223      |  |
| Sample Name           | TOK-100                            |                      |          |                   |           |                     |  |
| Comment               | MeOH                               |                      |          |                   |           |                     |  |
| Acquisition Parameter |                                    |                      |          |                   |           |                     |  |
| Source Type           | ESI                                | Ion Polarity         | Positive | Set Nebulizer     | 1.0 Bar   |                     |  |
| Focus                 | Not active                         |                      |          | Set Dry Heater    | 180 °C    |                     |  |
| Scan Begin            | 50 m/z                             | Set Capillary        | 4500 V   | Set Dry Gas       | 8.0 l/min |                     |  |
| Scan End              | 3000 m/z                           | Set End Plate Offset | -500 V   | Set Divert Valve  | Source    |                     |  |

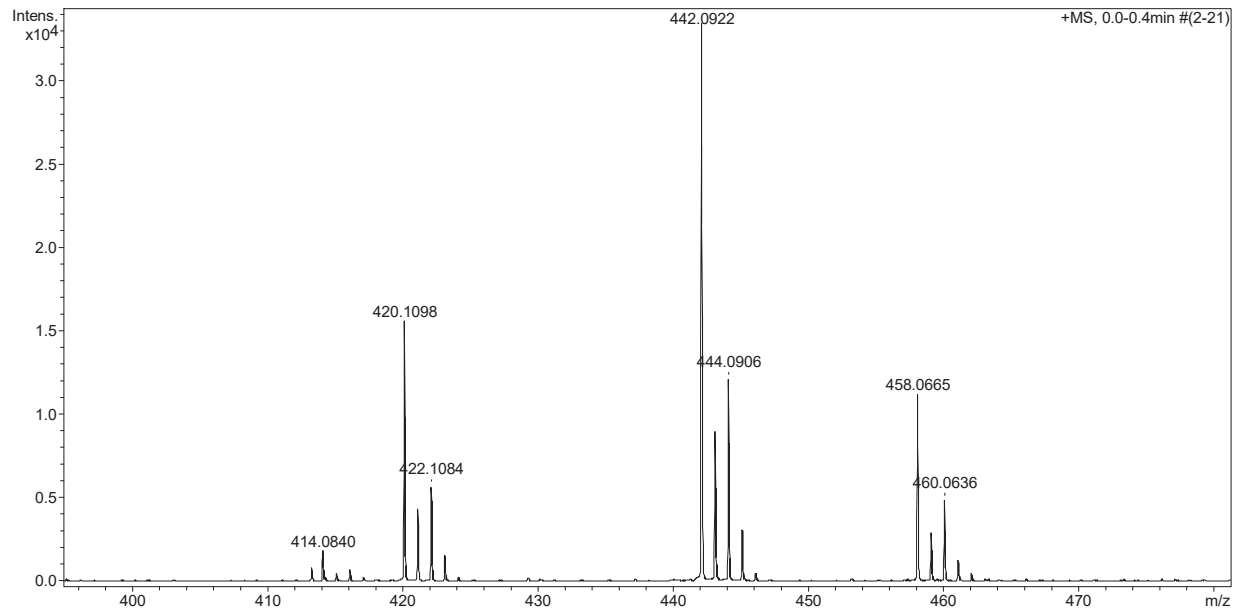

5h

Mass Spectrum Report

|                              |                                 |                      |          |                   |                     |  |
|------------------------------|---------------------------------|----------------------|----------|-------------------|---------------------|--|
| <b>Analysis Info</b>         |                                 |                      |          | Acquisition Date  | 21.01.2019 14:34:19 |  |
| Analysis Name                | D:\Data\2019\january\21\TOK72.d |                      |          | Operator          | Bruker Customer     |  |
| Method                       | tune_low.m                      |                      |          | Instrument / Ser# | microTOF 10223      |  |
| Sample Name                  | TOK72                           |                      |          |                   |                     |  |
| Comment                      | MeOH 300v                       |                      |          |                   |                     |  |
| <b>Acquisition Parameter</b> |                                 |                      |          |                   |                     |  |
| Source Type                  | ESI                             | Ion Polarity         | Positive | Set Nebulizer     | 0.4 Bar             |  |
| Focus                        | Not active                      |                      |          | Set Dry Heater    | 180 °C              |  |
| Scan Begin                   | 50 m/z                          | Set Capillary        | 4500 V   | Set Dry Gas       | 4.0 l/min           |  |
| Scan End                     | 3000 m/z                        | Set End Plate Offset | -500 V   | Set Divert Valve  | Source              |  |

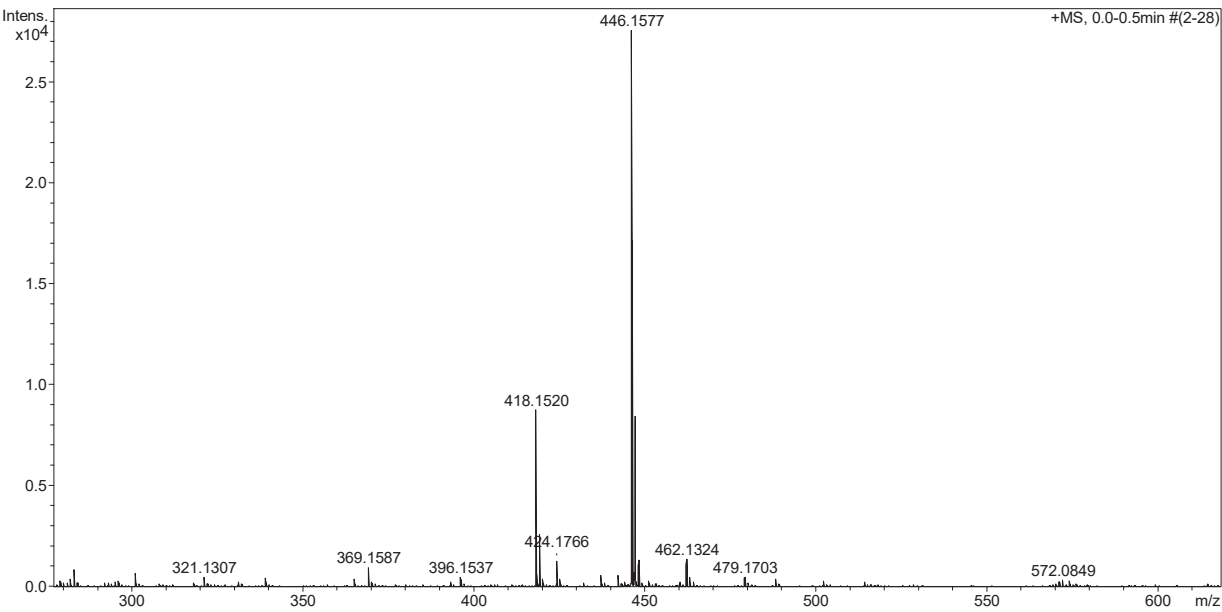



Mass Spectrum Report

|                       |                                 |                      |          |                   |           |                     |  |
|-----------------------|---------------------------------|----------------------|----------|-------------------|-----------|---------------------|--|
| Analysis Info         |                                 |                      |          | Acquisition Date  |           | 03.12.2018 13:40:50 |  |
| Analysis Name         | D:\Data\2018\december\3\TOK63.d |                      |          | Operator          |           | Bruker Customer     |  |
| Method                | tune_low.m                      |                      |          | Instrument / Ser# |           | microTOF 10223      |  |
| Sample Name           | TOK63                           |                      |          |                   |           |                     |  |
| Comment               | MeOH 50v                        |                      |          |                   |           |                     |  |
| Acquisition Parameter |                                 |                      |          |                   |           |                     |  |
| Source Type           | ESI                             | Ion Polarity         | Positive | Set Nebulizer     | 0.4 Bar   |                     |  |
| Focus                 | Not active                      |                      |          | Set Dry Heater    | 180 °C    |                     |  |
| Scan Begin            | 50 m/z                          | Set Capillary        | 4500 V   | Set Dry Gas       | 4.0 l/min |                     |  |
| Scan End              | 3000 m/z                        | Set End Plate Offset | -500 V   | Set Divert Valve  | Source    |                     |  |

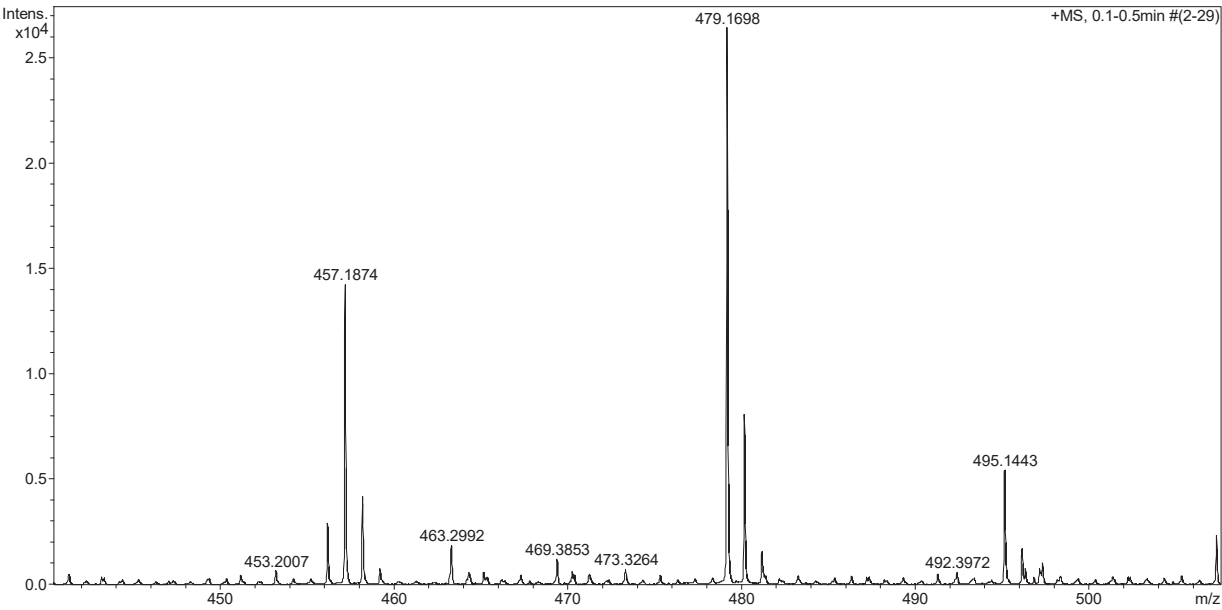

## Display Report

## Analysis Info

Analysis Name D:\Data\2021\june\22\TOK\_141000001.d  
Method tune\_low.m  
Sample Name  
Comment

Acquisition Date 22.06.2021 10:51:23

Operator Bruker Customer  
Instrument / Ser# microTOF 10223

## Acquisition Parameter

|             |            |                      |          |                  |           |
|-------------|------------|----------------------|----------|------------------|-----------|
| Source Type | ESI        | Ion Polarity         | Positive | Set Nebulizer    | 0.4 Bar   |
| Focus       | Not active |                      |          | Set Dry Heater   | 180 °C    |
| Scan Begin  | 100 m/z    | Set Capillary        | 4500 V   | Set Dry Gas      | 4.0 l/min |
| Scan End    | 1000 m/z   | Set End Plate Offset | -500 V   | Set Divert Valve | Source    |

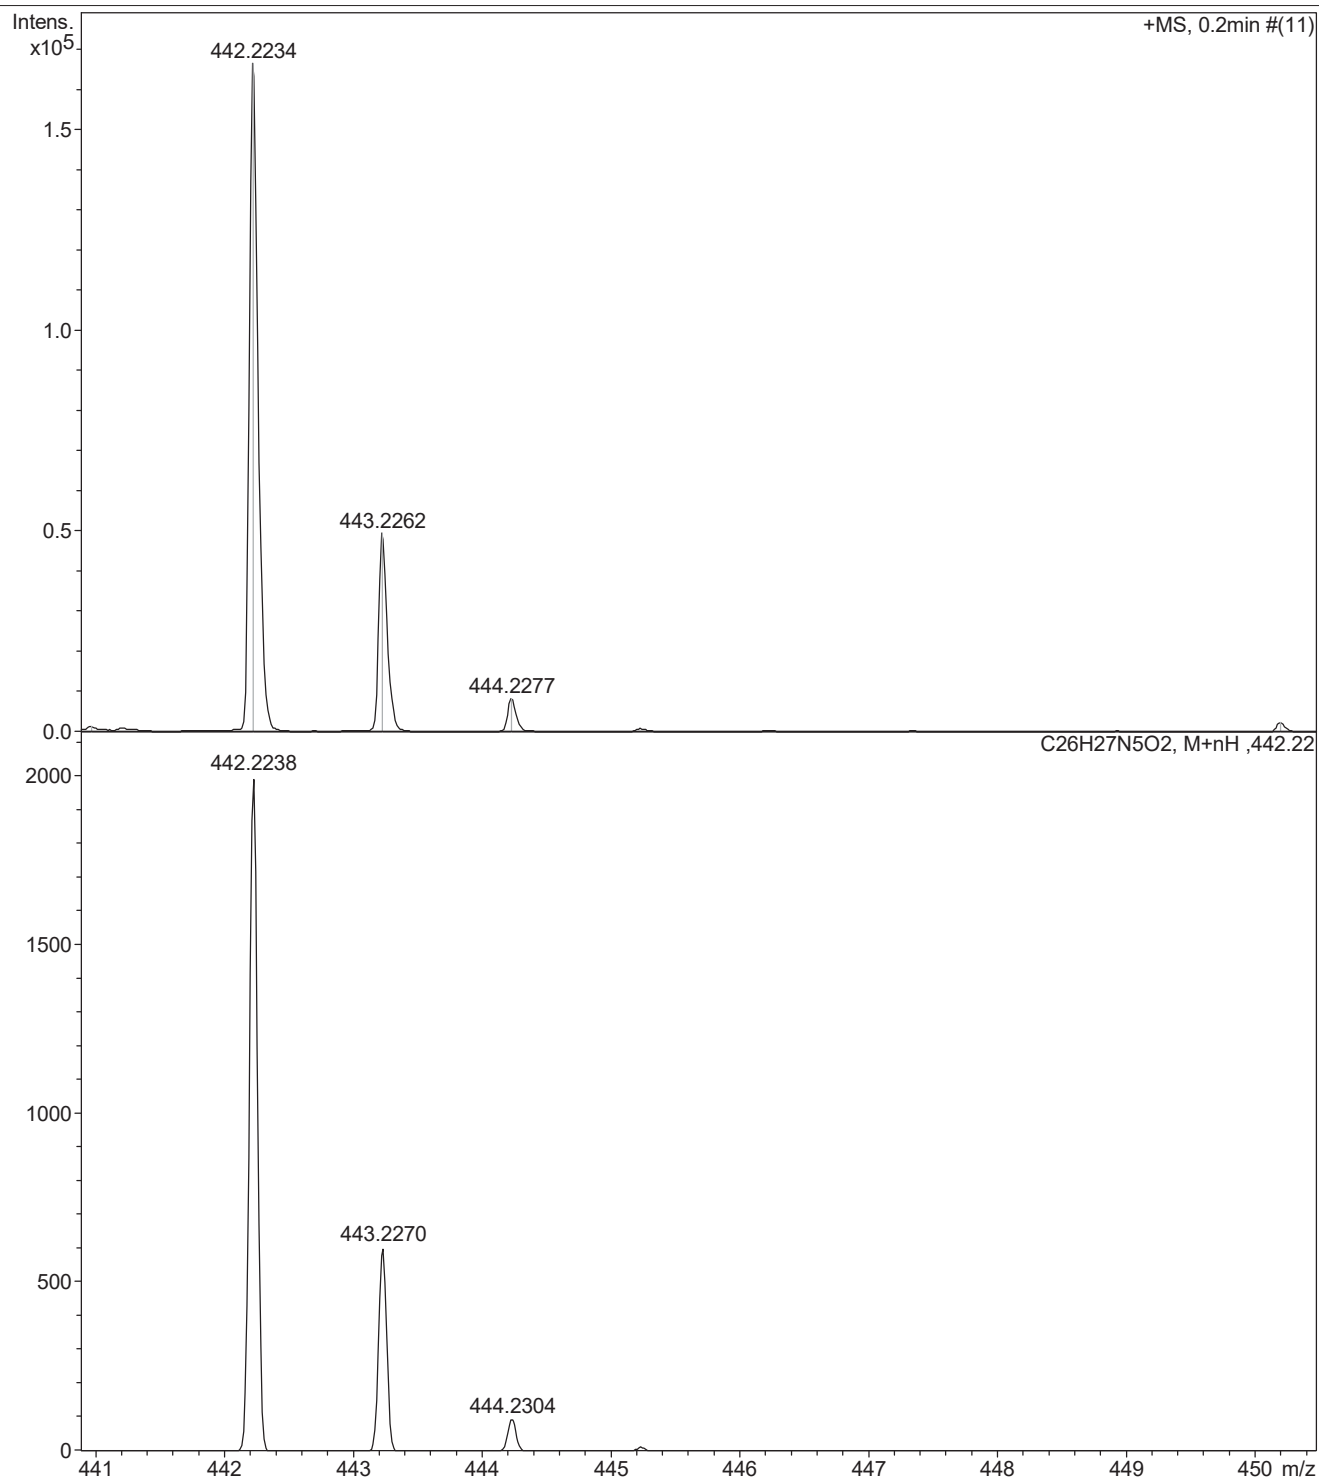

Display Report

|                      |                                  |                   |  |                    |  |
|----------------------|----------------------------------|-------------------|--|--------------------|--|
| <b>Analysis Info</b> |                                  | Acquisition Date  |  | 17-Feb-22 12:13:32 |  |
| Analysis Name        | D:\Data\Work\2022\02\17\GAI_18.d | Operator          |  | BDAL@DE            |  |
| Method               | 20211118_tune_low_pos.m          | Instrument / Ser# |  | maXis 62           |  |
| Sample Name          |                                  |                   |  |                    |  |
| Comment              |                                  |                   |  |                    |  |

|                              |            |                      |          |                  |           |
|------------------------------|------------|----------------------|----------|------------------|-----------|
| <b>Acquisition Parameter</b> |            |                      |          |                  |           |
| Source Type                  | ESI        | Ion Polarity         | Positive | Set Nebulizer    | 0.3 Bar   |
| Focus                        | Not active |                      |          | Set Dry Heater   | 180 °C    |
| Scan Begin                   | 100 m/z    | Set Capillary        | 3200 V   | Set Dry Gas      | 4.0 l/min |
| Scan End                     | 1000 m/z   | Set End Plate Offset | -500 V   | Set Divert Valve | Source    |

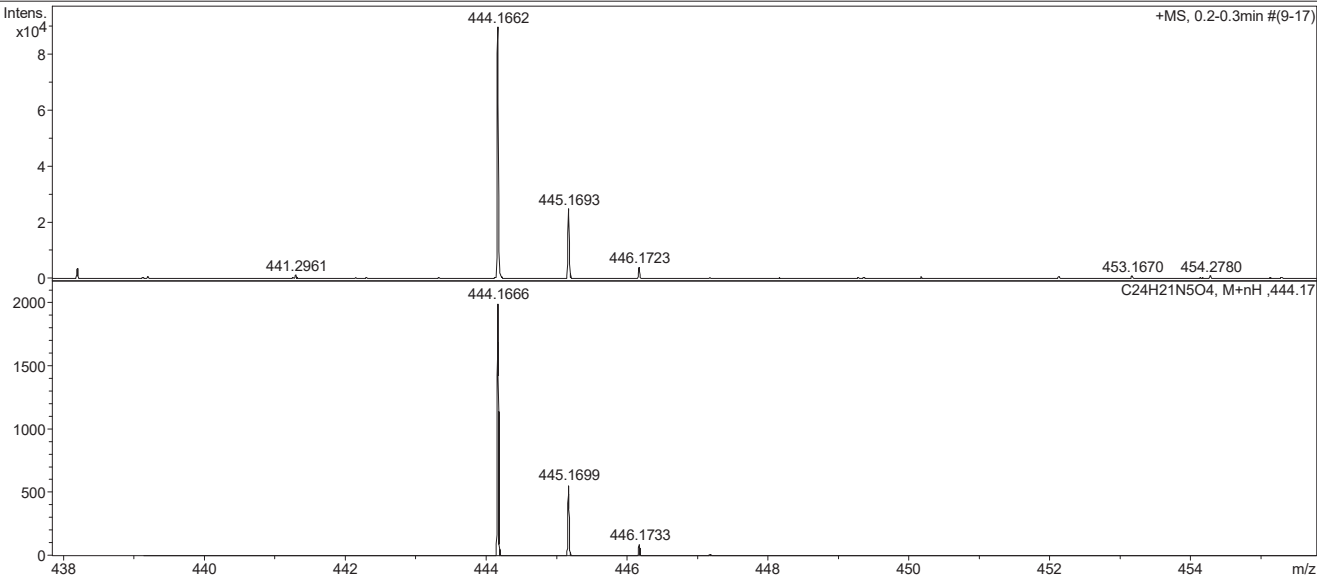

## Display Report

## Analysis Info

Analysis Name D:\Data\2021\june\22\TOK\_156000001.d  
Method tune\_low.m  
Sample Name  
Comment

Acquisition Date 22.06.2021 10:57:16

Operator Bruker Customer  
Instrument / Ser# microTOF 10223

## Acquisition Parameter

|             |            |                      |          |                  |           |
|-------------|------------|----------------------|----------|------------------|-----------|
| Source Type | ESI        | Ion Polarity         | Positive | Set Nebulizer    | 0.4 Bar   |
| Focus       | Not active |                      |          | Set Dry Heater   | 180 °C    |
| Scan Begin  | 100 m/z    | Set Capillary        | 4500 V   | Set Dry Gas      | 4.0 l/min |
| Scan End    | 1000 m/z   | Set End Plate Offset | -500 V   | Set Divert Valve | Source    |

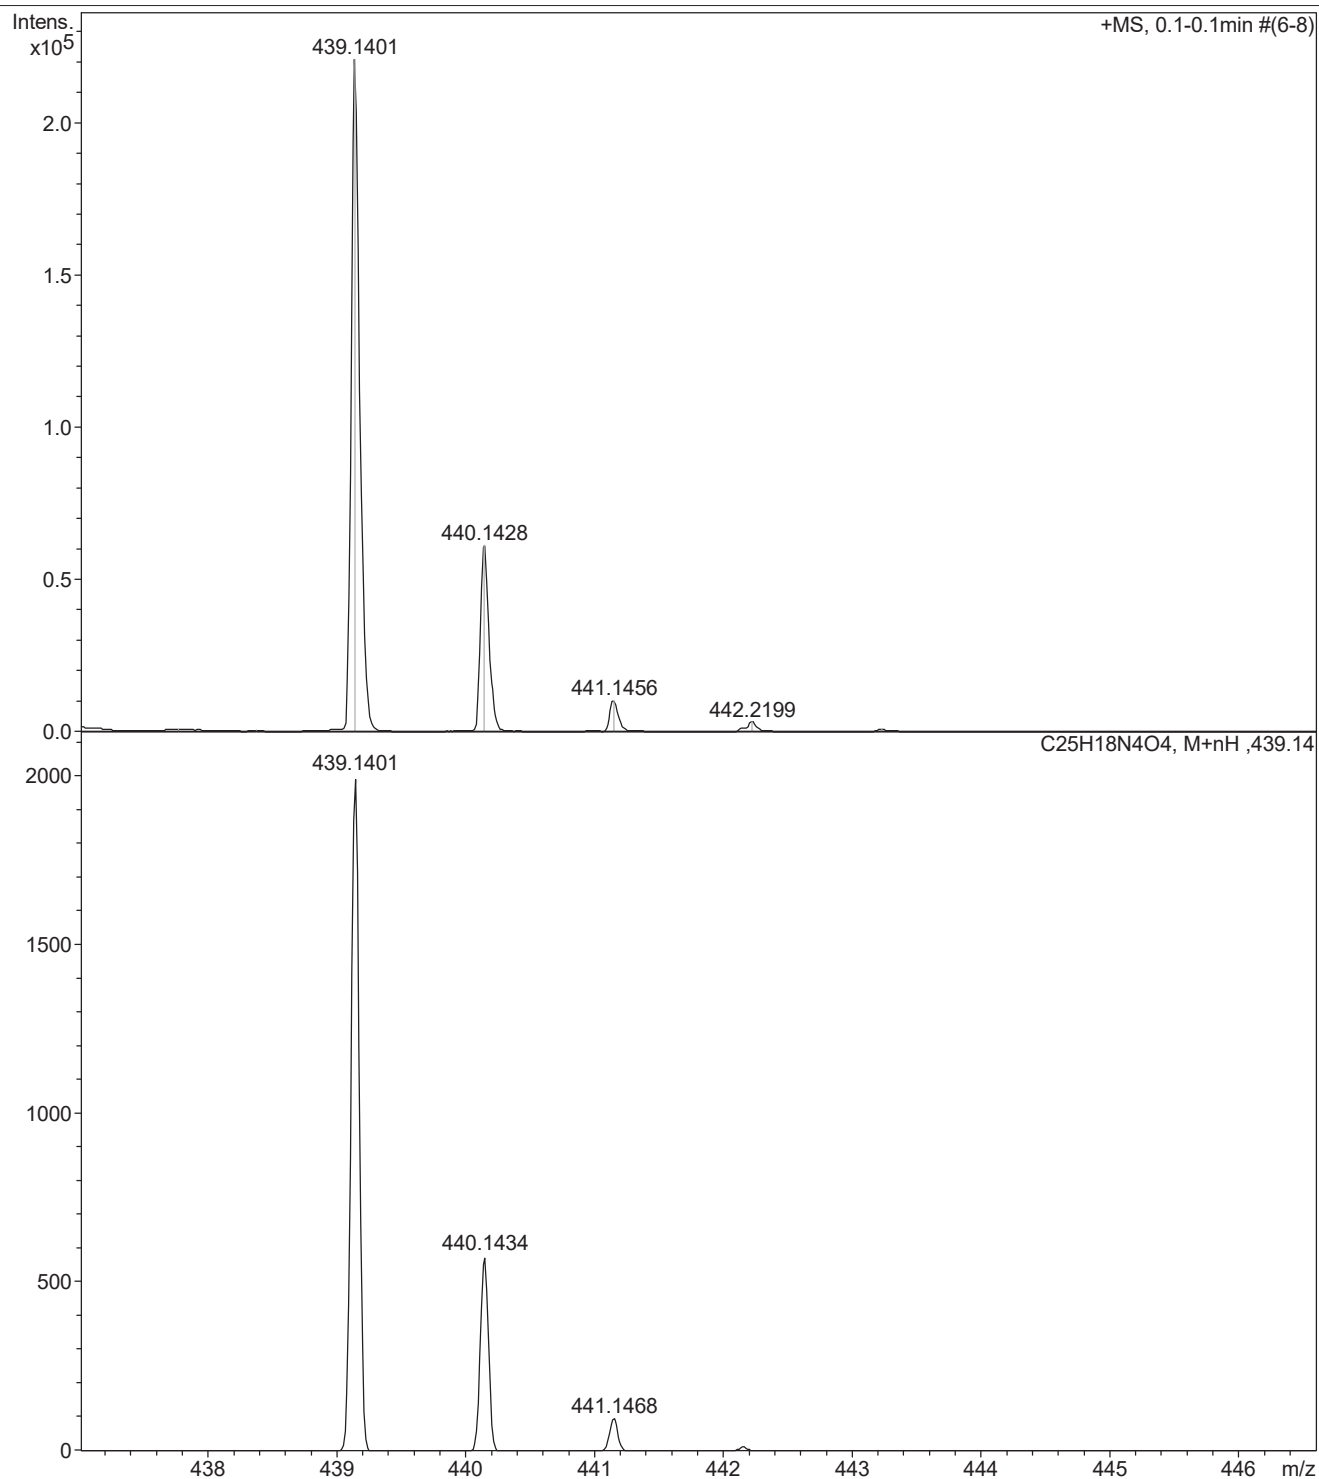

## Display Report

## Analysis Info

Analysis Name D:\Data\2021\june\22\TOK\_157000001.d  
Method tune\_low.m  
Sample Name  
Comment

Acquisition Date 22.06.2021 11:00:19

Operator Bruker Customer  
Instrument / Ser# microTOF 10223

## Acquisition Parameter

|             |            |                      |          |                  |           |
|-------------|------------|----------------------|----------|------------------|-----------|
| Source Type | ESI        | Ion Polarity         | Positive | Set Nebulizer    | 0.4 Bar   |
| Focus       | Not active |                      |          | Set Dry Heater   | 180 °C    |
| Scan Begin  | 100 m/z    | Set Capillary        | 4500 V   | Set Dry Gas      | 4.0 l/min |
| Scan End    | 1000 m/z   | Set End Plate Offset | -500 V   | Set Divert Valve | Source    |

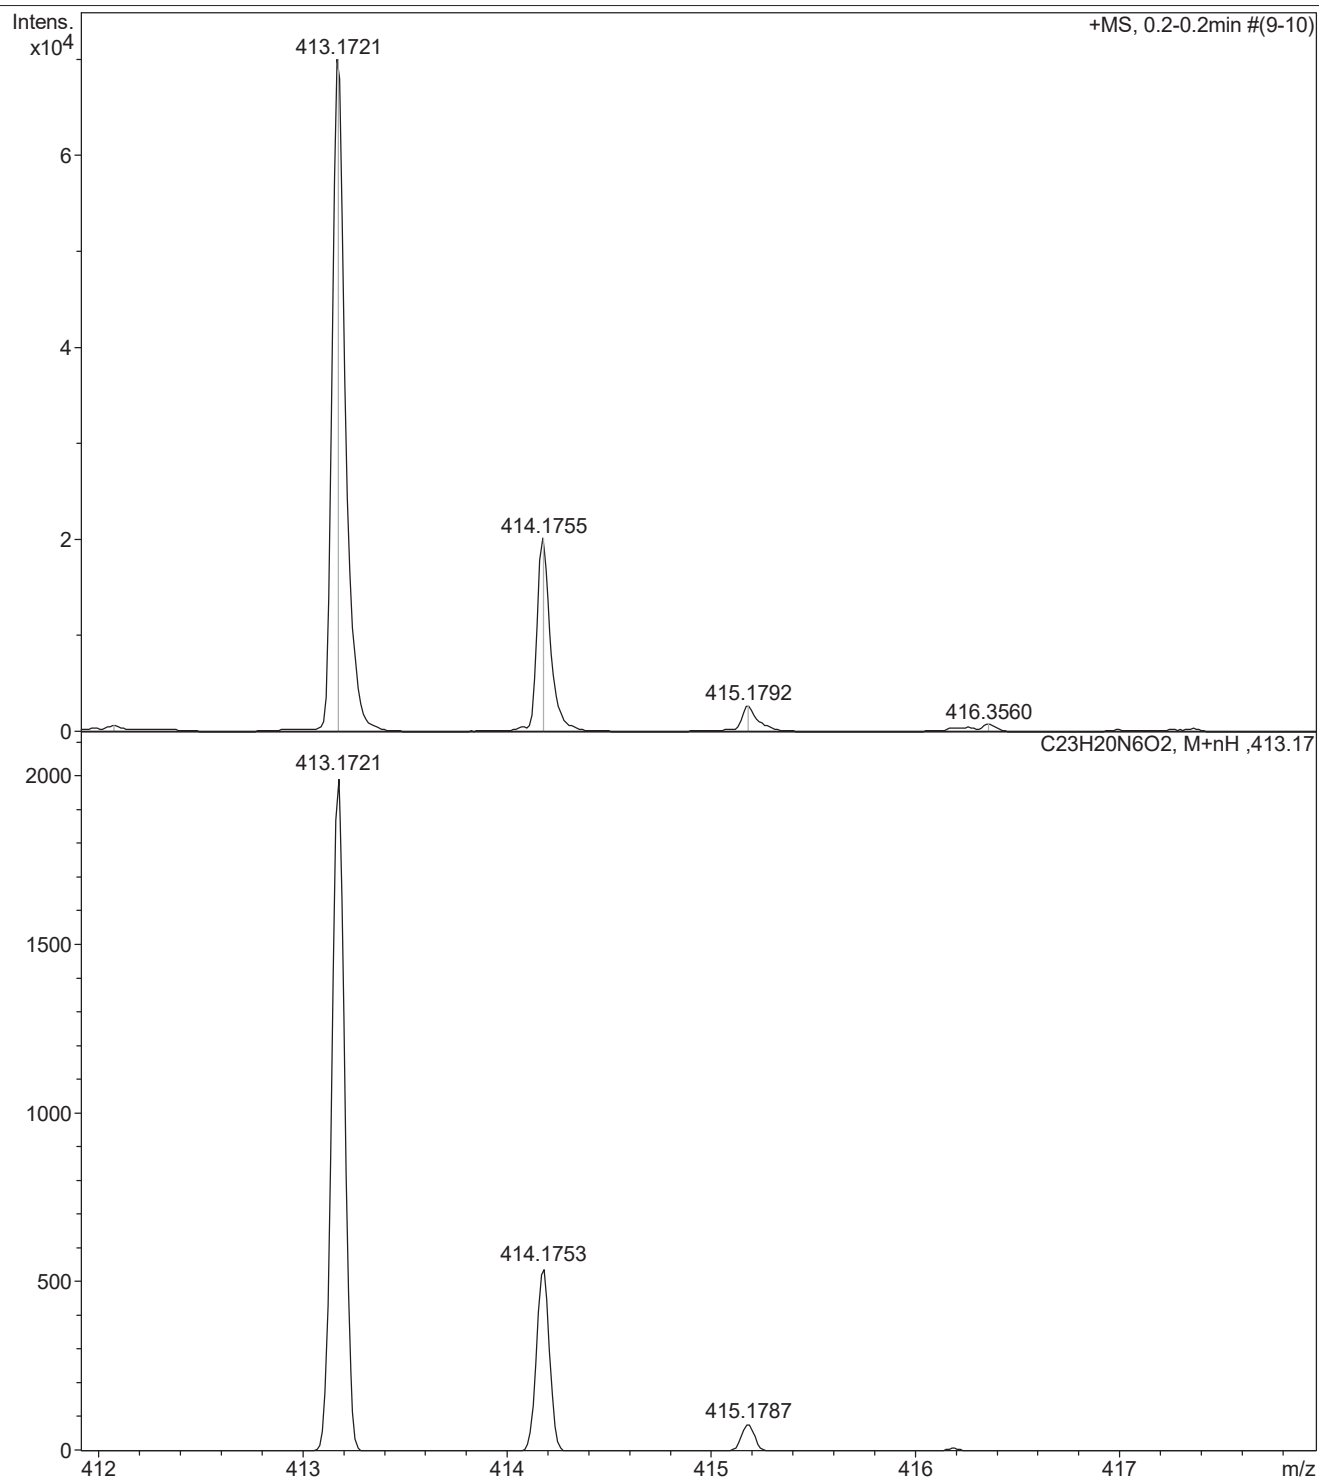

# Mass Spectrum Report

**Analysis Info**

Analysis Name D:\Data\Data\2019\april\25\TOK134.d  
Method tune\_low.m  
Sample Name TOK134  
Comment MeOH

Acquisition Date 25.04.2019 10:24:31

Operator Bruker Customer  
Instrument / Ser# micrOTOF 10223

**Acquisition Parameter**

|             |            |                      |          |                  |           |
|-------------|------------|----------------------|----------|------------------|-----------|
| Source Type | ESI        | Ion Polarity         | Positive | Set Nebulizer    | 1.0 Bar   |
| Focus       | Not active |                      |          | Set Dry Heater   | 180 °C    |
| Scan Begin  | 50 m/z     | Set Capillary        | 4500 V   | Set Dry Gas      | 8.0 l/min |
| Scan End    | 3000 m/z   | Set End Plate Offset | -500 V   | Set Divert Valve | Source    |

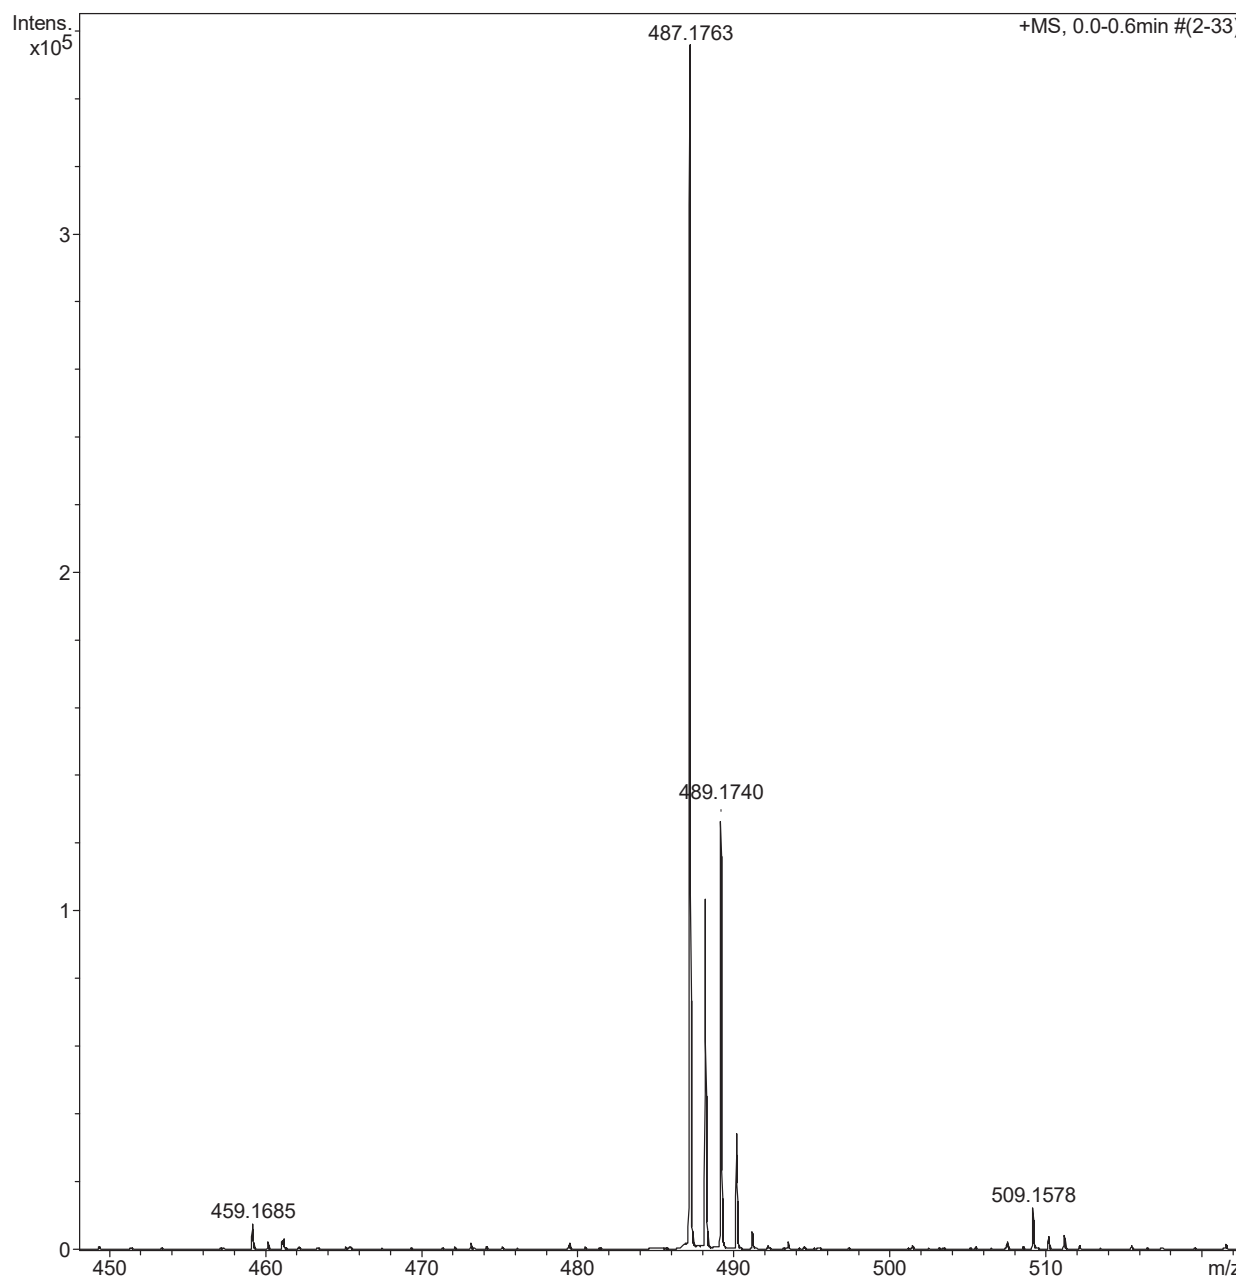

# Mass Spectrum Report

**Analysis Info**

Analysis Name D:\Data\2019\december\20\GAI954.d  
Method tune\_low.m  
Sample Name GAI954  
Comment

Acquisition Date 20.12.2019 18:13:57

Operator Bruker Customer  
Instrument / Ser# microTOF 10223

**Acquisition Parameter**

|             |            |                      |          |                  |           |
|-------------|------------|----------------------|----------|------------------|-----------|
| Source Type | ESI        | Ion Polarity         | Positive | Set Nebulizer    | 0.4 Bar   |
| Focus       | Not active |                      |          | Set Dry Heater   | 180 °C    |
| Scan Begin  | 50 m/z     | Set Capillary        | 4500 V   | Set Dry Gas      | 4.0 l/min |
| Scan End    | 3000 m/z   | Set End Plate Offset | -500 V   | Set Divert Valve | Source    |

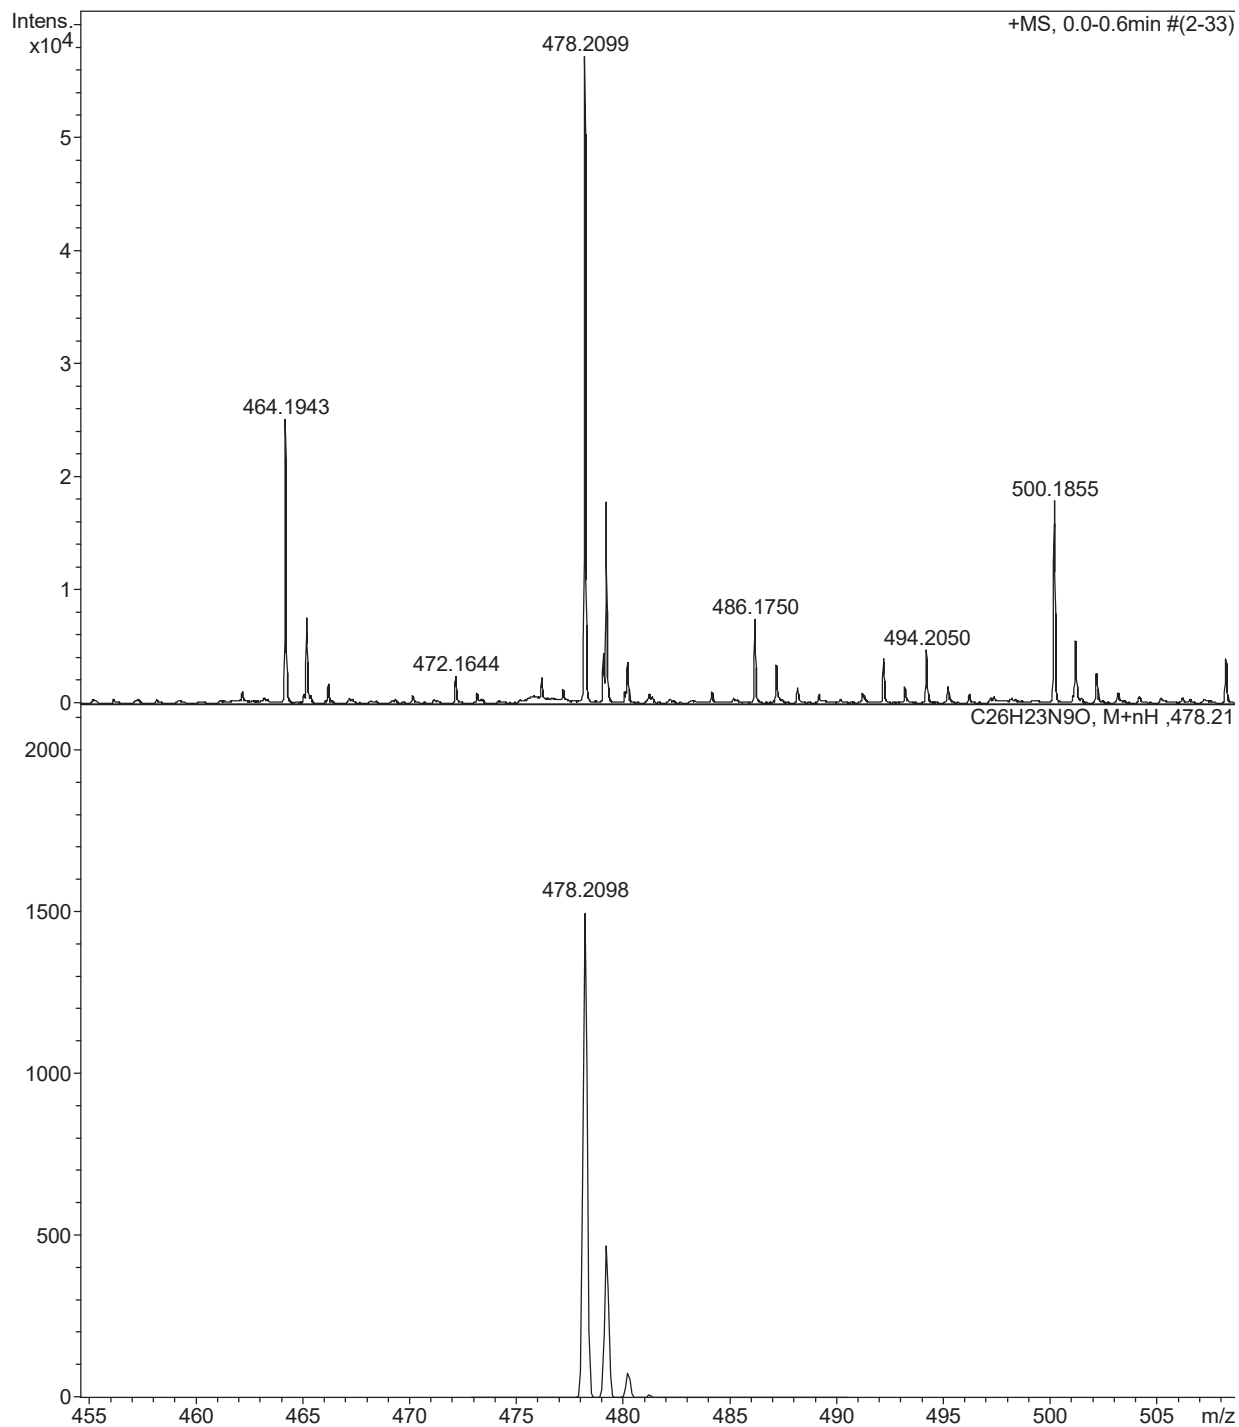

# Mass Spectrum Report

**Analysis Info**

Analysis Name D:\Data\2019\december\23\GAI958.d  
Method tune\_low.m  
Sample Name GAI958  
Comment MeOH

Acquisition Date 23.12.2019 9:47:53

Operator Bruker Customer  
Instrument / Ser# microTOF 10223

**Acquisition Parameter**

|             |            |                      |          |                  |           |
|-------------|------------|----------------------|----------|------------------|-----------|
| Source Type | ESI        | Ion Polarity         | Positive | Set Nebulizer    | 0.4 Bar   |
| Focus       | Not active |                      |          | Set Dry Heater   | 180 °C    |
| Scan Begin  | 50 m/z     | Set Capillary        | 4500 V   | Set Dry Gas      | 4.0 l/min |
| Scan End    | 3000 m/z   | Set End Plate Offset | -500 V   | Set Divert Valve | Source    |

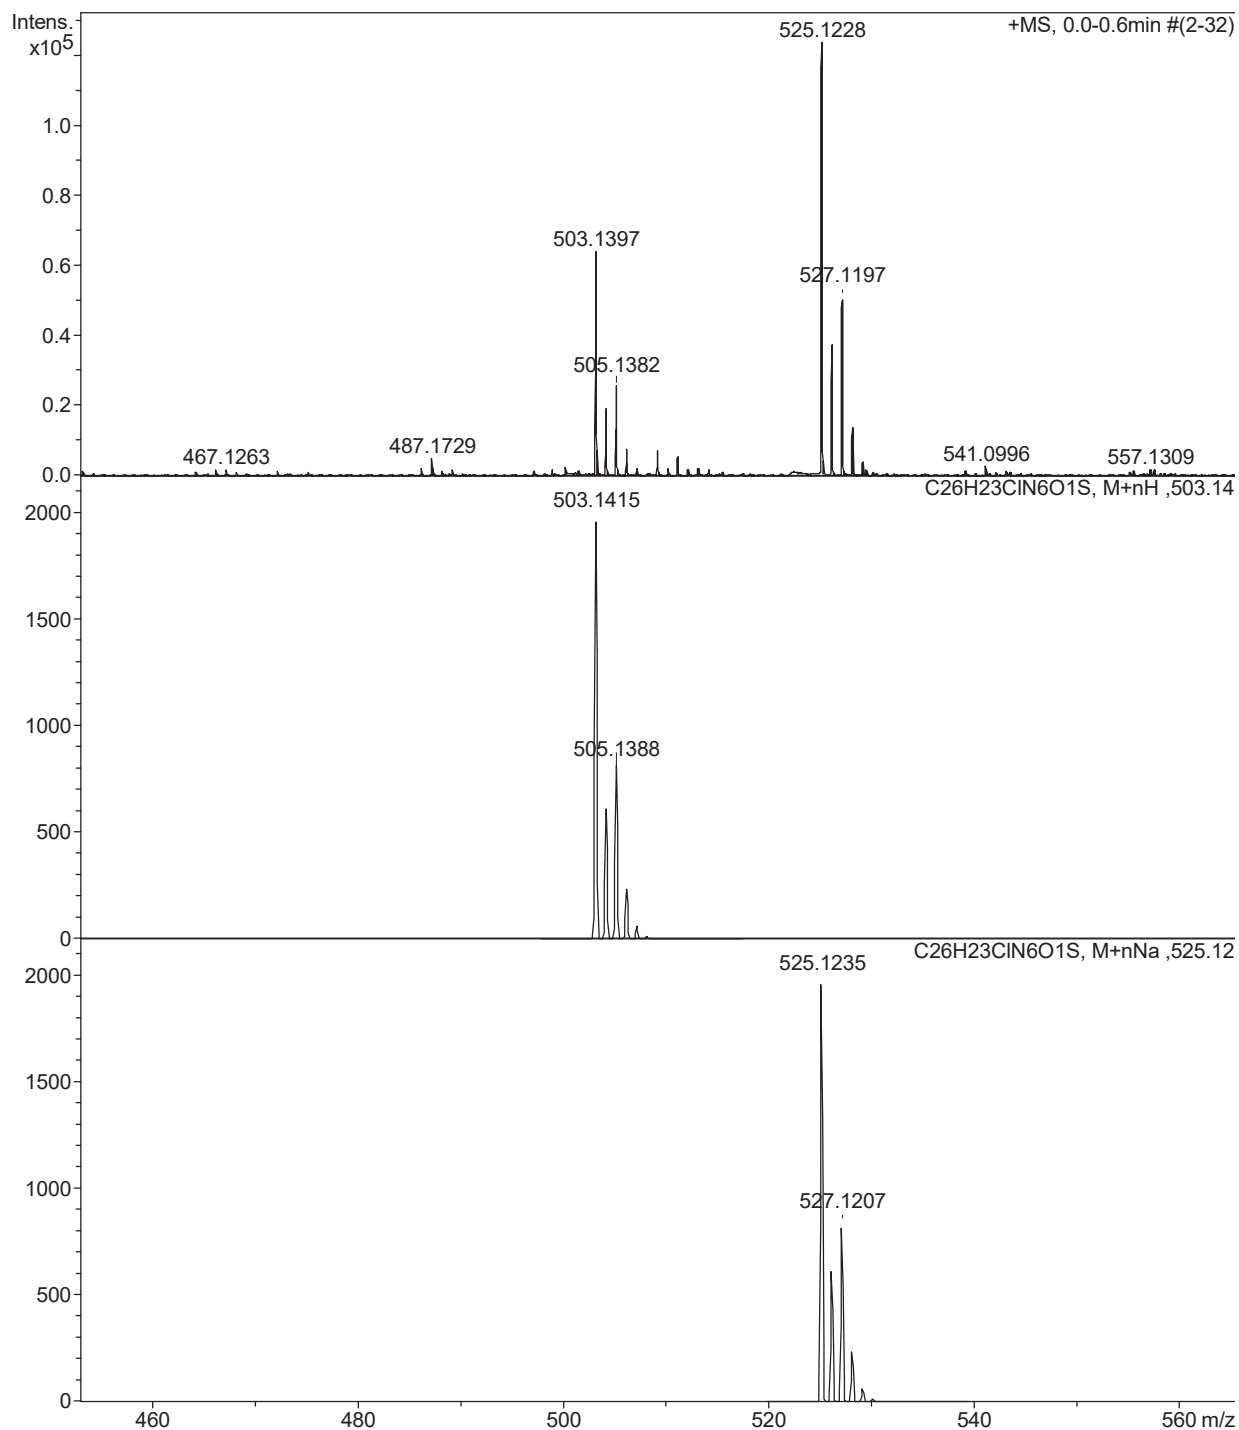

Supplement: s1 [file s1]
